# Supplementary material
Source: PubMed Central journal article supplement (PMC2602842)

## Supporting Information

Oxidative Palladium(II) Catalysis: A Highly Efficient and Chemoselective  
Cross Coupling Method for Carbon-Carbon Bond Formation under Base-  
Free and Nitrogenous-Ligand Conditions

**Kyung Soo Yoo, Cheol Hwan Yoon, and Kyung Woon Jung\***

*Loker Hydrocarbon Research Institute and Department of Chemistry,  
University of Southern California, Los Angeles, California 90089-1661*

kwjung@usc.edu

|                                                                                                                                                        |           |
|--------------------------------------------------------------------------------------------------------------------------------------------------------|-----------|
| <b>General Experimental Conditions</b> .....                                                                                                           | S2        |
| <b>General procedure A for the coupling reaction with pinacolboronic ester and olefin in the absence of base (Base Free Conditions)</b> .....          | S3        |
| <b>General procedure B for the coupling reaction with pinacolboronic ester and olefin in the presence of 1,10-phenanthroline as a ligand</b> .....     | S8        |
| <b>General procedure C for the coupling reaction with arylboronic acid and olefin in the presence of 2,9-dimethyl-phenanthroline as a ligand</b> ..... | S11       |
| <b>Spectral data (<sup>1</sup>H and <sup>13</sup>C NMR)</b> .....                                                                                      | S15 ~ S73 |

**General Experimental Conditions.** DMF, DMA, THF, acetonitrile, and toluene were used in anhydrous forms, which were purchased from Aldrich chemical. <sup>1</sup>H NMR spectra were recorded at 250, 300, and 400 MHz. <sup>13</sup>C NMR spectra were recorded at 63, 75.5, and 100 MHz. Thin-layer chromatography (TLC) was performed using commercially prepared 60 mesh silica gel plates visualized with short-wavelength UV light (254 nm). Silica gel 60 (9385, 230-400 mesh) was used for column chromatography. The reported yields are isolated yields and are the average of two runs. All commercially available reagents such as boronic acids and olefins were used as received from Aldrich and Acros chemical. In addition, the use of oxygen in conjunction with metals can lead to explosive mixtures, and care should be exercised especially when scaling up although we have not encountered any dangerous incidents during the oxidative palladium(II) catalysis reactions.

**(*IE*)-2-Hex-1-enyl-4,4,5,5-tetramethyl-[1,3,2]dioxaborolane (1):** To a stirred solution of 1-hexyne (1 g, 12.2 mmol), was cautiously added catechol borane (1.4 ml, 13.4 mmol) under a N<sub>2</sub> atmosphere, and the resulting mixture was maintained at 70 °C for 2 hours with stirring. After cooled to room temperature, the reaction was diluted with THF (30 mL) prior to the addition of pinacol (1.7 g, 14.6 mmol). The resulting reaction mixture was stirred for 3 hours at room temperature, diluted with EtOAc (30 mL) and washed with water followed by saturated brine. The separated organic layer was dried over anhydrous Na<sub>2</sub>SO<sub>4</sub>, filtered and reduced *in vacuo* to give an oil, which was column chromatographed eluting with 10% EtOAc in hexanes to afford **1** (78%) as colorless oil: <sup>1</sup>H NMR (250 MHz, CDCl<sub>3</sub>) δ=6.61 (dt, *J* = 6.5, 17.9 Hz, 1 H), 5.40 (d, *J* = 17.9 Hz, 1 H), 2.13 (dt, *J* = 6.5, 6.6 Hz, 2 H), 1.27-1.41 (m, 4 H), 1.24 (s, 12 H), 0.86 (t, *J* = 6.9 Hz, 3 H).

**General procedure A for the coupling reaction with pinacolboronic ester and olefin in the absence of base (Base Free Conditions):** To a solution of olefin (1.5 mmol) in *N,N*-dimethylacetamide (2.5 mL, C = 0.2 M), was added pinacolboronic ester (0.5 mmol) followed by a single addition of Pd(OAc)<sub>2</sub> (0.025 mmol). The reaction flask was fitted with an oxygen balloon. The resulting reaction was stirred for 6 hours at 50 °C, diluted with ethyl acetate (20 mL), and washed with water (2 X 10 mL). The separated organic layer was dried over anhydrous Na<sub>2</sub>SO<sub>4</sub> and filtered. The filtrate was concentrated *in vacuo*, and subjected to flash chromatography affording a cross-coupling compound.

**(2*E*,4*E*)-Nona-2,4-dienoic acid *tert*-butyl ester (2):** Following the general procedure A, cross coupling reaction of boronic ester **1** with *tert*-butyl acrylate afforded diene **2** (95%): <sup>1</sup>H NMR (250 MHz, CDCl<sub>3</sub>) δ = 7.13 (dd, *J* = 25.4, 15.4 Hz, 1 H), 6.10 (m, 2 H), 5.68 (d, *J* = 15.4 Hz, 1 H), 2.12 (m, 2 H), 1.45 (s, 9 H), 1.32 (m, 4 H), 0.87 (t, *J* = 6.9 Hz, 3 H); <sup>13</sup>C NMR (63 MHz, CDCl<sub>3</sub>) δ = 166.7, 144.1, 144.0, 128.3, 121.0, 80.0, 32.6, 30.8, 28.1, 22.2, 13.8.; Anal. calcd for C<sub>13</sub>H<sub>22</sub>O<sub>2</sub>: C 74.24, H 10.54, found: C 74.23, H 10.54.

**(1*E*,3*E*)-Octa-1,3-dienyl-benzene (9):** Following the general procedure A, cross coupling reaction of boronic ester **1** with styrene afforded diene **9** (88%): <sup>1</sup>H NMR (250 MHz, CDCl<sub>3</sub>) δ = 7.27 (m, 5 H, Ph), 6.73 (dd, *J* = 15.6, 10.3 Hz, 1 H), 6.41 (d, *J* = 15.6 Hz, 1 H), 6.18 (dd, *J* = 15.1, 10.3 Hz, 1 H), 5.80 (dt, *J* = 15.1, 7.5 Hz, 1 H), 2.12 (m, 2 H), 1.34 (m, 4 H), 0.88 (t, *J* = 6.9 Hz, 3 H); <sup>13</sup>C NMR (63 MHz, CDCl<sub>3</sub>) δ = 137.6, 136.0, 130.4, 129.9, 129.4, 128.5, 127.0, 126.1, 32.6, 31.4, 22.3, 14.0; Anal. calcd for C<sub>14</sub>H<sub>18</sub>: C 90.26, H 9.74, found: C 90.25, H 9.75.

**(2E,4E)-Nona-2,4-dienyloxymethyl-benzene (10):** Following the general procedure A, cross coupling reaction of boronic ester **1** with allyl benzyl ether afforded diene **10** (87%): <sup>1</sup>H NMR (250 MHz, CDCl<sub>3</sub>) δ = 7.28 (m, 5 H, Ph), 6.21 (dd, *J* = 15.2, 10.5 Hz, 1 H), 6.03 (dd, *J* = 15.2, 10.2 Hz, 1 H), 5.68 (m, 2 H), 4.48 (s, 2 H), 4.02 (d, *J* = 6.3 Hz, 2 H), 2.11 (m, 2 H), 1.31 (m, 4 H), 0.87 (t, *J* = 6.8 Hz, 3 H); <sup>13</sup>C NMR (63 MHz, CDCl<sub>3</sub>) δ = 138.3, 135.7, 133.5, 129.4, 128.3, 127.8, 127.5, 126.8, 71.9, 70.6, 32.3, 31.3, 22.2, 13.9; Anal. calcd for C<sub>16</sub>H<sub>22</sub>O: C 83.43, H 9.65, found: C 83.39, H 9.67.

**(2E,4E)- and (2Z,4E)-Nona-2,4-dienenitrile (11):** Following the general procedure A, cross coupling reaction of boronic ester **1** with acrylonitrile afforded an inseparable mixture of (2E,4E)- and (2Z,4E)-diene **10** (78%, 2E,4E:2Z,4E=3:2). For (2E,4E): <sup>1</sup>H NMR (250 MHz, CDCl<sub>3</sub>) δ = 6.84 (m, 1 H), 6.04-6.21 (m, 2 H), 5.21 (d, *J* = 16.0 Hz, 1 H), 2.18 (m, 2 H), 1.34 (m, 4 H), 0.88 (t, *J* = 7.0 Hz, 3 H). For (2Z,4E): <sup>1</sup>H NMR (250 MHz, CDCl<sub>3</sub>) δ = 6.77 (dd, *J* = 10.9, 10.9 Hz, 1 H), 6.47-6.58 (m, 1 H), 6.04-6.21 (m, 1 H), 5.07 (d, *J* = 10.9 Hz, 1 H), 2.18 (m, 2 H), 1.34 (m, 4 H), 0.89 (t, *J* = 7.0 Hz, 3 H); Anal. calcd for C<sub>9</sub>H<sub>13</sub>N: C 79.95, H 9.69, N 10.36, found: C 79.95, H 9.70, N 10.35

**(2E,4E)-2-Methyl-nona-2,4-dienoic acid tert-butyl ester (12):** Following the general procedure A, cross coupling reaction of boronic ester **1** with *tert*-butyl methacrylate afforded diene **12** (90%): <sup>1</sup>H NMR (250 MHz, CDCl<sub>3</sub>) δ = 7.04 (d, *J* = 11.3 Hz, 1 H), 6.29 (dd, *J* = 14.8, 11.4 Hz, 1 H), 5.92 (m, 1 H), 2.18 (m, 2 H), 1.85 (s, 3 H), 1.46 (s, 9 H), 1.33 (m, 4 H), 0.88 (t, *J* = 7.0 Hz, 3 H); <sup>13</sup>C NMR (63 MHz, CDCl<sub>3</sub>) δ = 167.9, 142.5, 137.8, 126.5, 126.1, 79.9, 32.9, 31.1, 28.1, 22.2, 13.8, 12.5; Anal. calcd for C<sub>14</sub>H<sub>24</sub>O<sub>2</sub>: C 74.95, H 10.78, found: C 74.89, H 10.68

**(2E,4E)-3-Methyl-nona-2,4-dienoic acid ethyl ester (13):** Following the general procedure **A**, cross coupling reaction of boronic ester **1** with ethyl crotonate afforded diene **12** (89%): <sup>1</sup>H NMR (250 MHz, CDCl<sub>3</sub>) δ = 6.08 (m, 1 H), 5.66 (s, 1 H), 4.13 (q, 2 H, *J* = 7.2 Hz), 2.24 (s, 3 H), 2.15 (m, 2 H), 1.31 (m, 4 H), 1.25 (t, *J* = 7.2 Hz, 3 H), 0.87 (t, *J* = 7.0 Hz, 3 H); <sup>13</sup>C NMR (63 MHz, CDCl<sub>3</sub>) δ = 167.9, 142.5, 137.8, 126.5, 126.1, 79.9, 32.9, 31.1, 22.2, 14.3, 13.9, 13.8; Anal. calcd for C<sub>12</sub>H<sub>20</sub>O<sub>2</sub>: C 73.43, H 10.27, found: C 73.41, H 10.28.

**(1E,3E)-(1-Methyl-octa-1,3-dienyl)-benzene and (3E)-(1-Methylene-oct-3-enyl)-benzene (14):** Following the general procedure **A**, cross coupling reaction of boronic ester **1** with *a*-methylstyrene afforded an inseparable mixture of dienes **14** (50%, **14a**(1E,3E) : **14b**(3E) = 1 : 2.8). <sup>1</sup>H NMR (250 MHz, CDCl<sub>3</sub>) δ = 7.21- 7.45 (m, 5 H, Ph), 6.42 (for **14a**, m), 5.84 (for **14a**, m), 5.49 (for **14b**, m), 5.34 (for **14b**, br s), 5.07 (for **14b**, d, *J* = 1.4 Hz), 2.14 (for **14a**, s), 1.99 (m, 2 H), 1.29 (m, 4 H), 0.88 (m, 3 H).

**(1E,3E)- and (1Z,3E)-(2-Methyl-octa-1,3-dienyl)-benzene (15):** Following the general procedure **A**, cross coupling reaction of boronic ester **1** with *trans*-*b*-methylstyrene afforded an inseparable mixture of dienes **15** (52%, (1E,3E):(1Z,3E) = 6:1): <sup>1</sup>H NMR (250 MHz, CDCl<sub>3</sub>) δ = 7.24 (m, 5 H, Ph), 6.57 (for (1Z,3E), d, *J* = 15.7 Hz) and 6.22 (for (1E,3E), dd, *J* = 15.5, 1.1 Hz), 6.40 (for (1E,3E), s) and 6.33 (for (1Z,3E), s), 5.77 (dt, *J* = 15.5, 7.1 Hz, 2 H), 2.15 (m, 2 H), 1.97 (d, *J* = 1.1 Hz, 3 H), 1.35 (m, 4 H), 0.89 (t, *J* = 7.0 Hz, 3 H).

**(2E,4E)-6-(tert-Butyl-diphenyl-silyloxy)-hexa-2,4-dienoic acid tert-butyl ester (18):** Following the general procedure **A**, cross coupling reaction of boronic ester **17**, prepared from propargyl alcohol through TBDPS protection, hydroboration with catechol borane, and pinacol esterification, with *tert*-butyl acrylate afforded diene **18** (92%): <sup>1</sup>H NMR (250 MHz,

CDCl<sub>3</sub>)  $\delta$  = 7.65-7.34 (m, 10 H, Ph), 7.19 (dd,  $J$  = 15.3, 11.4 Hz, 1 H), 6.46 (dd, 15.2, 11.4 Hz, 1 H), 6.10 (dt,  $J$  = 15.2, 2.4 Hz, 1 H), 4.29 (d,  $J$  = 2.4 Hz, 2 H), 1.47 (s, 9 H), 1.04 (s, 9 H); <sup>13</sup>C NMR (63 MHz, CDCl<sub>3</sub>)  $\delta$  = 166.5, 143.0, 140.6, 135.4, 133.2, 129.7, 127.7, 126.8, 122.7, 80.2, 63.6, 28.1, 26.7, 19.2.

**(2E,4E)-7-Hydroxy-octa-2,4-dienoic acid *tert*-butyl ester (20):** Following the general procedure A, cross coupling reaction of boronic ester **19**, prepared from 4-pentyn-2-ol through TMS protection, hydroboration with catechol borane, and pinacol esterification, with *tert*-butyl acrylate afforded diene **20** (81%): <sup>1</sup>H NMR (250 MHz, CDCl<sub>3</sub>)  $\delta$  = 7.14 (dd,  $J$  = 15.3, 10.5 Hz, 1 H), 6.20 (dd,  $J$  = 15.1, 10.5 Hz, 1 H), 6.06 (dt,  $J$  = 15.1, 7.0 Hz, 1 H), 5.73 (d,  $J$  = 15.3 Hz, 1 H), 3.88 (m, 1 H), 2.30 (m, 2 H), 1.46 (s, 9 H), 1.20 (d,  $J$  = 6.2 Hz, 3 H); <sup>13</sup>C NMR (63 MHz, CDCl<sub>3</sub>)  $\delta$  = 166.4, 143.2, 138.8, 131.1, 122.2, 80.2, 67.1, 42.6, 28.1, 23.0; Anal. calcd for C<sub>12</sub>H<sub>20</sub>O<sub>3</sub>: C 67.89, H 9.50, found: C 67.71, H 9.54

**2-Isopropenyl pinacol boronic ester (21):** Following the known procedure,<sup>25</sup> isopropenyl bromide was converted to 2-isopropenyl boronic acid, which was treated pinacol affording a corresponding pinacol boronic ester **21**: <sup>1</sup>H NMR (250 MHz, CDCl<sub>3</sub>)  $\delta$  = 5.7 (br s, 1 H), 5.61 (br s, 1 H), 1.79 (dd,  $J$  = 1.31, 1.26 Hz, 3 H), 1.25 (s, 12 H).

**(2E)-4-Methyl-penta-2,4-dienoic acid *tert*-butyl ester (22):** Following the general procedure A, cross coupling reaction of boronic ester **21** with *tert*-butyl acrylate afforded diene **22** (86%): <sup>1</sup>H NMR (250 MHz, CDCl<sub>3</sub>)  $\delta$  = 7.24 (d,  $J$  = 15.7 Hz, 1 H), 5.78 (d,  $J$  = 15.7 Hz, 1 H), 5.28 (m, 2 H), 1.85 (s, 3 H), 1.48 (s, 9 H); <sup>13</sup>C NMR (63 MHz, CDCl<sub>3</sub>)  $\delta$  = 166.5, 145.9, 140.5, 123.6, 120.6, 80.3, 46.3, 30.9, 28.1, 18.1; Anal. calcd for C<sub>10</sub>H<sub>16</sub>O<sub>2</sub>: C 71.39, H 9.59, found: C 71.41, H 9.62

***trans*-2-phenylvinyl pinacol boronic ester (23)**: Pinacol was added to a solution of commercially available *trans*-2-phenyl boronic acid in THF at room temperature. After stirred for 3 hours, the reaction mixture was concentrated *in vacuo* and chromatographed on silica gel to afford pinacol boronic ester compound **23** as colorless oil in quantitative yield: <sup>1</sup>H NMR (250 MHz, CDCl<sub>3</sub>) δ = 7.24-7.49 (m, 6 H), 6.15 (d, *J* = 18.4 Hz, 1 H), 1.30 (s, 12 H); <sup>13</sup>C-NMR (63 MHz, CDCl<sub>3</sub>) δ = 149.5, 137.4, 128.9, 127.1, 83.4, 24.8.

**(2*E*,4*E*)-5-Phenyl-penta-2,4-dienoic acid *tert*-butyl ester (24)**: Following the general procedure **A**, cross coupling reaction of boronic ester **23** with *tert*-butyl acrylate afforded diene **24** (81%): <sup>1</sup>H NMR (250 MHz, CDCl<sub>3</sub>) δ = 7.21-7.39 (m, 6 H), 6.77 (m, 2 H), 5.85 (d, *J* = 15.2 Hz, 1 H), 1.44 (s, 9 H); <sup>13</sup>C NMR (63 MHz, CDCl<sub>3</sub>) δ = 166.4, 143.5, 139.7, 136.1, 128.9, 128.8, 127.1, 126.3, 123.3, 80.3, 28.2; Anal. calcd for C<sub>15</sub>H<sub>19</sub>O<sub>2</sub>: C 78.23, H 7.88, found: C 78.34, H 7.82

**(*IZ*)-2-Hex-1-enyl-4,4,5,5-tetramethyl-[1,3,2]dioxaborolane (25)**.<sup>25</sup> A two neck flask was charged with [Rh(cod)Cl<sub>2</sub>]<sub>2</sub> (43 mg, 0.015 eq) and then flushed with nitrogen. Cyclohexane, P(*i*-Pr)<sub>3</sub> (67 mL, 0.06 eq.), TEA (0.82 mL, 1 eq.), and catechol borane (0.65 mL, 5.8 mmol) were successively added and the mixture was stirred for 30 minutes at room temperature. 1-Hexyne (0.58 g, 1.2 eq.) was added and the reaction mixture was stirred for 4 hours at room temperature. After addition of pinacol (1.0 g, 1.5 eq.), the resulting reaction mixture was stirred for additional 12 hours, concentrated *in vacuo* and chromatographed on silica gel to give *cis*-pinacol boronic ester **25** as colorless oil; <sup>1</sup>H NMR (250 MHz, CDCl<sub>3</sub>) δ = 6.40 (dt, *J* = 13.4, 6.6 Hz, 1 H), 5.30 (dt, *J* = 13.4, 1.1 Hz, 1 H), 2.38 (m, 2 H), 1.31 (m, 4 H), 1.24 (s, 12 H), 0.87 (t, *J* = 7.0 Hz, 3 H).

**(2E,4Z)-Nona-2,4-dienoic acid *tert*-butyl ester (26):** Following the general procedure **A**, cross coupling reaction of boronic ester **25** with *tert*-butyl acrylate afforded diene **26** (91%): <sup>1</sup>H NMR (250 MHz, CDCl<sub>3</sub>) δ = 7.50 (ddd, *J* = 15.3, 11.5, 0.7 Hz, 1 H), 6.06 (dd, *J* = 11.0, 10.9 Hz, 1 H), 5.79 (m, 1 H), 5.77 (d, *J* = 15.3 Hz, 1 H), 2.25 (m, 2 H), 1.46 (s, 9 H), 1.34 (m, 4 H), 0.89 (t, *J* = 7.0 Hz, 3 H); <sup>13</sup>C NMR (63 MHz, CDCl<sub>3</sub>) δ = 166.8, 141.0, 138.5, 126.3, 122.9, 80.1, 31.5, 28.1, 27.9, 22.3, 13.9.

**General procedure B for the coupling reaction with pinacolboronic ester and olefin in the presence of 1,10-phenanthroline as a ligand:** To a premixed solution of palladium acetate (0.025 mole) and 1,10-phenanthroline as a ligand (0.028 mmol) in DMF (2.5 mL) for 30 minutes, were added olefin (1.5 mmol) and pinacolboronic ester (0.5 mmol). The reaction flask was fitted with an oxygen balloon and the reaction mixture was stirred at room temperature for 12 hours, then diluted with ethyl acetate (20 mL), and washed with water and brine (2 X 10 mL). The separated organic layer was dried over anhydrous Na<sub>2</sub>SO<sub>4</sub> and filtered. The filtrate was concentrated *in vacuo* and the residue was chromatographed on silica gel to give a cross-coupled product.

**(3E,5E)-Deca-3,5-dien-2-one (27):** Following the general procedure **B**, cross coupling reaction of boronic ester **1** with methyl vinyl ketone afforded diene **27** (88%). <sup>1</sup>H NMR (250 MHz, CDCl<sub>3</sub>) δ = 7.01 (m, 1 H), 6.10 (m, 2 H), 5.96 (d, *J* = 15.5 Hz, 1 H), 2.17 (s, 3H), 2.11 (m, 2 H), 1.30 (m, 4 H), 0.82 (t, *J* = 7.0 Hz, 3 H); <sup>13</sup>C NMR (63 MHz, CDCl<sub>3</sub>) δ = 198.9, 145.8, 144.1, 128.8, 128.7, 32.8, 30.7, 27.1, 22.2, 13.8; Anal. calcd for C<sub>10</sub>H<sub>16</sub>O: C 78.90, H 10.59, found: C 78.89, H 10.60.



**(E)-tert-Butyl 3-phenylpropenoate (28):** Following the general procedure **B**, cross coupling reaction of phenylboronic acid with *tert*-butyl acrylate afforded **28** (87%): <sup>1</sup>H NMR (300 MHz, CDCl<sub>3</sub>) δ = 7.58 (d, *J* = 16.0 Hz, 1 H), 7.50 (m, 2H), 7.37 (m, 3H), 6.37 (d, *J* = 16.0 Hz, 1 H), 1.54 (s, 9 H); <sup>13</sup>C NMR (63 MHz, CDCl<sub>3</sub>) δ = 166.3, 143.5, 134.6, 129.9, 128.7, 127.9, 120.1, 80.4, 28.1; Anal. calcd for C<sub>13</sub>H<sub>16</sub>O<sub>2</sub>: C 76.44, H 7.90, found: C 76.43, H 7.92

**(E)-4-Phenylbut-3-en-2-one (33):** Following the general procedure **B**, cross coupling reaction of phenylboronic acid with methyl vinyl ketone afforded **33** (71%): <sup>1</sup>H NMR (400 MHz, CDCl<sub>3</sub>) δ = 7.54 (m, 2 H), 7.50 (d, *J* = 10.3 Hz, 1 H), 7.40 (m, 3 H), 6.72 (d, *J* = 10.2 Hz, 1 H), 2.39 (s, 3 H); <sup>13</sup>C NMR (100 MHz, CDCl<sub>3</sub>) δ = 198.7, 143.7, 134.6, 130.7, 129.2, 128.5, 127.4, 27.7; Anal. calcd for C<sub>10</sub>H<sub>10</sub>O: C 82.16, H 6.89, found: C 82.08, H 6.92

**(E)-Cinnamamide (34):** Following the general procedure **B**, cross coupling reaction of phenylboronic acid with acrylamide afforded **34** (64%): <sup>1</sup>H NMR 300 MHz, CDCl<sub>3</sub>) δ = 7.64 (d, *J* = 15.7 Hz, 1 H), 7.52 (m, 2 H), 7.38 (m, 3 H), 6.46 (d, *J* = 15.7 Hz, 1 H), 5.57 (br, 2 H); <sup>13</sup>C NMR (75.5 MHz, CDCl<sub>3</sub>) δ = 167.8, 142.5, 134.4, 129.9, 128.8, 127.9, 119.4; Anal. calcd for C<sub>9</sub>H<sub>9</sub>NO: C 73.45, H 6.16, N 9.52, found: C 73.37, H 6.18, N 9.49.

**(E)-1,2-Diphenylethene (35):** Following the general procedure **B**, cross coupling reaction of phenylboronic acid with styren afforded **35** (85%): <sup>1</sup>H NMR (400 MHz, CDCl<sub>3</sub>) δ = 7.51 (d, *J* = 4.75 Hz, 4 H), 7.35 (t, *J* = 5.0 Hz, 4 H), 7.24 (m, 2 H), 7.10 (s, 2 H); <sup>13</sup>C NMR (100 MHz, CDCl<sub>3</sub>) δ = 137.5, 128.9, 128.8, 127.8, 126.7; Anal. calcd for C<sub>14</sub>H<sub>12</sub>: C 93.29, H 6.71, found: C 92.97, H 6.85

**Cinnamionitrile (36):** Following the general procedure **B**, cross coupling reaction of phenylboronic acid with acrylnitrile afforded **36** (84%):  $^1\text{H}$  NMR (400 MHz,  $\text{CDCl}_3$ )  $\delta = 7.41$  (m, 6 H), 5.86 (d,  $J = 10.5$  Hz, 1 H);  $^{13}\text{C}$  NMR (100 MHz,  $\text{CDCl}_3$ )  $\delta = 150.8, 133.7, 131.4, 129.3, 127.5, 118.3, 96.5$ ; Anal. calcd for  $\text{C}_9\text{H}_7\text{N}$ : C 83.69, H 5.46, N 10.84, found: C 83.65, H 5.52, N 10.82

**1-[(Cinnamyl-oxy) methyl] benzene (37):** Following the general procedure **B**, cross coupling reaction of phenylboronic acid with allylic benzyl ether afforded **37** (78%):  $^1\text{H}$  NMR (250 MHz,  $\text{CDCl}_3$ )  $\delta = 4.21$  (d,  $J = 4.2$  Hz, 2H), 4.58 (s, 2H), 6.35 (td,  $J = 4.5$  Hz, 12.0 Hz, 1H), 6.64 (d,  $J = 12.0$  Hz, 1H), 7.25 - 7.35 (m, 10H);  $^{13}\text{C}$  NMR (63 MHz,  $\text{CDCl}_3$ )  $\delta = 70.6, 72.1, 126.5, 126.7, 128.1, 128.6, 132.4, 136.7, 138.5$

**tert-Butyl 2-benzylacrylate (38):** Following the general procedure **B**, cross coupling reaction of phenylboronic acid with *tert*-butyl methacrylate afforded **38** (85%; coupled:migrated = 1:1.4):  $^1\text{H}$  NMR (400 MHz,  $\text{CDCl}_3$ )  $\delta = 7.35$  (m, 2 H), 7.22 (m, 3 H), 6.14 (s, 1 H), 5.34 (d,  $J = 0.75$  Hz, 1 H), 3.57 (s, 2 H), 1.41 (s, 9 H).

**(E)-Ethyl 3-phenylbut-2-enoate (39):** Following the general procedure **B**, cross coupling reaction of phenylboronic acid with ethyl crotonate afforded **39** (82%):  $^1\text{H}$  NMR (300 MHz,  $\text{CDCl}_3$ )  $\delta = 7.49$  (m, 2 H), 7.37 (m, 3 H), 6.13 (q,  $J = 1.25$  Hz, 1 H), 4.21 (q,  $J = 7.25$  Hz, 2 H), 2.57 (d,  $J = 1.5$  Hz, 3 H), 1.31 (t,  $J = 7.25$  Hz, 3 H);  $^{13}\text{C}$  NMR (63 MHz,  $\text{CDCl}_3$ )  $\delta = 166.8, 155.4, 142.2, 128.9, 128.4, 126.2, 117.1, 59.8, 17.9, 14.3$ ; Anal. calcd for  $\text{C}_{12}\text{H}_{14}\text{O}_2$ : C 75.76, H 7.42, found: C 75.77, H 7.45

**General procedure C for the coupling reaction with arylboronic acid and olefin in the presence of 2,9-dimethyl-phenanthroline as a ligand:** To a premixed solution of palladium acetate (0.025 mole) and 2,9-dimethyl-phenanthroline as a ligand (0.028 mmol) in DMF (2.5 mL) for 30 minutes, were added olefin (1.5 mmol) and arylboronic acid (0.5 mmol). The reaction flask was fitted with an oxygen balloon and the reaction mixture was stirred at room temperature for 12 hours, then diluted with ethyl acetate (20 mL), and washed with water and brine (2 X 10 mL). The separated organic layer was dried over anhydrous Na<sub>2</sub>SO<sub>4</sub> and filtered. The filtrate was concentrated *in vacuo* and the residue was chromatographed on silica gel to give a cross-coupled product.

**(E)-tert-Butyl 3-(4-methoxyphenyl) acrylate (31):** Following the general procedure C, cross coupling reaction of 4-methoxyphenyl boronic acid with *tert*-butyl acrylate afforded **31** (61%): <sup>1</sup>H NMR (400 MHz, CDCl<sub>3</sub>) δ = 7.52 (d, *J* = 16.0 Hz, 1 H), 7.43 (d, *J* = 8.4 Hz, 1H), 6.86 (d, *J* = 8.4 Hz, 1 H), 6.22 (d, *J* = 16.0 Hz, 1 H), 3.81 (s, 3 H), 1.51 (s, 9 H); <sup>13</sup>C NMR (100 MHz, CDCl<sub>3</sub>) δ = 166.9, 161.3, 143.4, 129.7, 127.6, 117.9, 114.4, 80.4, 55.5, 28.4; Anal. calcd for C<sub>14</sub>H<sub>18</sub>O<sub>3</sub>: C 71.77, H 7.74, found: C 71.78, H 7.74

**(E)-tert-Butyl 3-(3-acetylphenyl) acrylate (32):** Following the general procedure C, cross coupling reaction of 3-acetyl phenylboronic acid with *tert*-butyl acrylate afforded **32** (72%): <sup>1</sup>H NMR (400 MHz, CDCl<sub>3</sub>) δ = 8.05 (s, 1 H), 7.91 (d, *J* = 7.6 Hz, 1 H), 7.66 (d, *J* = 7.6 Hz, 1 H), 7.52 (d, *J* = 16.4 Hz, 1 H), 7.45 (t, *J* = 8Hz, 1 H), 6.42 (d, *J* = 16 Hz, 1 H), 2.60 (s, 3 H), 1.51 (s, 9 H); <sup>13</sup>C NMR (100 MHz, CDCl<sub>3</sub>) δ = 197.7, 166.1, 142.5, 137.8, 135.4, 132.3, 129.7, 129.3, 127.7, 121.8, 81.0, 28.3, 26.8; Anal. calcd for C<sub>15</sub>H<sub>18</sub>O<sub>3</sub>: C 73.15, H 7.37, found: C 73.13, H 7.39

**(E)-tert-Butyl 3-(4-dimethylamino phenyl) acrylate (40):** Following the general procedure C, cross coupling reaction of 4-(dimethylamino)phenylboronic acid with *tert*-butyl acrylate afforded phenyl olefin **40** (94%):  $^1\text{H}$  NMR (400 MHz,  $\text{CDCl}_3$ )  $\delta = 7.50$  (d,  $J = 16.0$  Hz, 1 H), 7.38 (d,  $J = 8.8$  Hz, 2 H), 6.64 (d,  $J = 8.8$  Hz, 2 H), 6.13 (d,  $J = 16.0$  Hz, 1 H), 2.98 (s, 6 H), 1.50 (s, 9 H);  $^{13}\text{C}$  NMR (100 MHz,  $\text{CDCl}_3$ )  $\delta = 167.5, 151.7, 144.2, 129.7, 122.7, 114.8, 112.0, 79.9, 40.3, 28.5$ ; Anal. calcd for  $\text{C}_{15}\text{H}_{21}\text{NO}_2$ : C 72.84, H 8.56, N 5.66, found: C 72.85, H 8.54, N 5.67.

**(E)-tert-Butyl 3-(4-acetylphenyl) acrylate (41):** Following the general procedure C, cross coupling reaction of 4-acetylphenyl boronic acid with *tert*-butyl acrylate afforded **41** (71%):  $^1\text{H}$  NMR (400 MHz,  $\text{CDCl}_3$ )  $\delta = 7.95$  (d,  $J = 8.5$  Hz, 2 H), 7.59 (d,  $J = 16.0$  Hz, 1 H), 7.57 (d,  $J = 8.5$  Hz, 2 H), 6.45 (d,  $J = 16.0$  Hz, 1 H), 2.60 (s, 3 H), 1.53 (s, 9 H);  $^{13}\text{C}$  NMR (100 MHz,  $\text{CDCl}_3$ )  $\delta = 197.3, 165.7, 141.9, 139.0, 137.7, 128.7, 127.9, 122.7, 80.9, 28.1, 26.6$ ; Anal. calcd for  $\text{C}_{15}\text{H}_{18}\text{O}_3$ : C 73.15, H 7.37, found: C 73.14, H 7.38

**(E)-tert-Butyl 3-(4-nitrophenyl) acrylate (42):** Following the general procedure C, cross coupling reaction of 4-nitrophenyl boronic acid with *tert*-butyl acrylate afforded **42** (57%):  $^1\text{H}$  NMR (400 MHz,  $\text{CDCl}_3$ )  $\delta = 8.23$  (d,  $J = 9.0$  Hz, 2 H), 7.65 (d,  $J = 8.5$  Hz, 2 H), 7.59 (d,  $J = 16.0$  Hz, 1 H), 6.48 (d,  $J = 16.0$  Hz, 1 H), 1.54 (s, 9 H);  $^{13}\text{C}$  NMR (100 MHz,  $\text{CDCl}_3$ )  $\delta = 164.8, 140.9, 140.5, 130.0, 128.4, 124.5, 124.1, 81.3, 28.1$ ; Anal. calcd for  $\text{C}_{13}\text{H}_{15}\text{NO}_4$ : C 62.64, H 6.07, N 5.62, found: C 62.63, H 6.09, N 5.62.

**(E)-tert-Butyl 3-(4-cyanophenyl) acrylate (43):** Following the general procedure C, cross coupling reaction of 4-cyanophenyl boronic acid with *tert*-butyl acrylate afforded **43** (69%):  $^1\text{H}$  NMR (400 MHz,  $\text{CDCl}_3$ )  $\delta = 7.65$  (d,  $J = 8.2$  Hz, 2 H), 7.58 (d,  $J = 8.2$  Hz, 2 H), 7.56 (d,

$J = 15.8$  Hz, 1 H), 6.44 (d,  $J = 16.0$  Hz, 1 H), 1.53 (s, 9 H);  $^{13}\text{C}$  NMR (100 MHz,  $\text{CDCl}_3$ )  $\delta = 165.3, 141.0, 139.0, 132.5, 131.6, 128.2, 123.8, 113.0, 81.2, 28.1$ ; Anal. calcd for  $\text{C}_{14}\text{H}_{15}\text{NO}_2$ : C 73.34, H 6.59, N 6.11, found: C 73.33, H 6.60, N 6.10

**(E)-tert-Butyl 3-o-tolylacrylate (44):** Following the general procedure C, cross coupling reaction of *o*-toluylboronic acid with *tert*-butyl acrylate afforded **44** (84%):  $^1\text{H}$  NMR (400 MHz,  $\text{CDCl}_3$ )  $\delta = 7.87$  (d,  $J = 16.0$  Hz, 1 H), 7.52 (d,  $J = 7.2$  Hz, 1 H), 7.22 (m, 3 H), 6.27 (d,  $J = 15.6$  Hz, 1 H), 2.41 (s, 3 H), 1.52 (s, 9 H);  $^{13}\text{C}$  NMR (100 MHz,  $\text{CDCl}_3$ )  $\delta = 166.8, 141.4, 137.7, 133.7, 130.9, 129.9, 126.5, 126.4, 121.3, 80.7, 28.4, 13.9$ ; Anal. calcd for  $\text{C}_{14}\text{H}_{18}\text{O}_2$ : C 77.03, H 8.31, O 14.66, found: C 77.01, H 8.31

**(2E)-2-Propenoic acid, 3-[1-(phenylsulfonyl)-1H-indol-3-yl]-1,1-dimethylethyl ester (45):** Following the general procedure C, cross coupling reaction of 1-(Phenylsulfonyl)-3-indoleboronic acid with *tert*-butyl acrylate afforded phenyl olefin **45** (63%):  $^1\text{H}$  NMR (400 MHz,  $\text{CDCl}_3$ )  $\delta = 7.99$  (d,  $J = 8.4$  Hz, 1 H), 7.89 (d,  $J = 7.6$  Hz, 2 H), 7.80 (s, 1 H), 7.79 (d,  $J = 8.8$  Hz, 1 H), 7.66 (d,  $J = 16.0$  Hz, 1 H), 7.55 (t,  $J = 7.6$  Hz, 1 H), 7.45 (t, 8.0 Hz, 2 H), 7.36 (t,  $J = 7.6$  Hz, 1 H), 7.31 (t,  $J = 7.6$  Hz, 1 H), 6.44 (d,  $J = 16.0$  Hz, 1 H), 1.52 (s, 9 H).

**(2E)-2-Propenoic acid, 3-[1-(phenylsulfonyl)-1H-indol-2-yl]-1,1-dimethylethyl ester (46):** Following the general procedure C, cross coupling reaction of 1-(phenylsulfonyl)-2-indolboronic acid with *tert*-butyl acrylate afforded phenyl olefin **46** (49%) at room temperature under molecular oxygen.;  $^1\text{H}$  NMR (400 MHz,  $\text{CDCl}_3$ )  $\delta = 8.24$  (d,  $J = 16.0$  Hz, 1H), 8.21 (d,  $J = 8.4$  Hz, 1H), 7.74 (d,  $J = 7.2$  Hz, 2H), 7.52 – 7.25 (m, 6H), 6.93 (s, 1H), 6.28 (d,  $J = 16.0$  Hz, 1H), 1.55 (s, 9H).

**(1E)-3-Hex-1-enyl-cyclohex-2-enone (47):** Following the general procedure **A**, cross coupling reaction of boronic ester **1** with cyclohexenone afforded diene **44** (37%). Following the general procedure **B**, cross coupling reaction of boronic ester **1** with cyclohexenone afforded diene **47** for 2 hours (82%):  $^1\text{H}$  NMR (250 MHz,  $\text{CDCl}_3$ )  $\delta$  = 6.19 (m, 2 H), 5.85 (s, 1 H), 2.41 (m, 4 H), 2.16 (m, 2 H), 2.00 (m, 2 H), 1.35 (m, 4 H), 0.89 (t,  $J$  = 7.0 Hz, 3 H);  $^{13}\text{C}$  NMR (63 MHz,  $\text{CDCl}_3$ )  $\delta$  = 200.5, 157.7, 139.2, 131.3, 126.4, 37.7, 32.9, 31.0, 25.0, 22.3, 22.2, 13.9; Anal. calcd for  $\text{C}_{12}\text{H}_{18}\text{O}$ : C 80.85, H 10.18, found: C 80.82, H 10.19

**(1E)-3-Phenyl-cyclohex-2-enone (48):** Following the general procedure **B**, cross coupling reaction of phenylboronic acid with cyclohexenone afforded **48** (81%):  $^1\text{H}$  NMR (300 MHz,  $\text{CDCl}_3$ )  $\delta$  = 2.14 (q,  $J$  = 6.8 Hz, 2 H), 2.47 (t,  $J$  = 6.8 Hz, 2 H), 2.76 (t,  $J$  = 5.6 Hz, 2H), 6.40 (s, 1H), 7.39 (m, 3H), 7.52 (m, 2H);  $^{13}\text{C}$  NMR (75.5 MHz,  $\text{CDCl}_3$ )  $\delta$  = 199.9, 159.8, 138.6, 130.0, 128.7, 126.0, 125.3, 115.4, 37.1, 28.0, 22.7; Anal. calcd for  $\text{C}_{12}\text{H}_{12}\text{O}$ : C 83.69, H 7.02, found: C 83.69, H 7.05

**(E)-tert-Butyl 3-(4-iodophenyl) acrylate (51):** Following the general procedure **C**, cross coupling reaction of 4-iodophenylboronic acid with *tert*-butyl acrylate afforded phenyl olefin **51** (81%):  $^1\text{H}$  NMR (400 MHz,  $\text{CDCl}_3$ )  $\delta$  = 7.70 (d,  $J$  = 8.2 Hz, 2 H), 7.48 (d,  $J$  = 16.0 Hz, 1 H), 7.22 (d,  $J$  = 8.2 Hz, 2 H), 6.35 (d,  $J$  = 16.0 Hz, 1 H), 1.52 (s, 9 H);  $^{13}\text{C}$  NMR (75.5 MHz,  $\text{CDCl}_3$ )  $\delta$  = 166.0, 142.2, 138.0, 134.1, 129.4, 120.9, 96.0, 80.1, 28.1; Anal. calcd for  $\text{C}_{13}\text{H}_{15}\text{IO}_2$ : C 47.29, H 4.58, I 38.44, found: C 47.32, H 4.59, I 38.35.

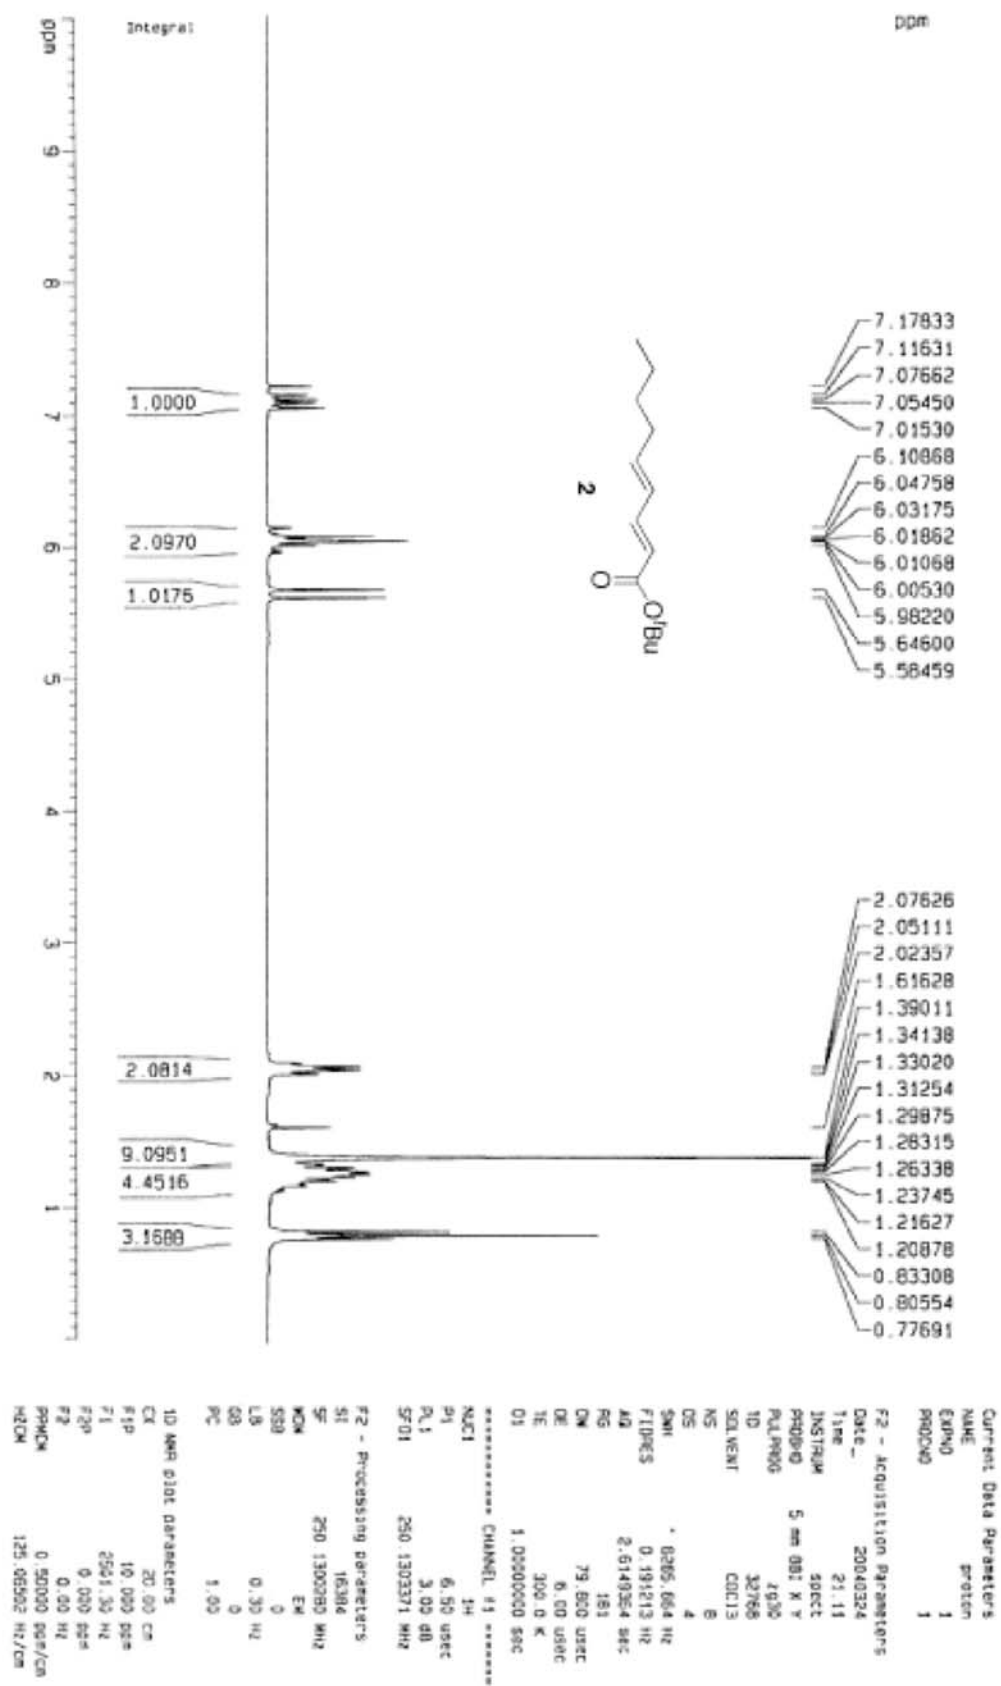

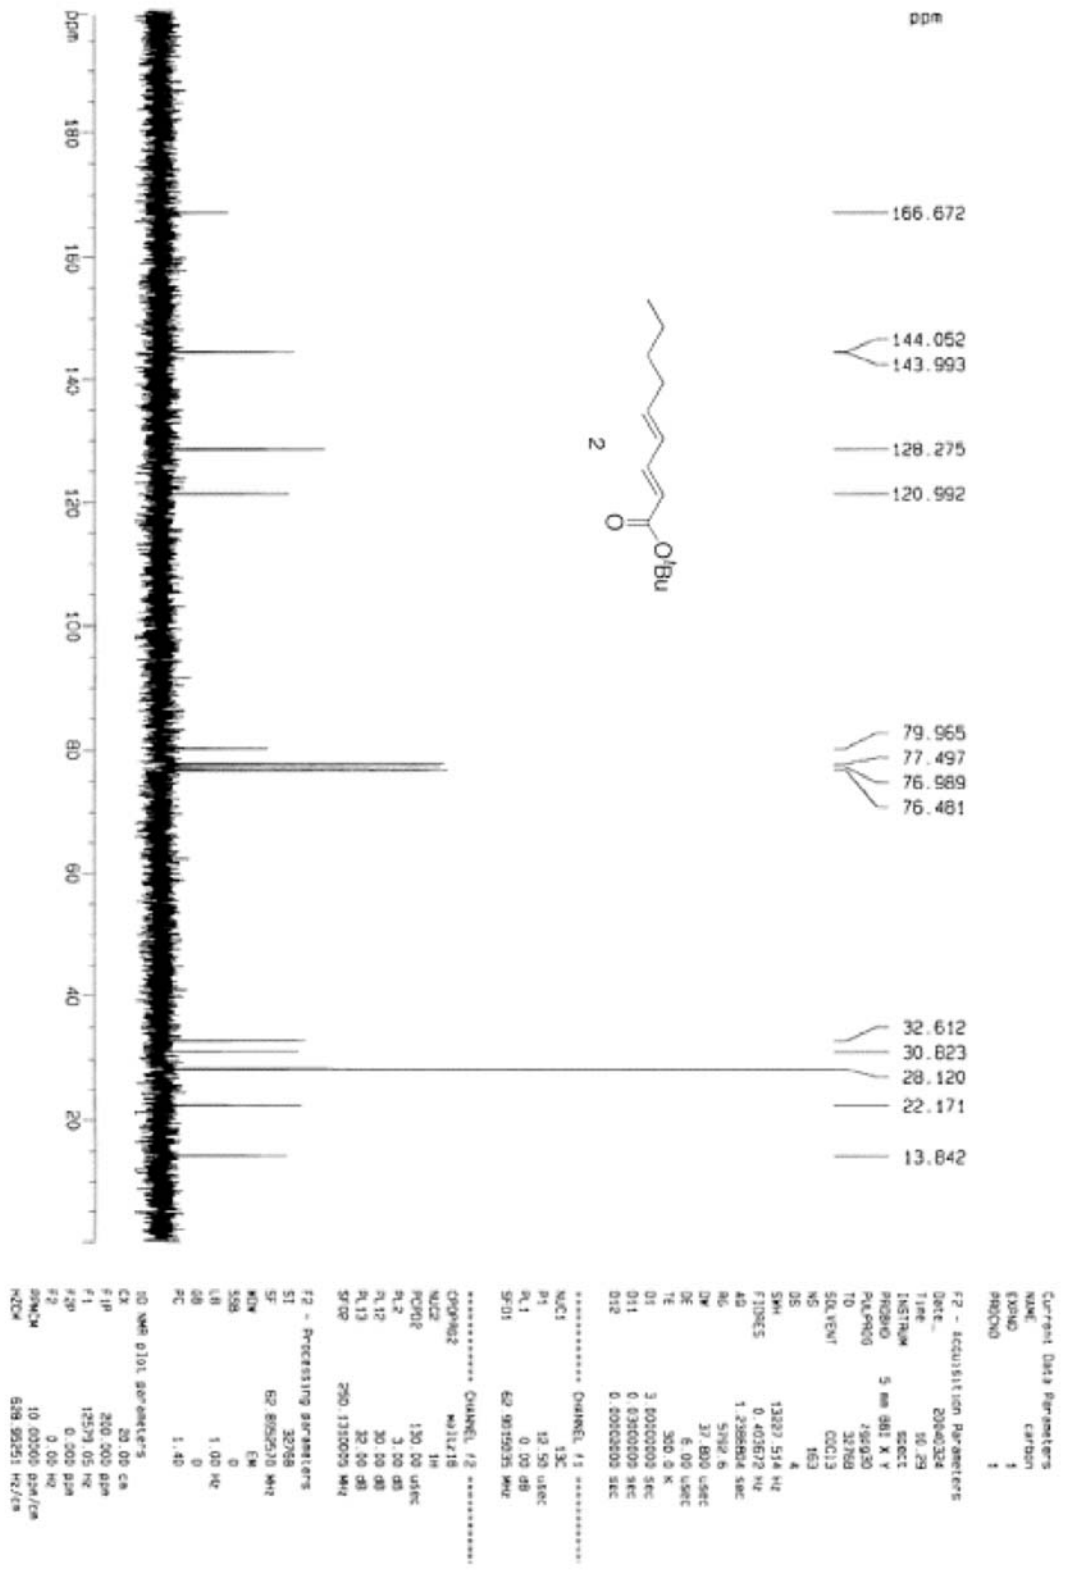

Current Data Parameters  
 NAME Carbon  
 EXNO 1  
 PROCNO 1

F2 - Acquisition Parameters  
 DATE\_ 20040324  
 TIME 10:29  
 INSTRUM spect  
 PROBRW 5 mm BB1 X Y  
 PULPROG zgpg30  
 TO 38768  
 SOLVENT CDCl3  
 NS 163  
 DS 4  
 SWH 13227.514 Hz  
 FIDRES 0.401672 Hz  
 AQ 1.2366804 sec  
 RG 5192.6  
 DW 37.800 usec  
 DE 6.00 usec  
 TE 300.2 K  
 D1 3.0000000 sec  
 D11 0.0300000 sec  
 D12 0.0000000 sec

\*\*\*\*\* CHANNEL f1 \*\*\*\*\*  
 NUC1 13C  
 P1 12.50 usec  
 PL1 0.00 dB  
 PRF01 62.9875000 MHz

\*\*\*\*\* CHANNEL f2 \*\*\*\*\*  
 CHPROG2 MLEV16  
 NUC2 1H  
 PULPR2 130.00 usec  
 PL2 3.00 dB  
 PL12 20.00 dB  
 PL13 22.00 dB  
 PRF02 290.1300000 MHz

F2 - Processing parameters  
 SI 32768  
 SF 62.896200 MHz  
 KW 64  
 SSB 0  
 GB 1.00 Hz  
 DB 0  
 PC 1.40

30 mm QNP 131C spect  
 CX 20.00 cm  
 F1P 200.000 MHz  
 F1 125.7605 MHz  
 F2P 0.000 MHz  
 F2 0.00 MHz  
 GPMCM 10.0000000 MHz  
 N2CM 628.993231 MHz



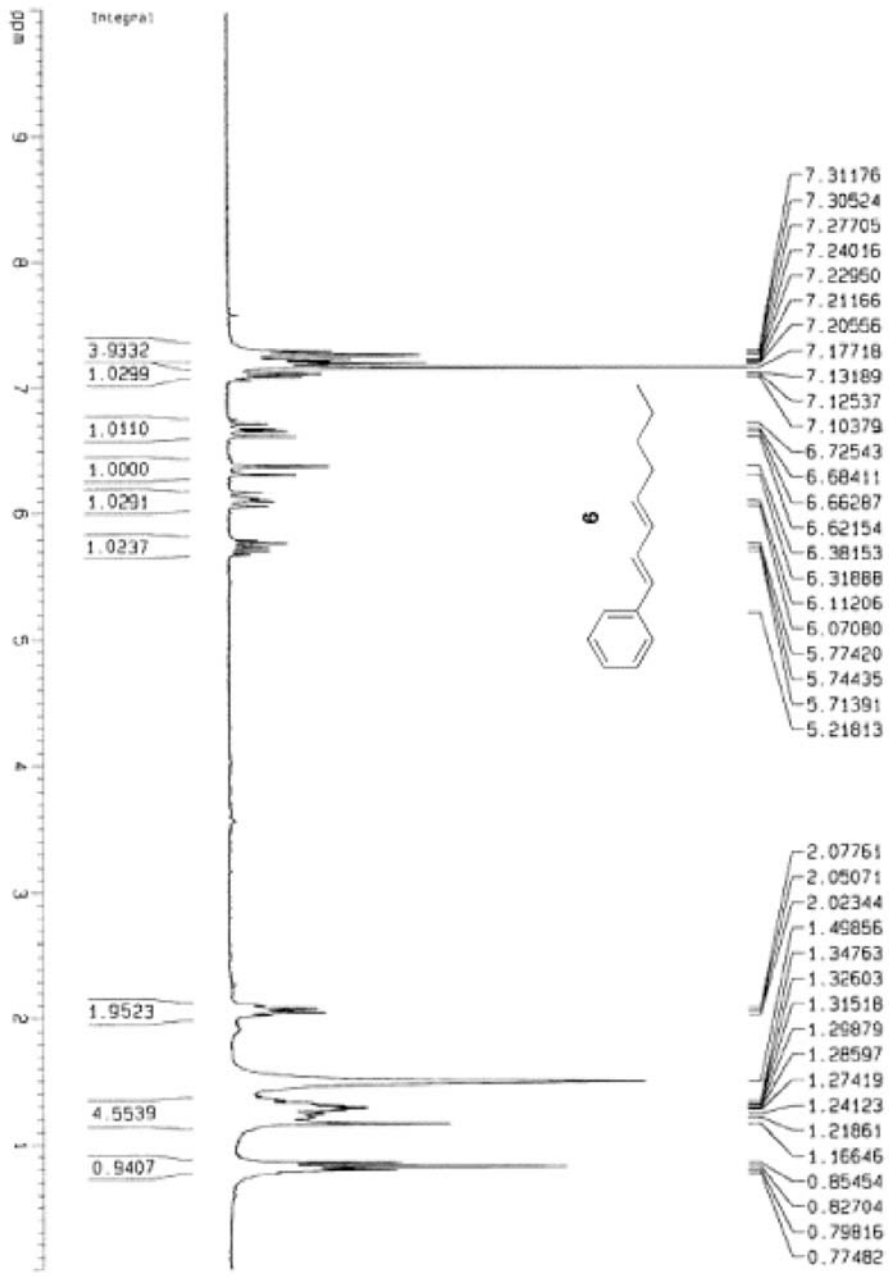

Current Data Parameters

|        |        |
|--------|--------|
| NAME   | Proton |
| EXPNO  | 1      |
| PROCNO | 1      |

F2 - Acquisition Parameters

|         |                |
|---------|----------------|
| Date_   | 20040212       |
| Time    | 12.11          |
| INSTRUM | spect          |
| PROBHD  | 5 mm BBI X Y   |
| PULPROG | zg30           |
| TD      | 32768          |
| SOLVENT | CDCl3          |
| NS      | 150            |
| DS      | 4              |
| SWH     | 6326.554 Hz    |
| FIDRES  | 0.191213 Hz    |
| AQ      | 2.6149354 sec  |
| RG      | 1824.6         |
| DM      | 79.800 usec    |
| DE      | 6.00 usec      |
| TE      | 300.0 K        |
| D1      | 1.00000000 sec |

\*\*\*\*\* CHANNEL f1 \*\*\*\*\*

|      |                 |
|------|-----------------|
| NUC1 | 1H              |
| P1   | 6.50 usec       |
| PL1  | 3.00 dB         |
| PR01 | 250.1303371 MHz |

F2 - Processing parameters

|     |                 |
|-----|-----------------|
| SI  | 16384           |
| GF  | 250.1303370 MHz |
| KOM | EM              |
| SSB | 0               |
| LB  | 0.30 Hz         |
| GB  | 0               |
| PC  | 1.00            |

10 MHz 0.100 dppm/pts

|       |                 |
|-------|-----------------|
| CK    | 20.00 cm        |
| F1P   | 10.000 ppm      |
| F1    | 250.1303371 MHz |
| F2P   | 0.000 ppm       |
| F2    | 0.000 Hz        |
| PRMCM | 0.50000 ppm/cm  |
| MZCM  | 125.00502 Hz/cm |

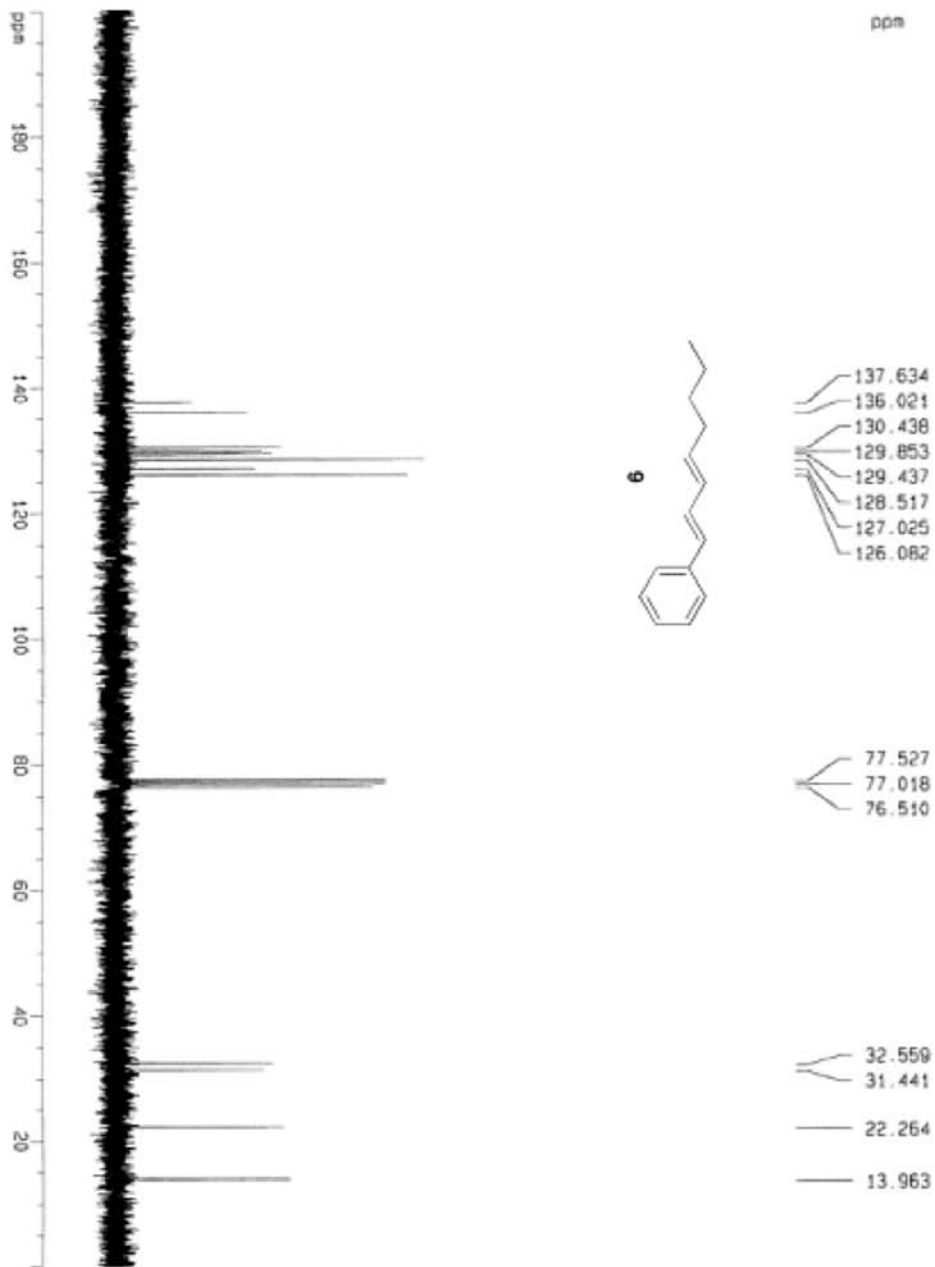

```

Current Data Parameters
NAME          carbon
EXPNO        1
PROCNO       1

F2 - Acquisition Parameters
Date_         20040309
Time         20.26
INSTRUM      spect
PROBHD       5 mm BBI X Y
PULPROG      zgpg30
TD            32768
SOLVENT      CDCl3
NS            184
DS            4
SWH           12027.514 Hz
FIDRES       0.463572 Hz
AQ            1.236584 sec
RG            13804
DM            37.800 us/c
DE            6.00 us/c
TE            300.0 K
D1            2.0000000 sec
D11           0.0100000 sec
D12           0.2000000 sec

***** CHANNEL f1 *****
NUC1          13C
P1            12.90 usec
PL1           0.00 dB
SFO1          62.9015036 MHz

***** CHANNEL f2 *****
CPDPRG2      waltz16
NUC2          1H
P2            130.00 usec
PL2           3.00 dB
PL12          30.00 dB
PL13          32.00 dB
SFO2          250.1310000 MHz

F2 - Processing parameters
SI            32768
SF            62.8992570 MHz
MCH           EM
SSB           0
LB            1.00 Hz
GB            0
PC            1.00

10 NMR 0.100 parameters
CX            26.00 cm
F1P           200.000 69H
F1            12579.05 Hz
F2P           0.000 50H
F2            0.00 Hz
PPHVCM       10.00000 69H/cm
HZCM         629.95251 Hz/cm
  
```

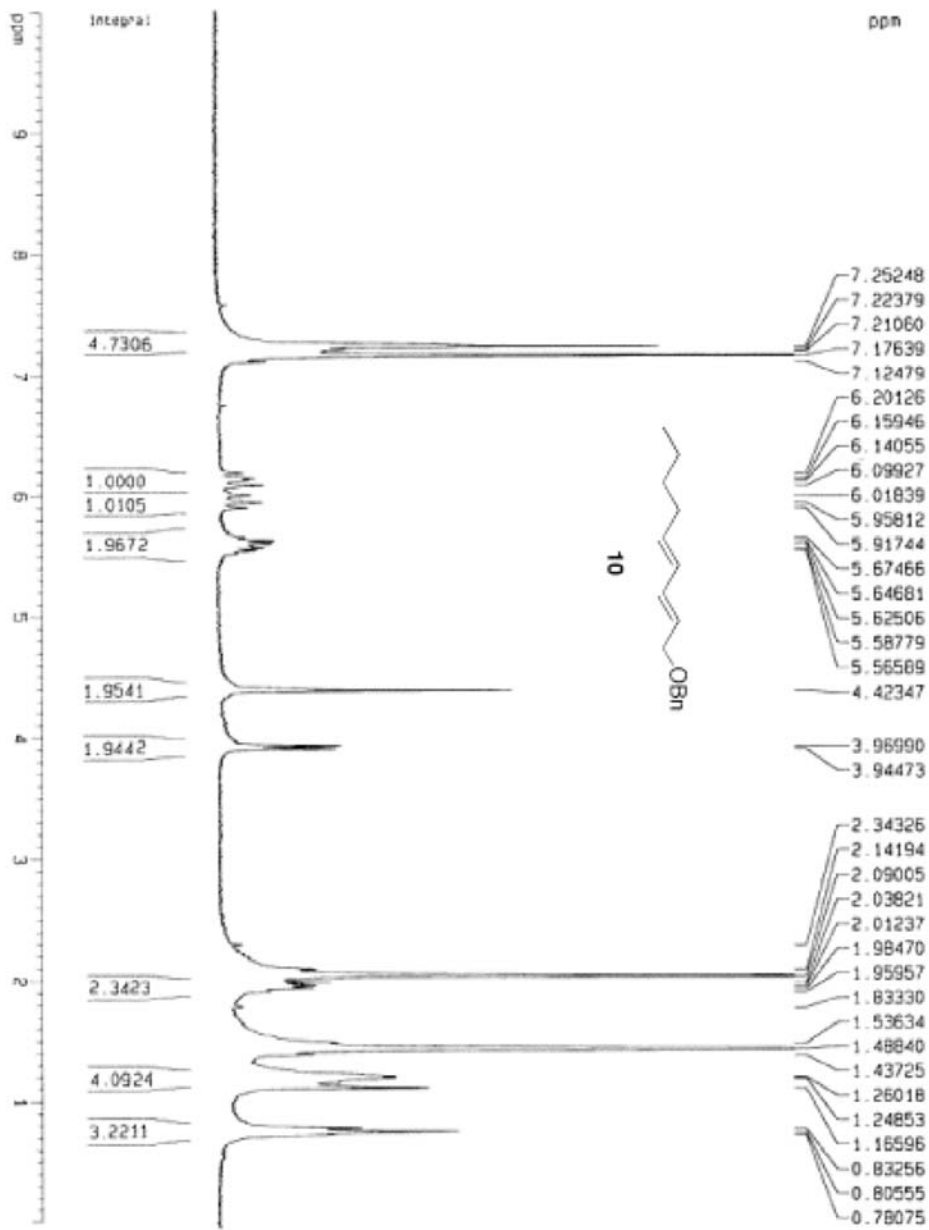

Current Data Parameters  
 NAME: proton  
 EXPNO: 1  
 PROCNO: 1

F2 - Acquisition Parameters  
 Date\_: 20060213  
 Time: 14:53  
 INSTRUM: spect  
 PPGPGR4: 5 mm BBI X Y  
 PULPROG: zgpg30  
 TO: 32768  
 SOLVENT: CDCl3  
 NS: 173  
 DS: 4  
 SWH: 6385.664 Hz  
 FIDRES: 0.191213 Hz  
 AQ: 2.6149364 sec  
 RG: 1625.5  
 CW: 79.800 usec  
 DE: 6.00 usec  
 TE: 300.0 K  
 O1: 1.00000000 sec

\*\*\*\*\* CHANNEL f5 \*\*\*\*\*  
 NUC1: 1H  
 P1: 6.50 usec  
 PL1: 3.00 dB  
 SFO1: 250.1302091 MHz

F2 - Processing parameters  
 SI: 16384  
 SF: 250.1302090 MHz  
 KHZ: 0  
 SSB: 0  
 LB: 0.30 Hz  
 GB: 0  
 PC: 1.00

1D NMR plot parameters  
 CX: 20.00 cm  
 F1P: 10.000 ppm  
 F1: 2501.30 Hz  
 F2P: 0.000 ppm  
 F2: 0.00 Hz  
 FPMCK: 0.50000 ppm/cm  
 MZCM: 125.06902 Hz/cm

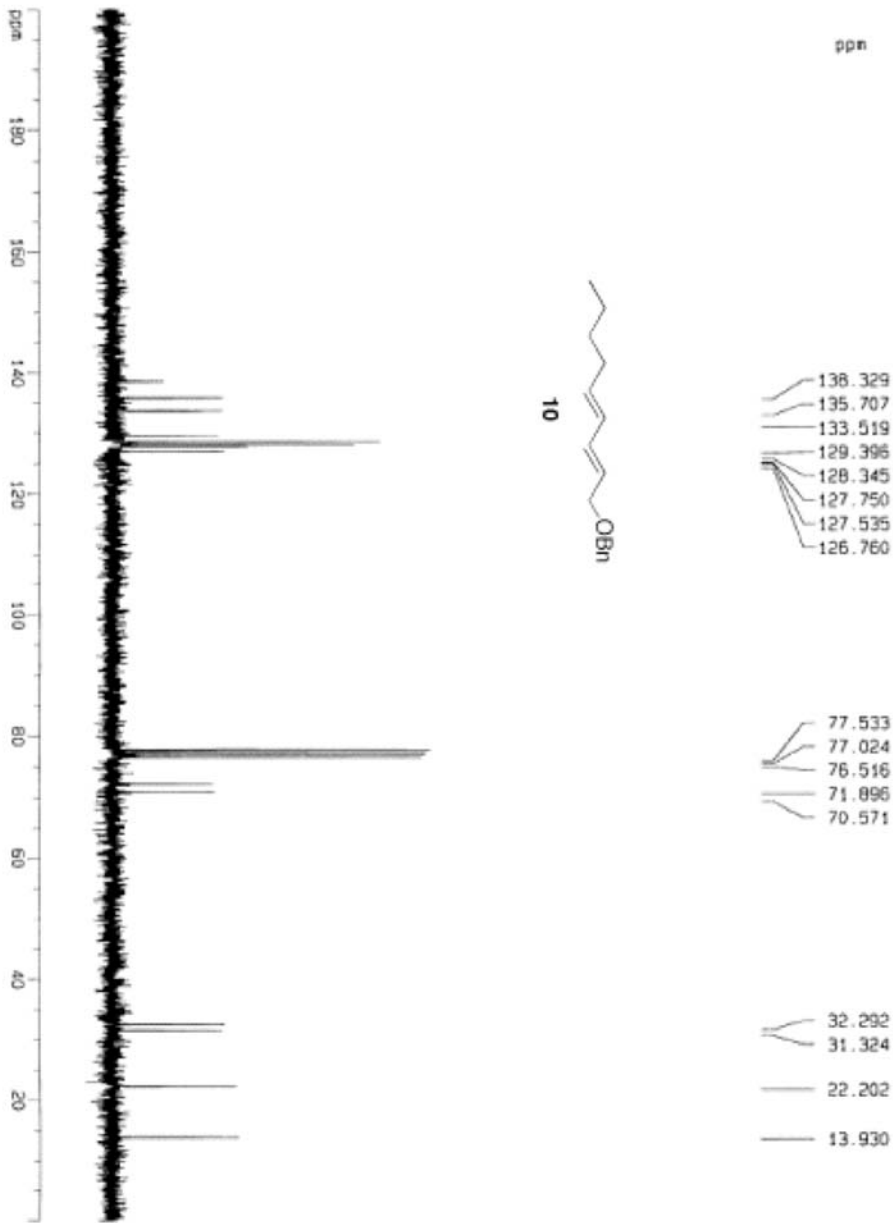

Current Data Parameters  
 NAME: CARBON  
 EXPNO: 1  
 PROCNO: 1

F2 - Acquisition Parameters

Date\_: 20040318  
 Time: 18.55  
 INSTRUM: spect  
 PROBHD: 5 mm BBI X 1  
 PULPROG: zgpg30  
 TO: 32768  
 SOLVENT: CDCl3  
 NS: 204  
 DS: 4  
 SWH: 13277.514 Hz  
 FIDRES: 0.401872 Hz  
 AQ: 1.238804 sec  
 RG: 12804  
 DM: 37.800 usec  
 DE: 6.00 usec  
 TE: 300.0 K  
 O1: 3.00000000 MHz  
 O2: 0.03000000 MHz  
 O3: 0.00000000 MHz  
 D12: 0.00000000 MHz

\*\*\*\*\* CHANNEL f1 \*\*\*\*\*

NUC1: 13C  
 P1: 12.50 usec  
 PL1: 0.00 dB  
 GPO1: 62.00150000 MHz

\*\*\*\*\* CHANNEL f2 \*\*\*\*\*

NAME: 1H  
 NUC2: 1H  
 P2: 120.00 usec  
 PL2: 1.00 dB  
 GPO2: 30.000000 MHz  
 R1: 32.00 dB  
 R2: 32.00 dB  
 SFO2: 250.1310000 MHz

F2 - Processing parameters

SI: 32768  
 SF: 82.500000 MHz  
 KW: EM  
 SSB: 0  
 LB: 1.00 Hz  
 GB: 0  
 PC: 1.40  
 10 NMR PLOT PARAMETERS  
 CX: 20.00 cm  
 FIP: 200.000 GHz  
 F1: 125.76 MHz  
 F2P: 0.000 GHz  
 F2: 0.00 MHz  
 PPMCM: 10.00000 GHz/cm  
 HZCM: 628.95204 MHz/cm

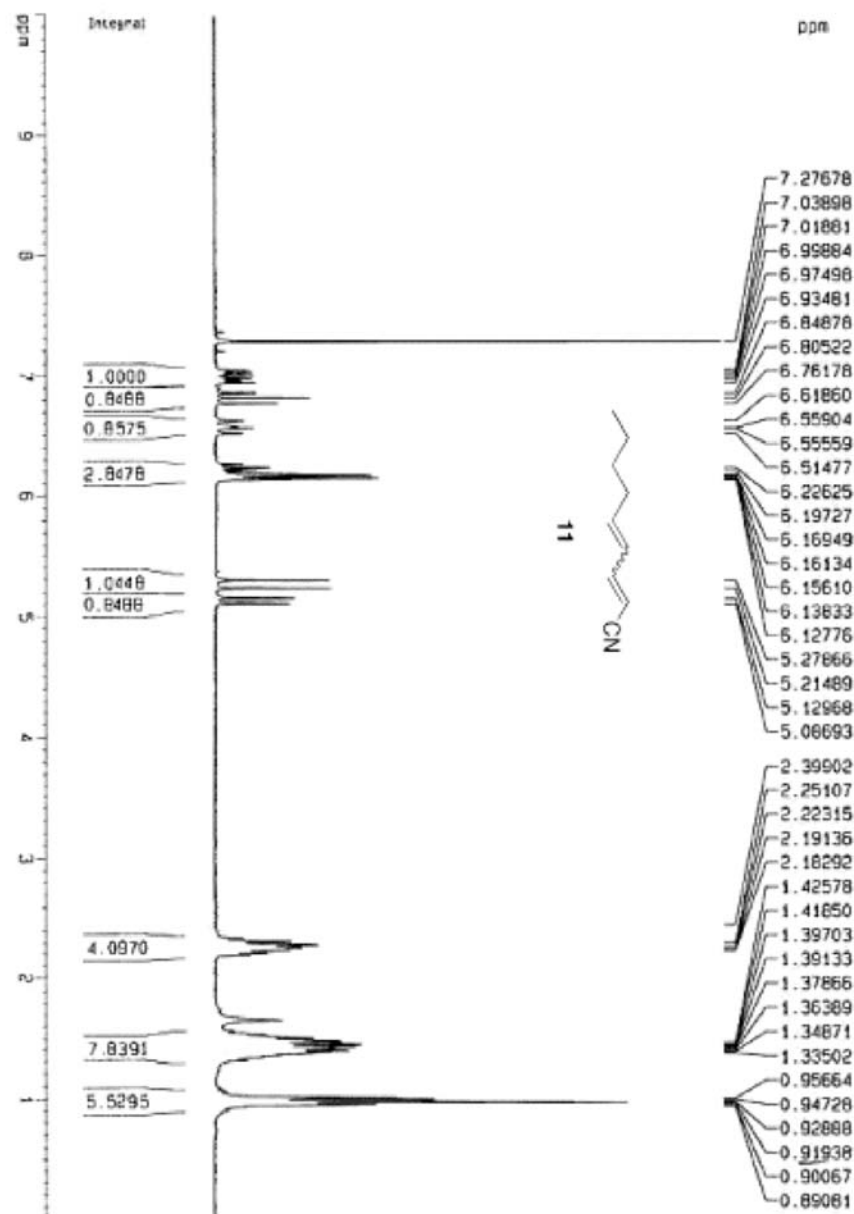

```

Current Data Parameters
NAME          proton
EXPNO        1
PROCNO       1

F2 - Acquisition Parameters
Date_        20040317
Time         20.41
INSTRUM      spect
PROBHD       5 mm QNP 1 X Y
PULPROG      zgpg30
TD           32768
SOLVENT      CDCl3
NS           8
DS           4
SH1          4076.410 Hz
FIDRES       0.122268 Hz
AQ           4.01094950 sec
RG           812.7
DM           124.890 usec
DE           6.00 usec
TE           300.0 K
TE           1.000000000 sec

***** CHANNEL f1 *****
NUC1         1H
P1           5.50 usec
PL1         -3.00 dB
SFO1        250.1302371 MHz

F2 - Processing parameters
SI           16384
SF           250.130230 MHz
WDW          EM
SSB          0
LB           0.30 Hz
GB           0
PC           1.00

1D NMR plot parameters
CX           20.00 cm
FIP          10.000 ppm
F1           2501.30 MHz
F2P          0.000 ppm
F2           0.00 Hz
PUNCH        0.50000 mm/cyc
MDCM        125.00592 Hz/cm
  
```

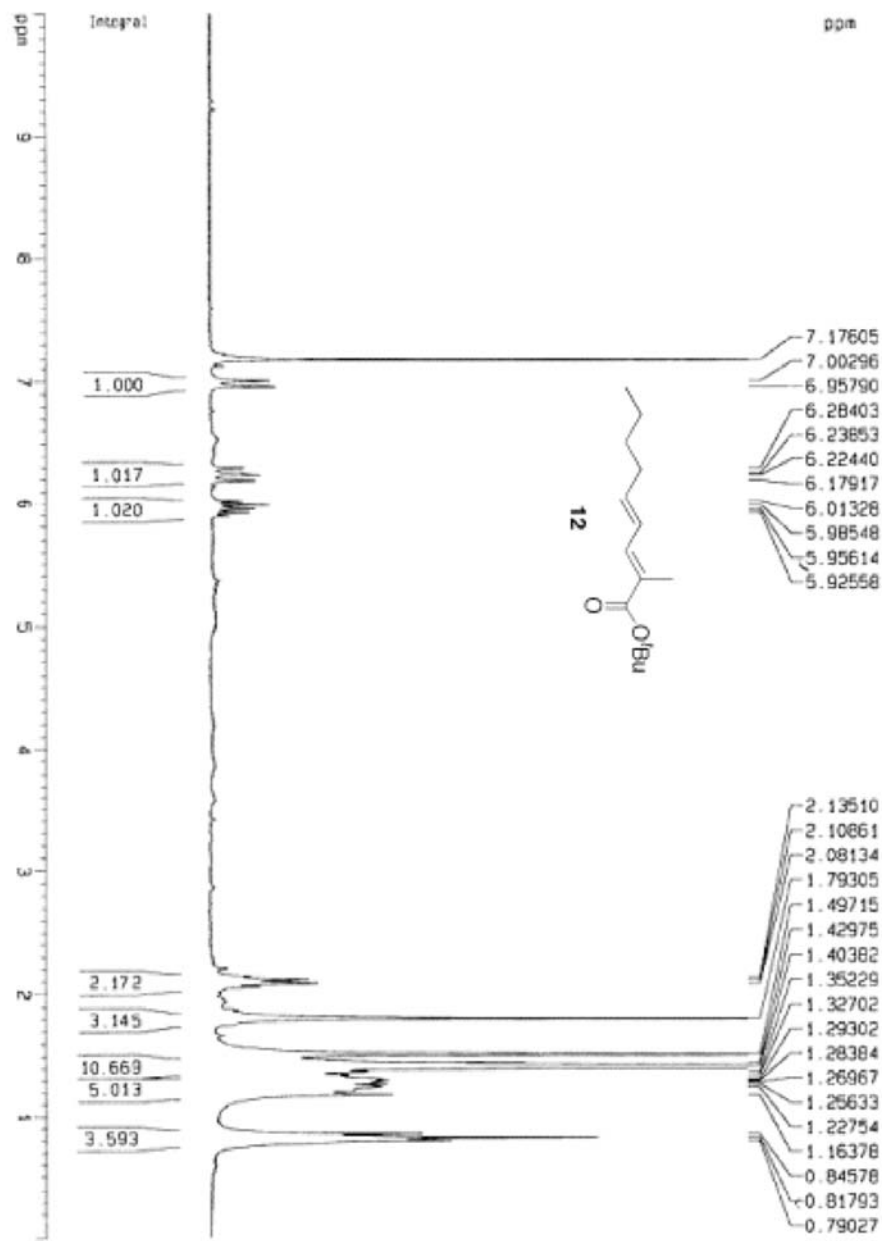

```

Current Data Parameters
NAME          proton
EXPNO        1
PROCNO       1

F2 - Acquisition Parameters
Date_        20040227
Time         14.31
INSTRUM     spect
PROBHD      5 mm BBI X Y
PULPROG     zg30
TD          32768
SOLVENT     CDCl3
NS          55
DS          4
SWH         6265.864 Hz
FIDRES     0.191213 Hz
AQ         2.6140364 sec
RG         1024
DM         79.800 usec
DE         6.00 usec
TE         300.0 K
D1         1.00000000 sec

***** CHANNEL f1 *****
NUC1        1H
P1          6.50 usec
PL1         3.00 dB
SFO1        250.1303371 MHz

F2 - Processing parameters
SI          16384
SF         250.1303371 MHz
KOH         EM
SFO         0
LB          0
GB          0
PC          1.00

1D NMR D1/D2 parameters
CX          20.00 cm
F1P        10.000 GHz
F1         250.130 MHz
F2P        0.000 GHz
F2         0.00 MHz
P1PCMH    0.50000 GHz/cm
H2OUM     125.06502 Hz/cm
  
```

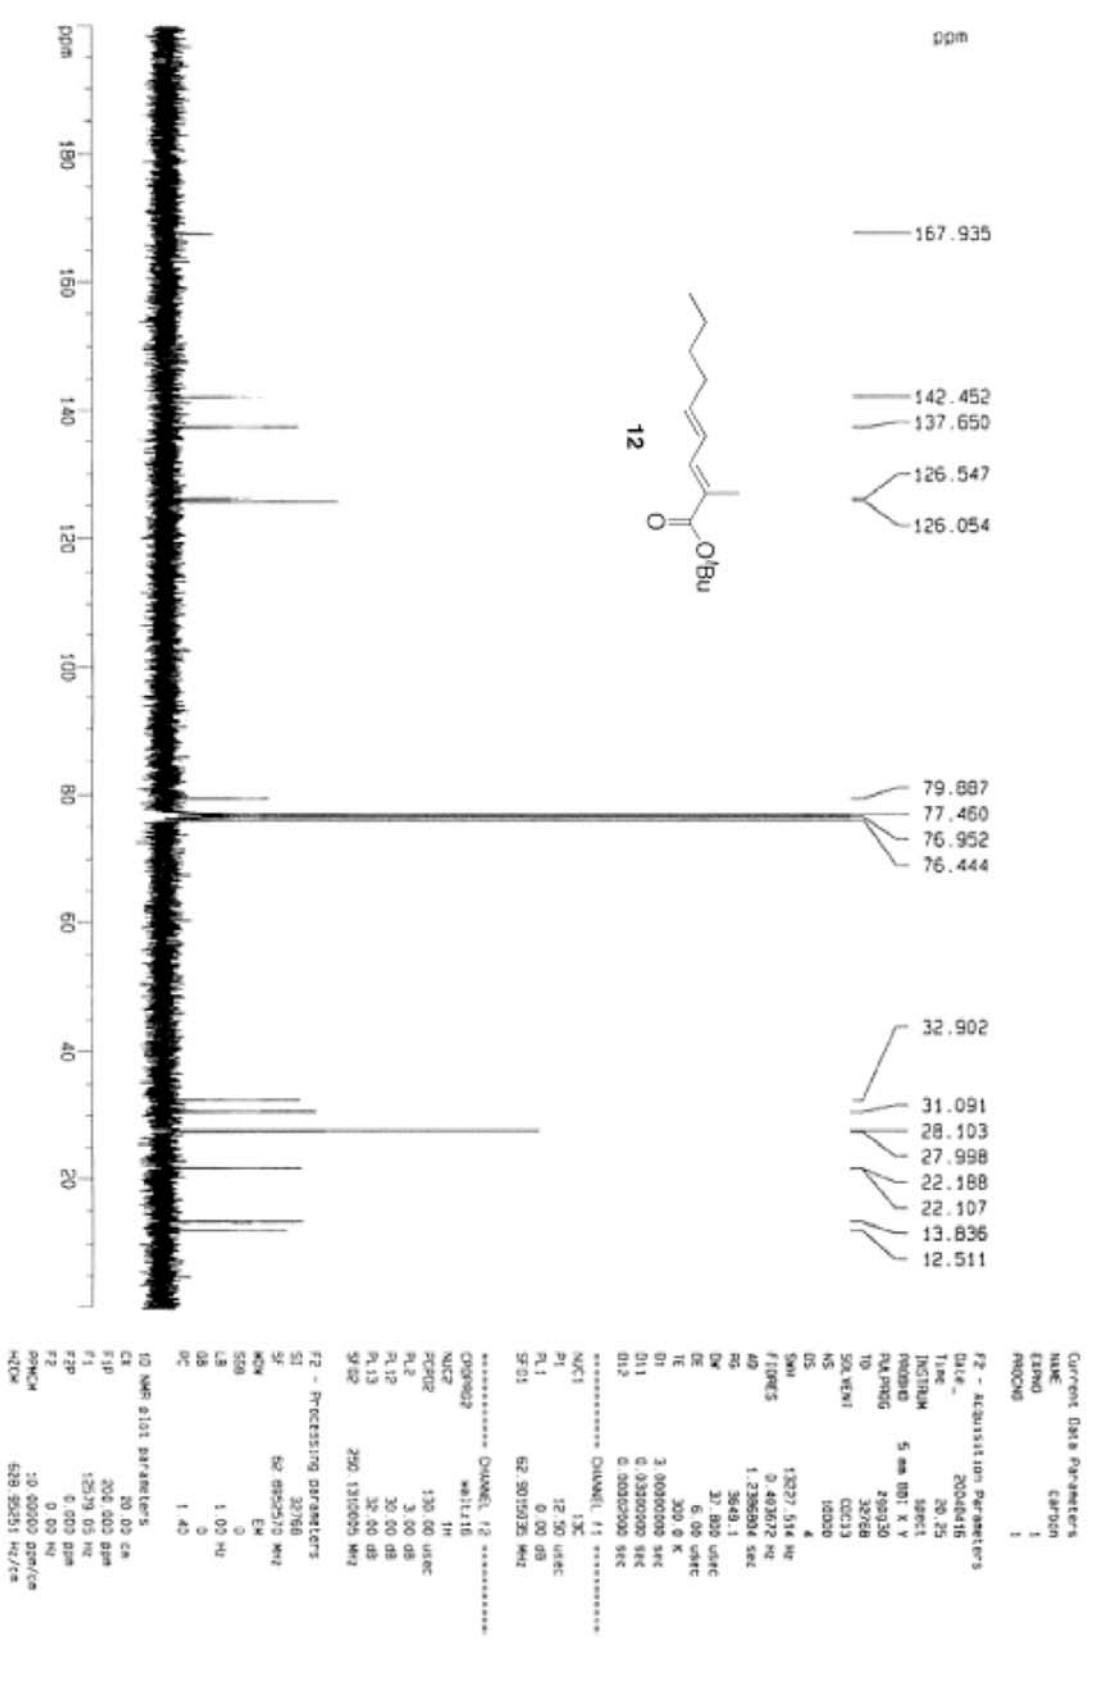

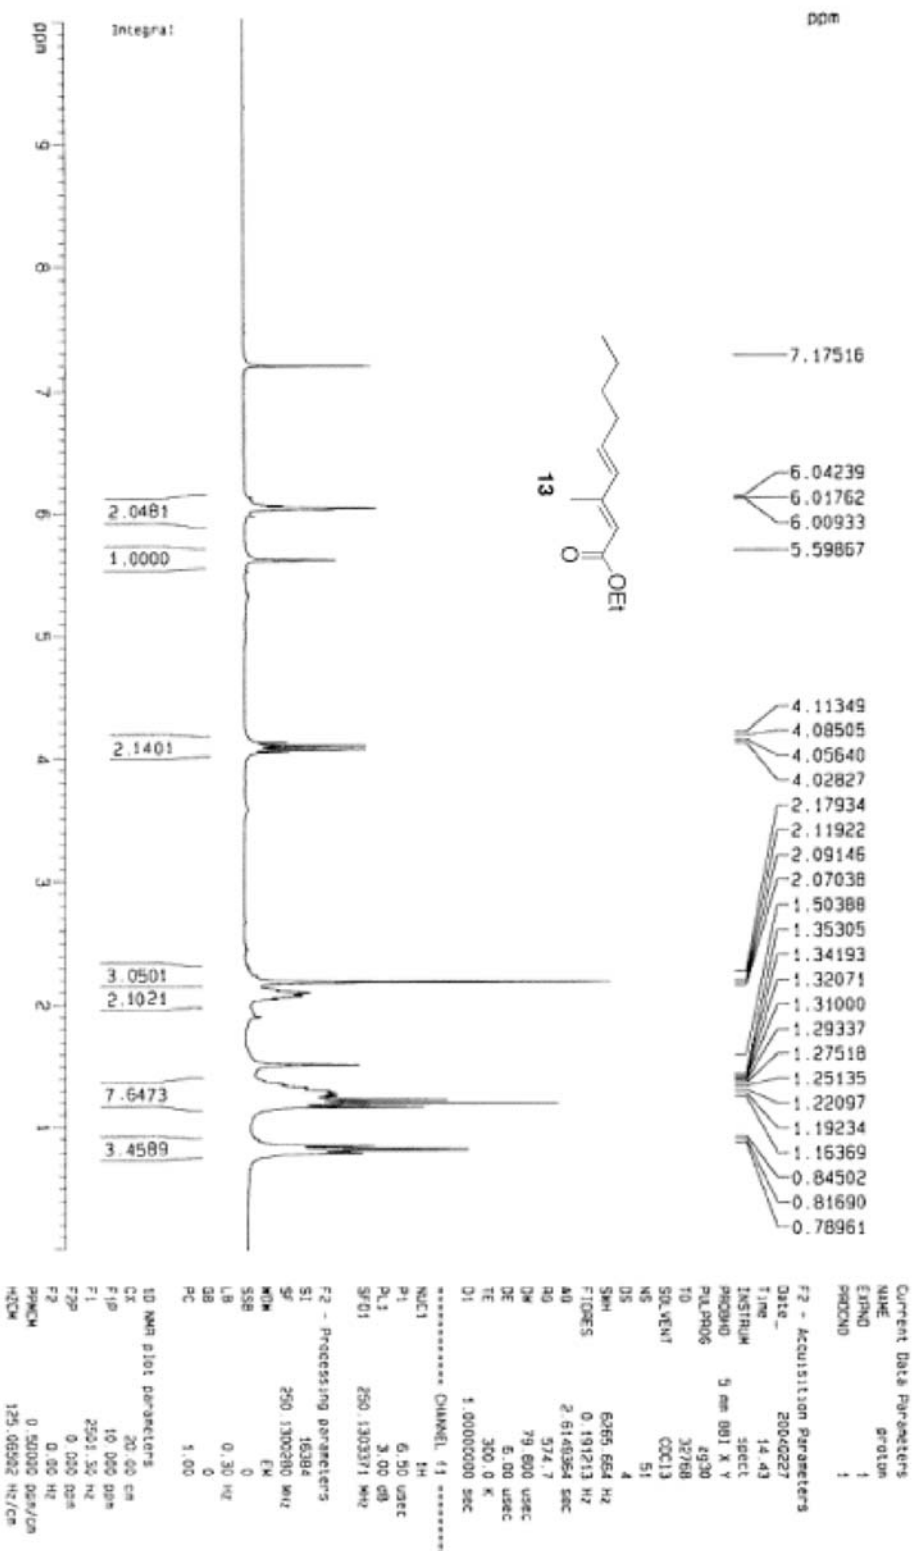



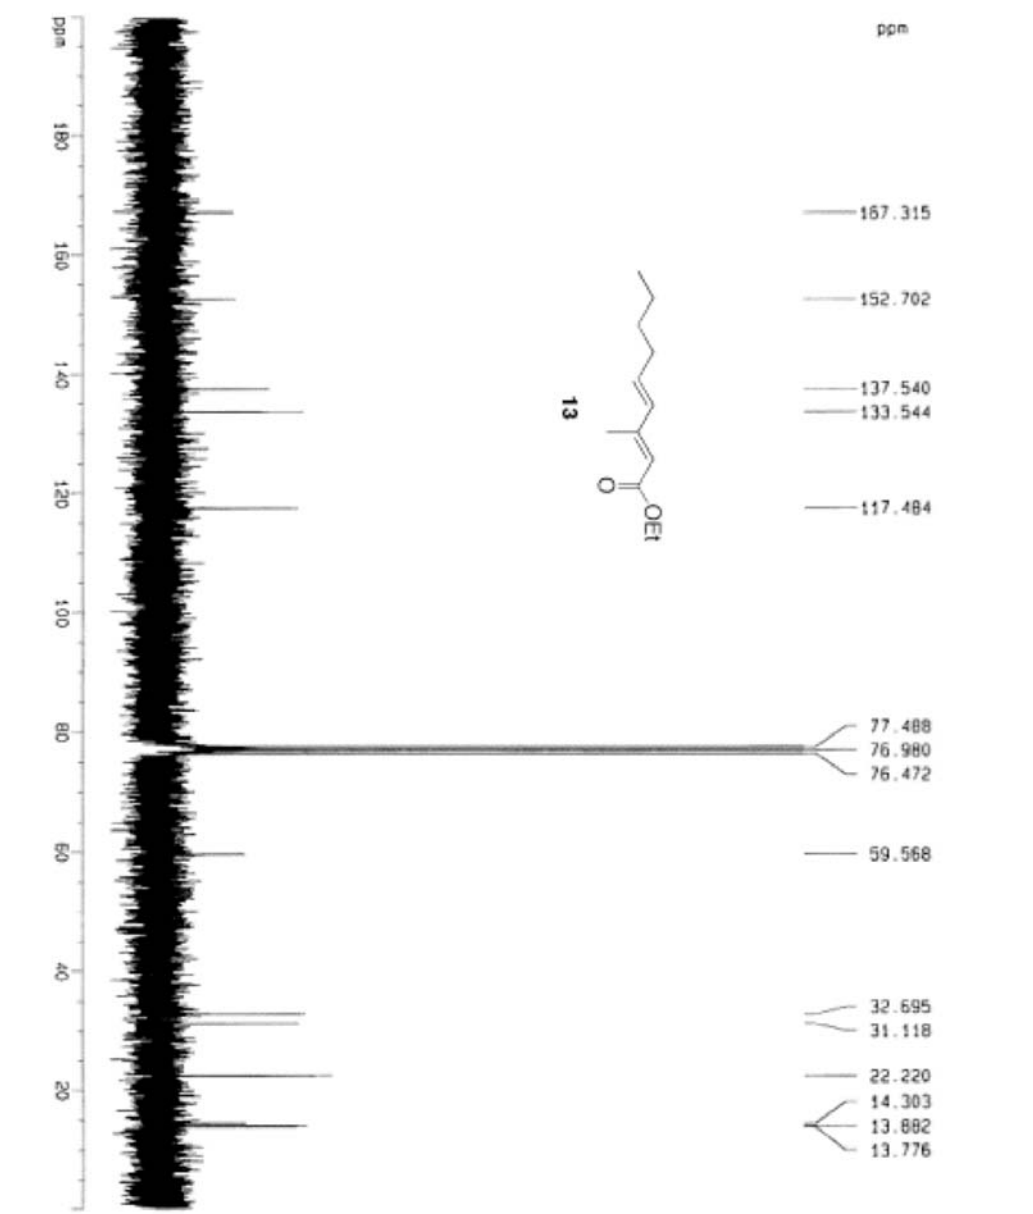

Current Data Parameters

|        |        |
|--------|--------|
| NAME   | carbon |
| EXPNO  | 1      |
| PROCNO | 1      |

F2 - Acquisition Parameters

|         |                |
|---------|----------------|
| DATE_   | 20040301       |
| TIME    | 19:03          |
| INSTRUM | topci          |
| PROBHD  | 5 mm BBI X 1   |
| PULPROG | zgpg30         |
| TD      | 32768          |
| SOLVENT | CDCl3          |
| NS      | 1789           |
| DS      | 4              |
| SWH     | 13297.514 Hz   |
| FIDRES  | 0.453872 Hz    |
| AQ      | 1.2388804 sec  |
| RG      | 512* 6         |
| DM      | 37.869 usec    |
| DE      | 6.00 usec      |
| TE      | 300.0 K        |
| D1      | 3.00000000 sec |
| D11     | 0.03000000 sec |
| D12     | 0.00000000 sec |

Channel F1

|      |               |
|------|---------------|
| NUC1 | 13C           |
| PC1  | 32.50 usec    |
| PL1  | 0.00 dB       |
| PR1  | 62.9015070 Hz |

Channel F2

|       |                 |
|-------|-----------------|
| NAME  | waltz16         |
| NUC2  | 1H              |
| PCPD2 | 130.00 usec     |
| PL2   | 3.00 dB         |
| PR2   | 32.00 MHz       |
| PR3   | 32.00 MHz       |
| PR4   | 250.1310000 MHz |

F2 - Processing parameters

|     |               |
|-----|---------------|
| SF  | 32768         |
| SR  | 67.982510 MHz |
| KCM | EM            |
| SSB | 0             |
| LB  | 1.00 Hz       |
| GB  | 0             |
| PC  | 1.00          |

10 NMR plot parameters

|       |                           |
|-------|---------------------------|
| CE    | 20.00 cm                  |
| F1P   | 200.000000 MHz            |
| F1    | 12579.65 MHz              |
| F2P   | 5.000000 MHz              |
| F2    | 0.100 MHz                 |
| PRMCK | 10.000000000000000 MHz/cm |
| HTCK  | 529.58251 MHz/cm          |

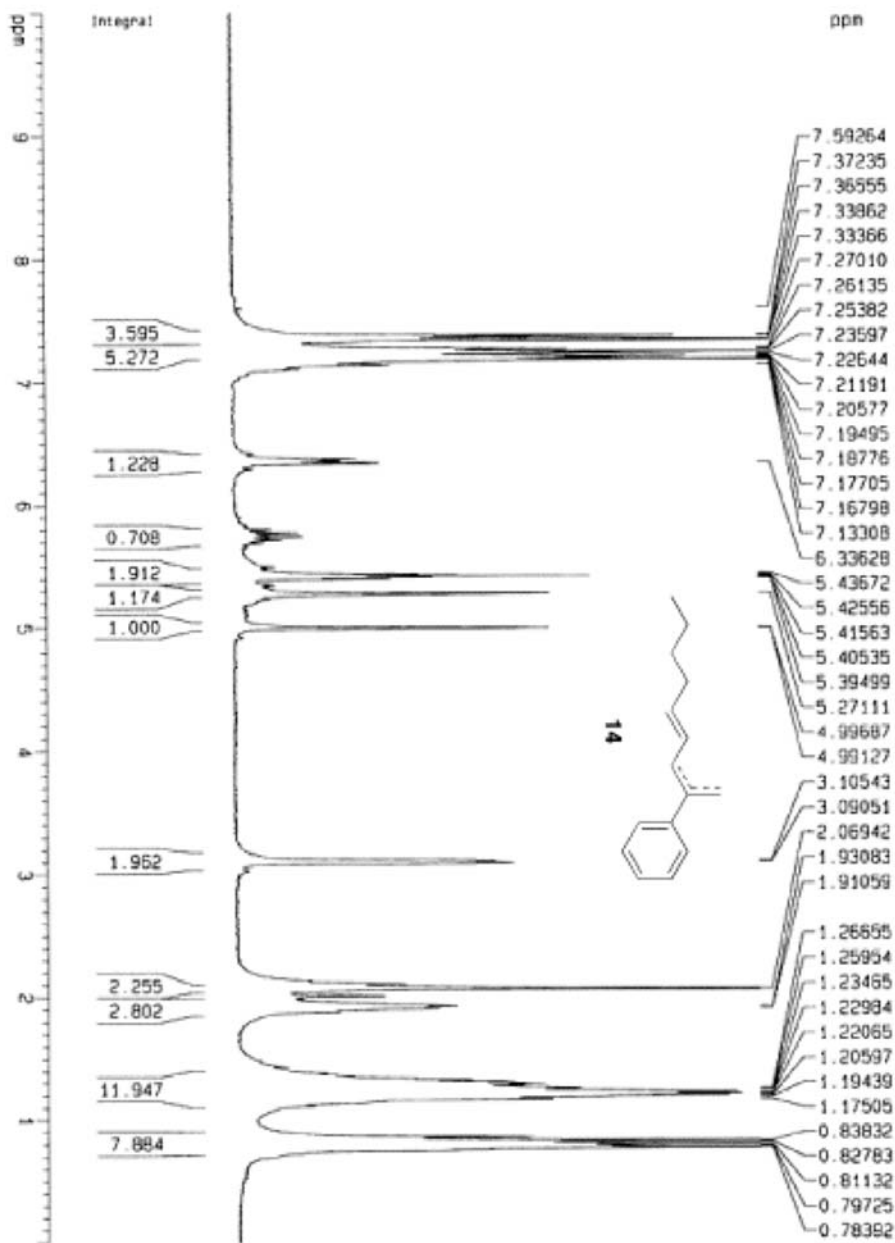

Current Data Parameters  
NAME proton  
EXPNO 1  
PROCNO 1

F2 - Acquisition Parameters  
Date\_ 20040221  
Time 9.52  
INSTRUM spect  
PROBHD 5 mm BBI X Y  
PULPROG zg30  
TD 32768  
SOLVENT CDCl3  
NS 83  
DS 4  
SWH 6265.664 Hz  
FIDRES 0.191213 Hz  
AQ 2.0149364 sec  
RG 724.1  
DM 79.800 us/c  
DE 6.00 usec  
TE 300.0 K  
D1 1.00000000 sec

\*\*\*\*\* CHANNEL f1 \*\*\*\*\*  
NUC1 1H  
P1 6.50 usec  
PL1 3.00 dB  
SFO1 250.1303371 MHz

F2 - Processing parameters  
SI 16384  
SF 250.1300290 MHz  
KCM EM  
SSB 0  
LB 0.30 Hz  
GB 0  
PC 1.00

1D NMR plot parameters  
CX 20.00 cm  
FSF 10.000 gpm  
F1 2501.30 Hz  
F2P 0.000 gpm  
F2 0.00 Hz  
APCKM 0.50000 dm/cm  
HZCM 125.06502 Hz/cm

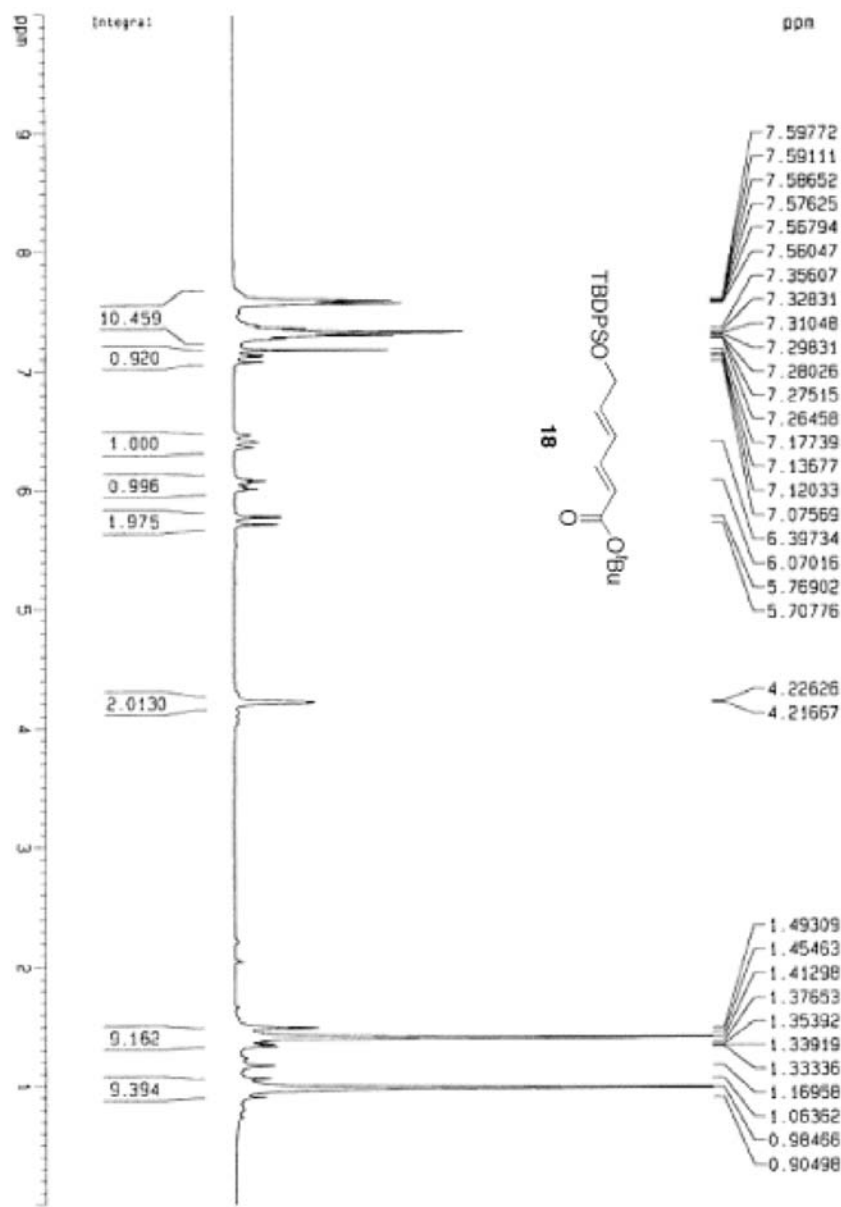

Current Data Parameters  
 NAME proton  
 EXPNO 1  
 PROCNO 1

F2 - Acquisition Parameters  
 Date\_ 20040318  
 Time 21.06  
 INSTRUM spect  
 PROSD 5 mm BBI X 1  
 PULPROG zg30  
 TO 32768  
 SOLVENT CDCl3  
 NS 16  
 DS 4  
 SWH 6055.664 Hz  
 FIDRES 0.191213 Hz  
 AQ 2.6149364 sec  
 RG 512  
 DM 79.800 usec  
 DE 6.00 usec  
 TE 300.0 K  
 D1 1.00000000 sec

\*\*\*\*\* CHANNEL f1 \*\*\*\*\*  
 NUC1 1H  
 P1 6.50 usec  
 PL1 3.00 dB  
 SFO1 250.1303371 MHz

F2 - Processing parameters  
 SI 16394  
 SF 250.1303370 MHz  
 KW EM  
 SSB 0  
 LB 0.30 Hz  
 GB 0  
 PC 1.00

10 MHz 0.101 parameters  
 CX 20.00 cm  
 FIP 10.000 ppm  
 F1 250.130 Hz  
 F2 0.050 ppm  
 F2 0.50 Hz  
 PPGM 0.50000 ppm/cm  
 HZCM 125.05502 Hz/cm

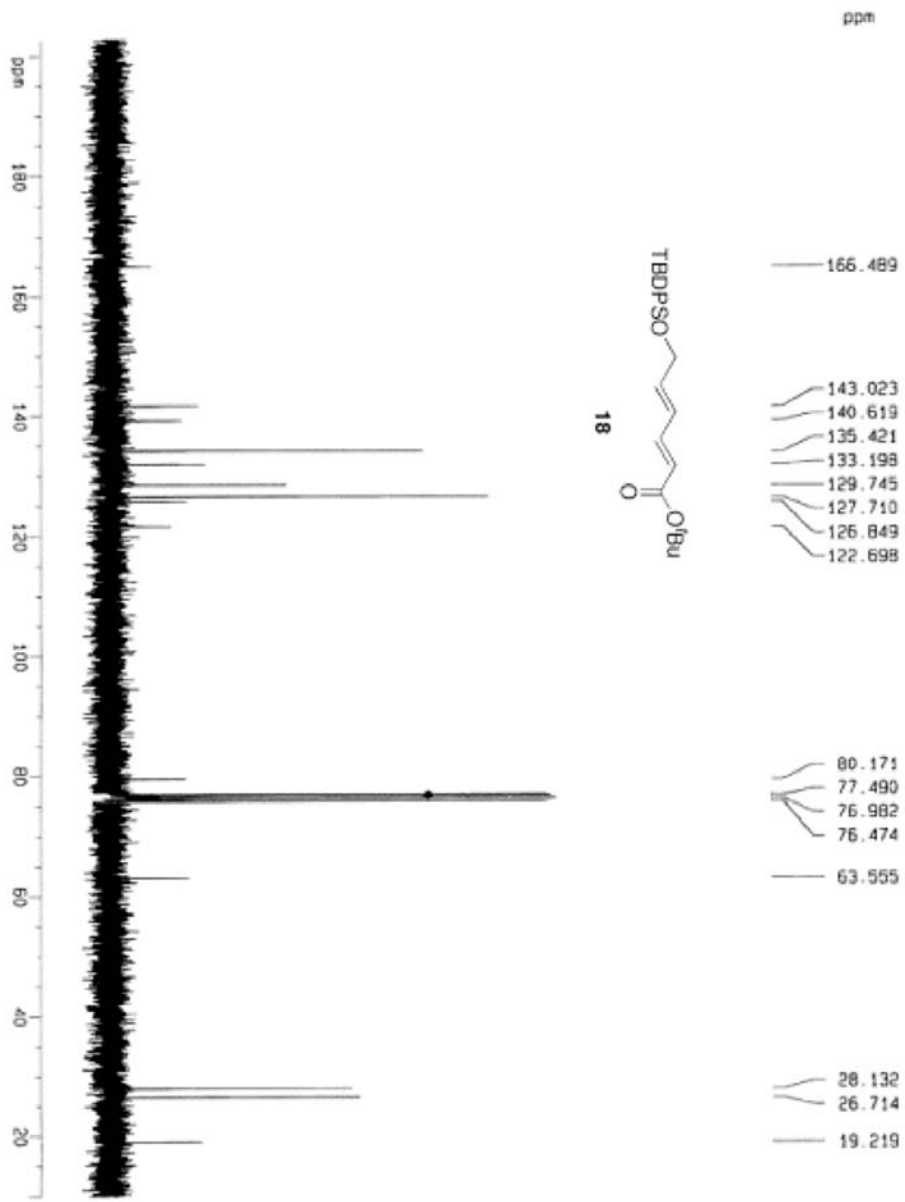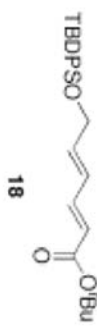

```

Current Data Parameters
NAME          Carbon
EXPNO        1
PROCNO       1
----- Acquisition Parameters
Date_         20030401
Time          10.29
INSTRUM      spect
PROBHD       5 mm BBI X Y
PULPROG      zgpg30
TD            32768
SOLVENT      CDCl3
NS            153
DS            4
SWH           5327.514 Hz
FIDRES       0.403672 Hz
AQ           1.2386004 sec
RG            5792 G
DW            37.800 usec
DE            8.00 usec
TE            300.0 K
D1            3.0000000 sec
D11           0.5000000 sec
D12           0.0000000 sec
----- CHANNEL f1 -----
NUC1          13C
P1            12.50 usec
PL1           0.00 dB
SFO1         62.9015025 MHz
----- CHANNEL f2 -----
CPDPRG2      waltz16
NUC2          1H
PCPD2        130.00 usec
PL2           3.00 dB
PL12         30.00 dB
PL13         32.00 dB
SFO2         250.1310005 MHz
----- Processing parameters
SI            32768
SF            62.9015020 MHz
WDW           EM
SSB           0
GB            0
CB            1.00 Hz
B0            0
PC            1.40
----- 1D sub plot parameters
CX            20.00 cm
F1P           200.000 500
F1            12579.05 Hz
F2P           0.000 000
F2            0.00 Hz
PRN1CH       528.55205 Hz/cm
PRN2CH       528.55205 Hz/cm
  
```

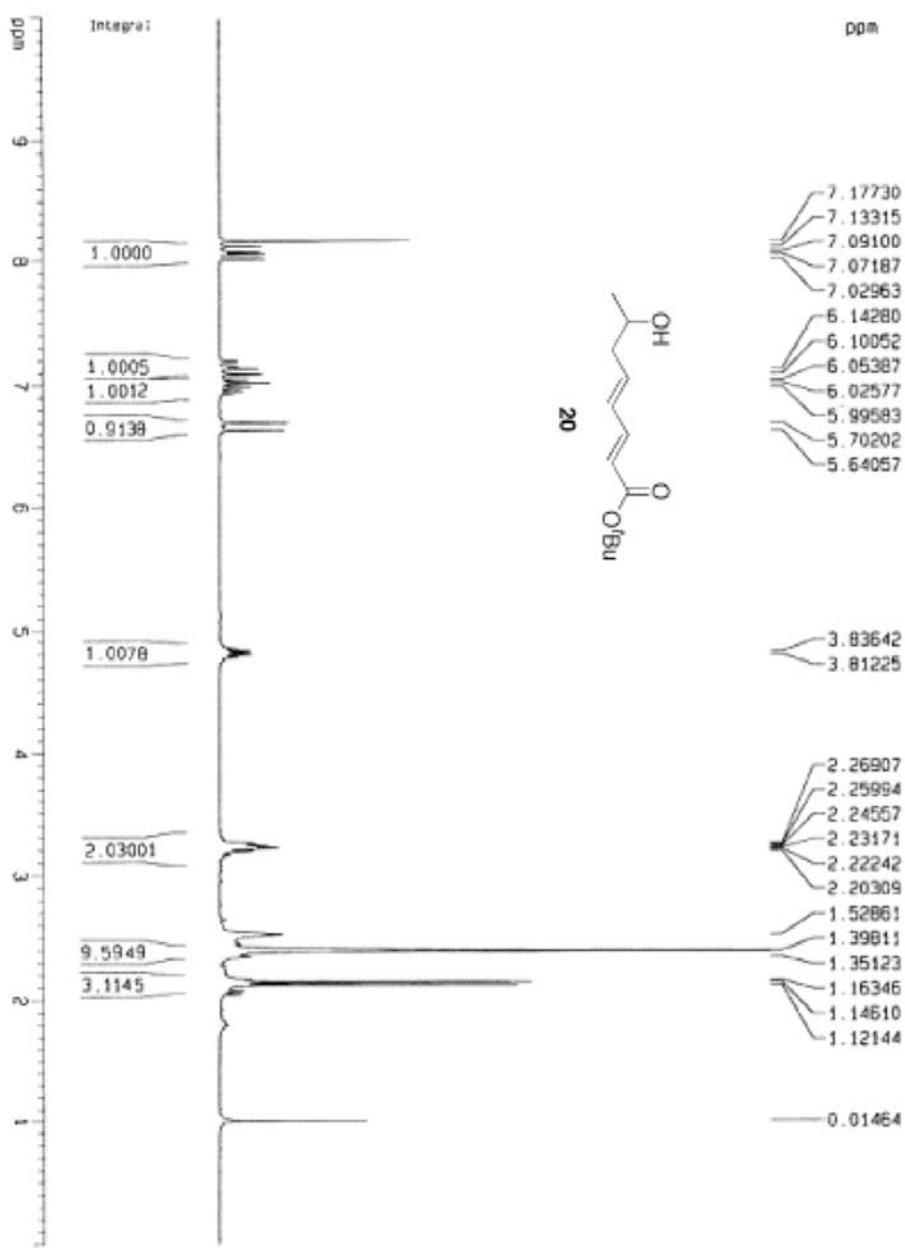

```

Current Data Parameters
NAME          proton
EXPNO        1
PROCNO       1

F2 - Acquisition Parameters
Date_        20140305
Time         10.18
INSTRUM     spect
PROBHD      5 mm QNP 1
PULPROG     zgpg30
TD           32768
SOLVENT     CDCl3
NS           8
DS           4
SWH          6465.664 Hz
FIDRES      0.191213 Hz
AQ           2.6149264 sec
RG           645.1
DM           79.800 usec
DE           6.00 usec
TE           300.0 K
D1           1.00000000 sec

----- CHANNEL f1 -----
NUC1         1H
P1           6.50 usec
PL1          3.00 dB
SFO1         200.1302371 MHz

F2 - Processing parameters
SI           16384
SF           200.1302370 MHz
WDW          EM
SSB           0
LB           0.30 Hz
GB           0
PC           1.00

3D peak plot parameters
CX           20.00 cm
CZ           10.000 cm
F1           2501.30 Hz
F2           0.020 cm
PCMKCM      0.50000 cm/cm
HZCM        125.06592 Hz/cm
  
```

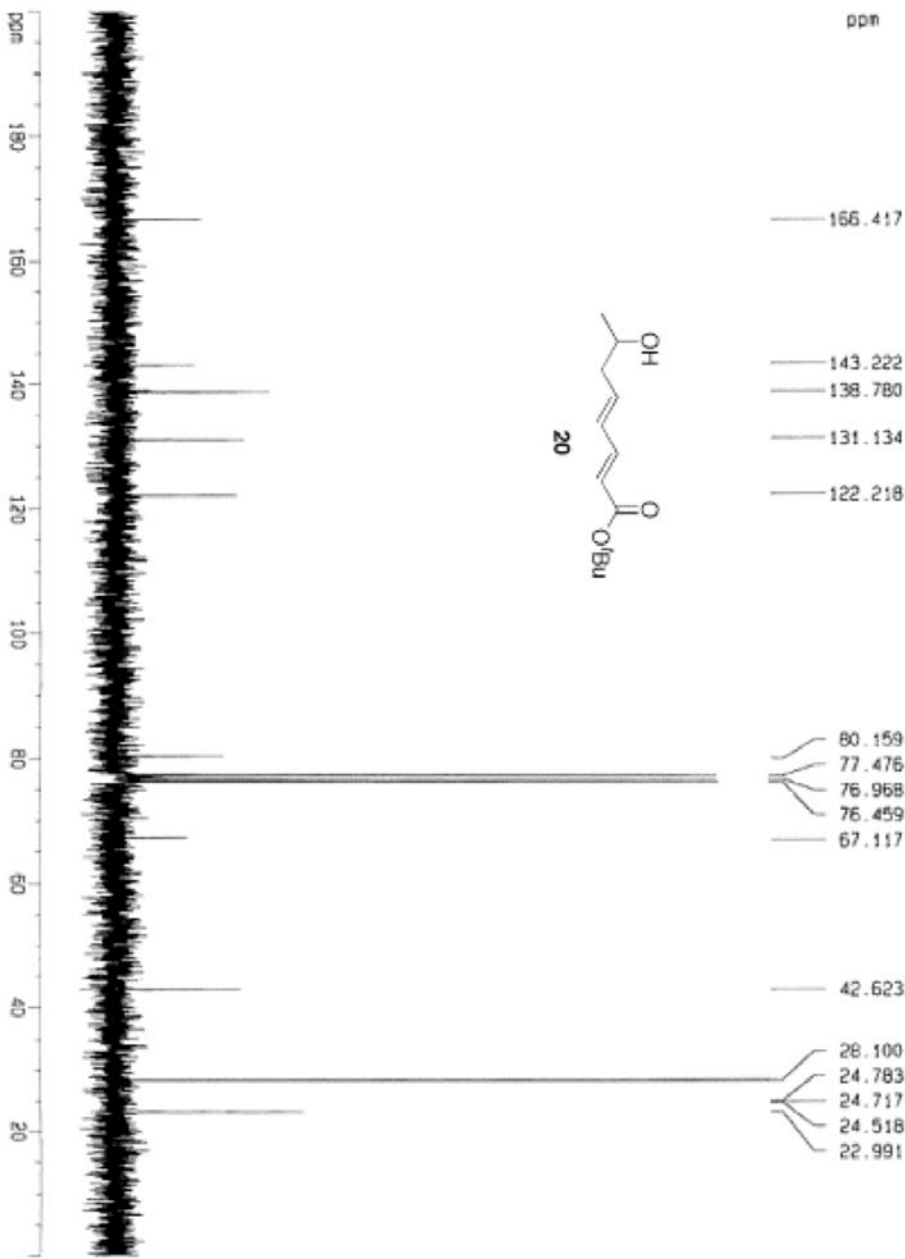

```

NAME          carbon
EXPNO         1
PROCNO       1
-----
F2 - Acquisition Parameters
Date_         20060419
Time         10.29
INSTRUM      spect
PROBHD       5 mm BBI X Y
PULPROG      zgpg30
TD           32768
SOLVENT      CDCl3
NS           204
DS           4
SWH           $2027.534 MHz
FIDRES       0.403672 MHz
AQ           1.2386624 SEC
RG           3845.1
CM           37.800 uSAC
DE           6.00 uSAC
TE           300.0 K
O1           3.60000000 SEC
O11          0.60000000 SEC
O12          0.60000000 SEC
-----
***** CHANNEL f1 *****
NUC1         13C
P1           12.00 uSAC
PL1          0.00 dB
SFO1         62.9010000 MHz
-----
***** CHANNEL f2 *****
CPDPRG2     waltz16
NUC2         1H
PCPD2       130.00 uSAC
PL2          3.00 dB
PL12        10.00 dB
PL13        12.00 dB
SFO2        250.1310000 MHz
-----
F2 - Processing parameters
SI           32768
SF           62.9010000 MHz
KOH          EM
SFO          0
LB           1.00 MHz
GB           0
PC           1.40
-----
(0 MHz) 6101.90 parameters
CX           20.00 cm
F1           260.000 MHz
F2           125.760 MHz
F2P          0.000 MHz
PC          0.00 MHz
PUNCH       10.00000000 MHz
MDCM        629.58201 MHz
  
```

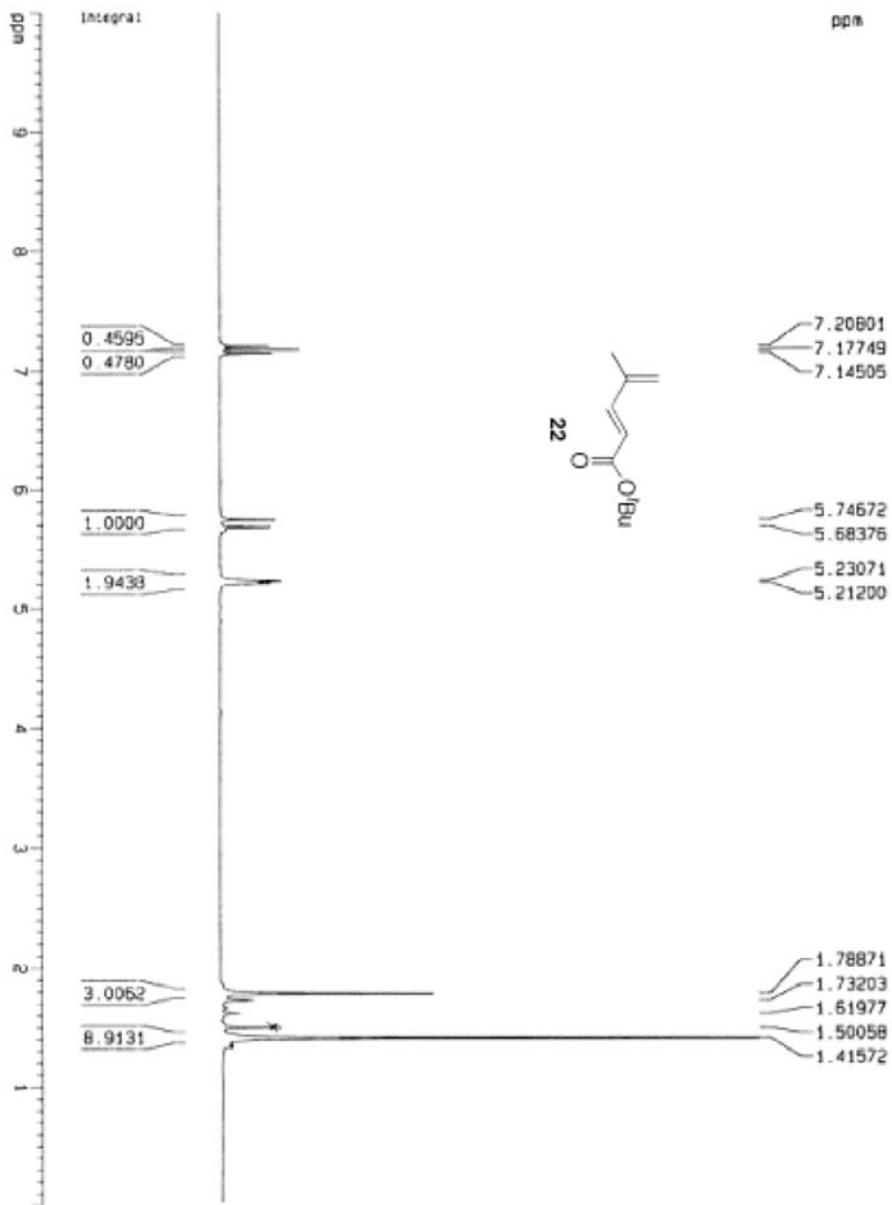

Current Data Parameters  
 NAME proton  
 EXPNO 1  
 PROCNO 1

F2 - Acquisition Parameters  
 Date\_ 20040413  
 Time 12.33  
 INSTRUM spect  
 PROBHD 5 mm BBI X Y  
 PULPROG zgpg30  
 TD 32768  
 SOLVENT CDCl3  
 NS 37  
 DS 4  
 SWH 6265.664 Hz  
 FIDRES 0.191213 Hz  
 AQ 2.5149364 sec  
 RG 512  
 DM 79.800 uS/c  
 DE 6.00 uS/c  
 TE 300.0 K  
 D1 1.00000000 sec

\*\*\*\*\* CHANNEL f1 \*\*\*\*\*  
 NUC1 1H  
 P1 6.50 uS/c  
 PL1 3.00 dB  
 SF01 250.1302371 MHz

F2 - Processing parameters  
 SI 16384  
 SF 250.1302370 MHz  
 KHM EM  
 SSB 0  
 LB 0.30 Hz  
 GB 0  
 PC 1.00

1D NMR plot parameters  
 CX 20.00 cm  
 FSF 10.000 ppm  
 F1 250.1302370 MHz  
 F2 0.000 ppm  
 FWHM 0.00 Hz  
 PPMCK 0.50000 ppm/cm  
 HZCM 125.00000 Hz/cm

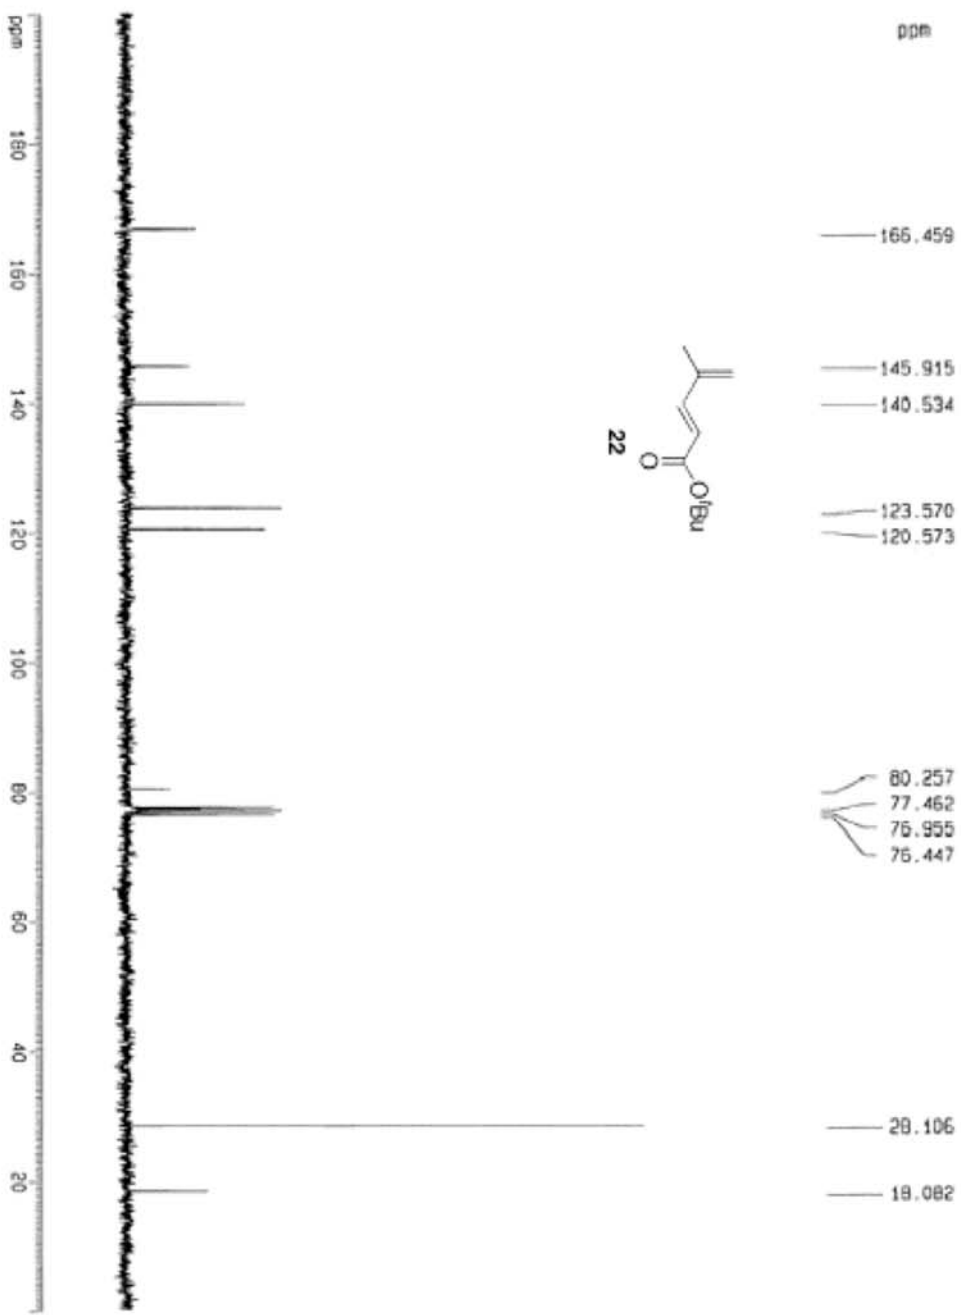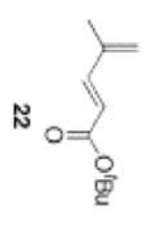

Current Data Parameters  
 NAME Carbon  
 EXPNO 1  
 PROCNO 1

F2 - Acquisition Parameters

Date\_ 20040327  
 Time 9.37  
 INSTRUM spect  
 PROBHD 5 mm BBI X Y  
 PULPROG zgpg30  
 TO 32768  
 SOLVENT CDCl3  
 NS 209  
 DS 2  
 SWH 15243.902 Hz  
 FIDRES 0.465207 Hz  
 AQ 1.0748404 sec  
 RG 6502  
 DM 32.800 usec  
 DE 6.00 usec  
 TE 300.0 K  
 012 0.00002000 sec  
 PL13 32.00 dB  
 01 3.00000000 sec  
 CPGPRG2 waltz16  
 PCPD2 130.00 usec  
 SF02 250.1310005 MHz  
 NUC1 1H  
 P1 3.00 dB  
 PL12 30.00 dB  
 P1 12.50 usec  
 SF01 62.5015074 MHz  
 NUC1 13C  
 PL1 0.00 dB  
 011 0.03000000 sec

F2 - Processing parameters  
 SI 32768  
 SF 62.8952558 MHz  
 WCN EM  
 SSB 0  
 LB 2.00 Hz  
 GB 0  
 PC 1.40

10 MHz plot parameters  
 CK 20.00 cm  
 F3P 200.000 ppm  
 F1 12579.65 Hz  
 F2P 0.000 ppm  
 F2 0.00 Hz  
 SFOCM 10.00000 ppm/cm  
 HQCM 628.95258 Hz/cm



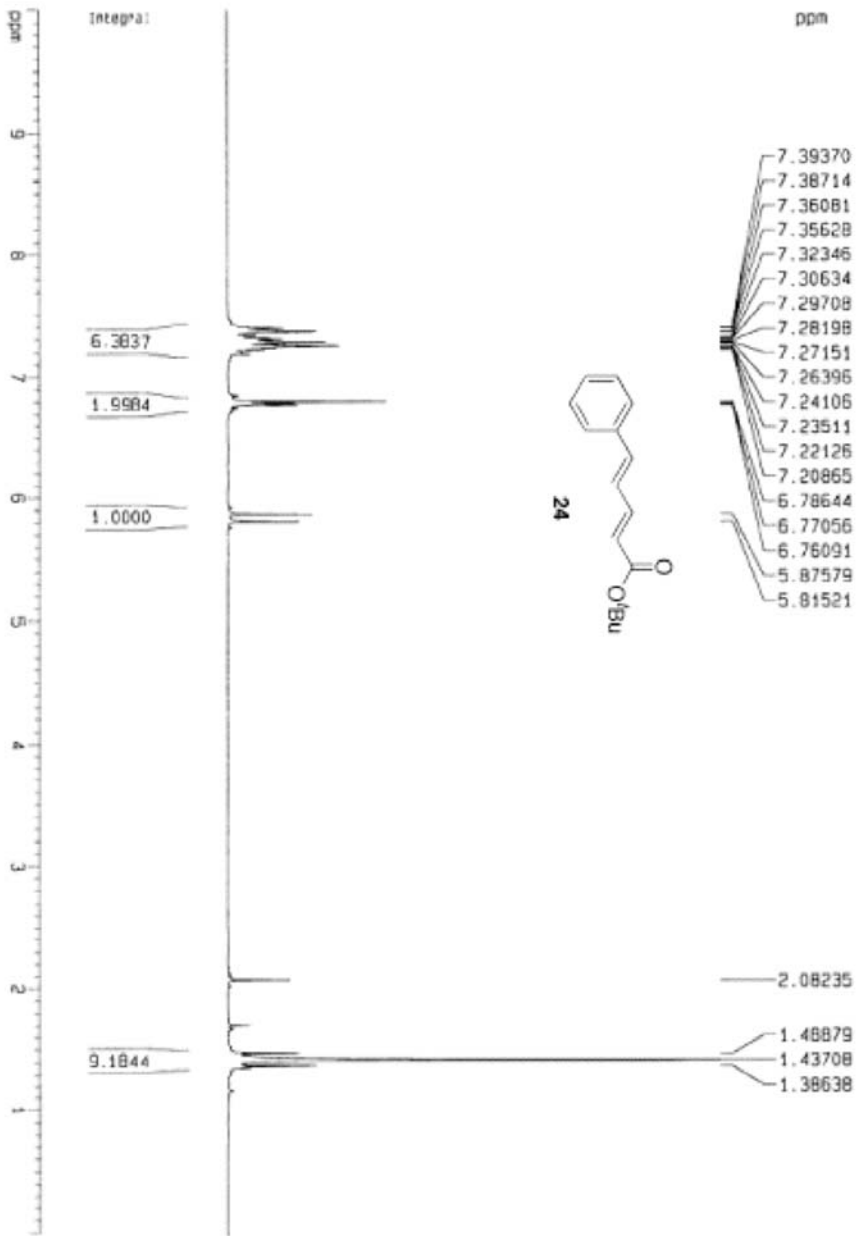

Current Data Parameters  
NAME proton  
EXPNO 1  
PROCNO 1

F2 - Acquisition Parameters  
Date\_ 20040308  
Time 19.16  
INSTRUM spect  
PROBHD 5 mm BBI X V  
PULPROG zg30  
TD 32768  
SOLVENT CDCl3  
NS 32  
DS 4  
SWH 6285.664 Hz  
FIDRES 0.191213 Hz  
AQ 2.6149264 sec  
RG 128  
DM 75.800 usac  
DE 6.00 usac  
TE 300.0 K  
D1 1.00000000 sec

\*\*\*\*\* CHANNEL f1 \*\*\*\*\*  
NUC1 1H  
P1 6.50 usac  
PL1 3.00 dB  
SFO1 250.1303371 MHz

F2 - Processing parameters  
SI 16384  
SF 250.1303370 MHz  
WDW EM  
SSB 0  
LB 0.30 Hz  
GB 0  
PC 1.00

NO NMR plot parameters  
CX 20.00 ca  
F1P 10.000 ppm  
F1 250.130 MHz  
F2P 0.000 ppm  
F2 0.00 Hz  
PRACM 0.00000 ppm/cm  
HZCM 125.00502 Hz/cm

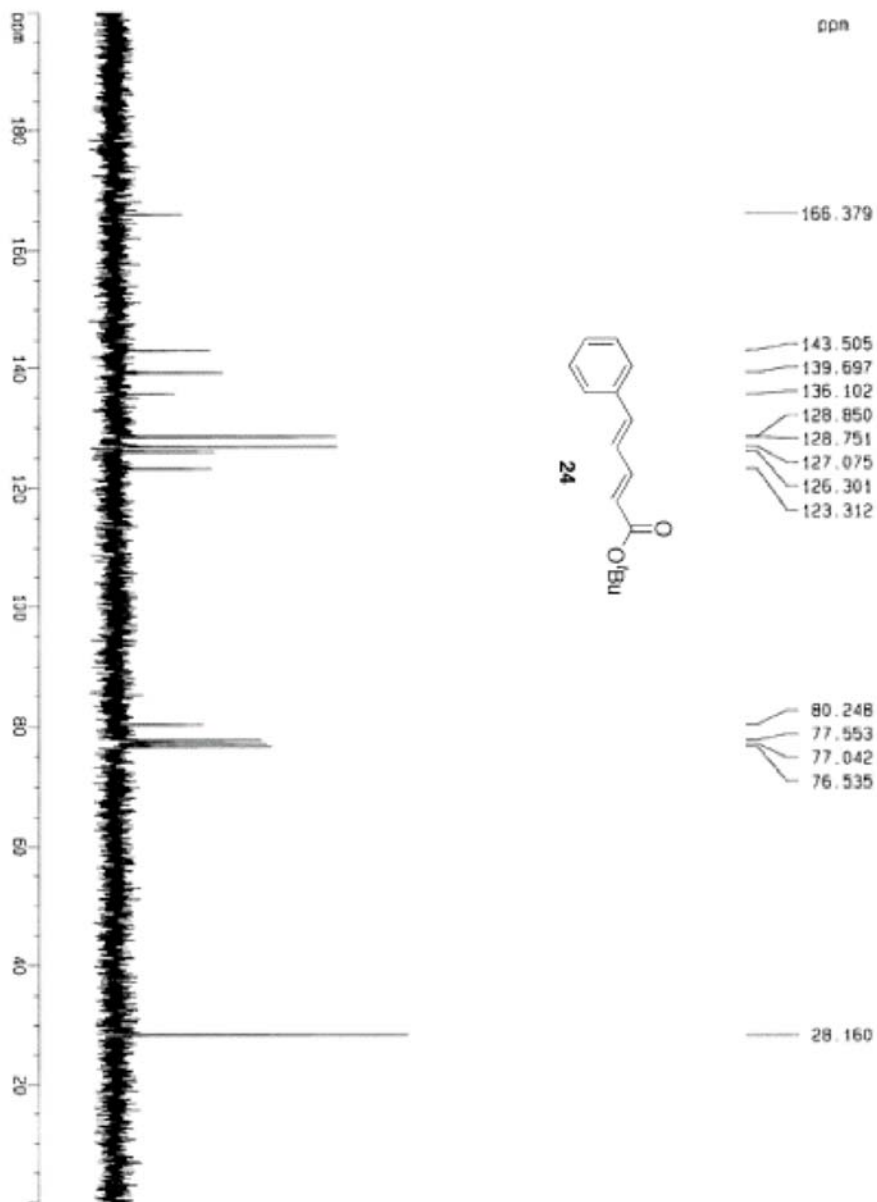

```

Current Data Parameters
NAME          c2000
EXPNO        1
PROCNO       1

F2 - Acquisition Parameters
DATE_        20040205
TIME         14.54
INSTRUM      spect
PROBHD       5 mm BBI X Y
PULPROG      zgpg30
TD            65536
SOLVENT      CDCl3
NS           58
DS           4
SWH           13027.514 Hz
FIDRES       0.403672 Hz
AQ           1.2300604 sec
RG           13004
OR           37.800 uirc
DE           6.00 uirc
TE           300.0 K
D1           2.00000000 sec
D11          0.30000000 sec
D12          0.00000000 sec

***** CHANNEL f1 *****
NUC1          13C
P1           12.50 uirc
PL1          0.00 dB
SFO1         62.90150315 MHz

***** CHANNEL f2 *****
ORIGIN2      waltz16
NUC2          1H
PCPD2       130.00 uirc
PCPD2       SH
PCPD2       1.00 dB
PL2          0.00 dB
PL12        20.00 dB
PL13        20.00 dB
SFO2        250.1310005 MHz

F2 - Processing parameters
SI           32768
SF           62.90150310 MHz
RG           0
KOP          0
SFB         0
LB           1.00 Hz
GB           0
PC           1.40

1D NMR 0101 parameters
CX           20.00 cm
F1P          210.00000000 MHz
F2P          12579.05 MHz
F2Q          0.00000000 MHz
SFO1CM      62.90150310 MHz/cm
SFO2CM      250.13100050 MHz/cm
  
```

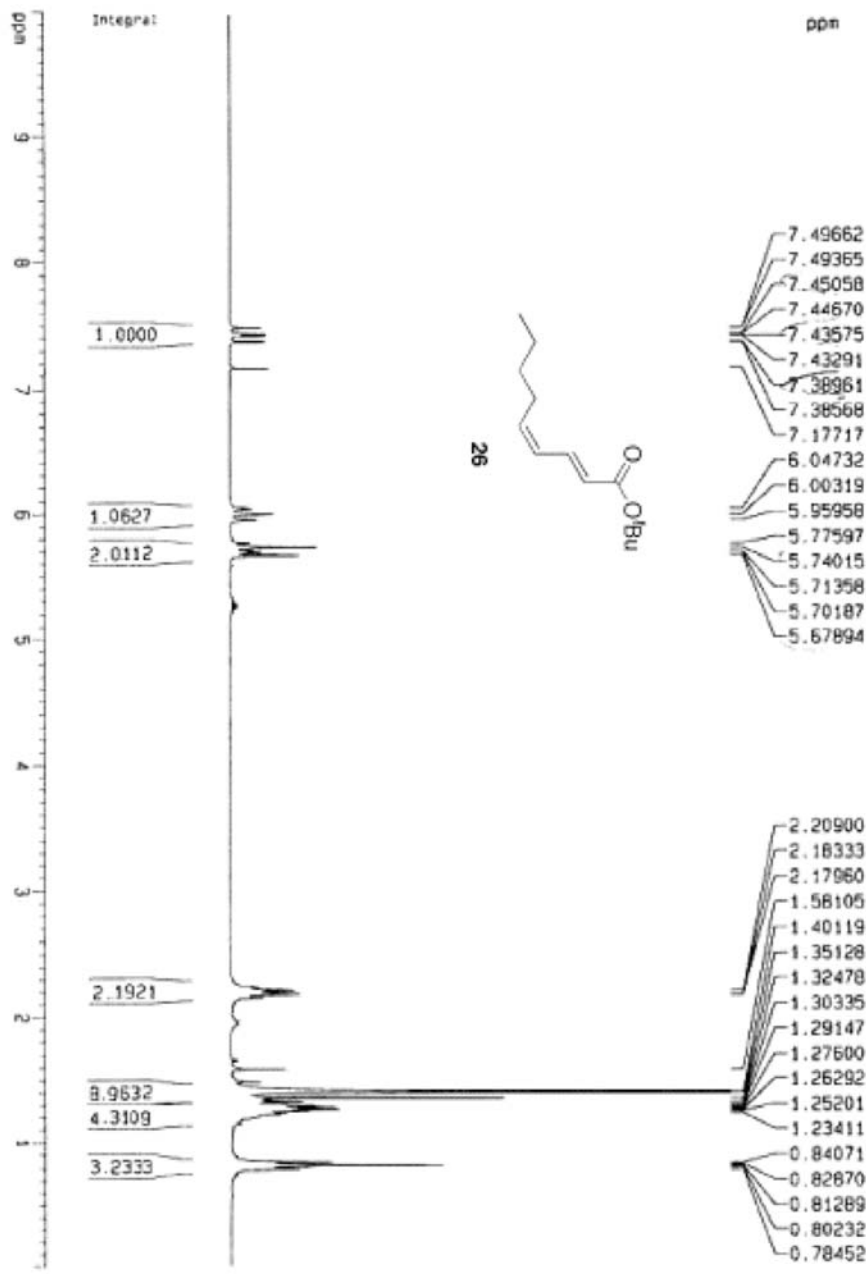

Current Data Parameters

|        |        |
|--------|--------|
| NAME   | proton |
| EXPNO  | 1      |
| PROCNO | 1      |

F2 - Acquisition Parameters

|         |                |
|---------|----------------|
| Date_   | 20100324       |
| Time    | 14.34          |
| INSTRUM | SDPC1          |
| PROBHD  | 5 mm BBI X Y   |
| PULPROG | zg30           |
| TD      | 32768          |
| SOLVENT | CDCl3          |
| NS      | 8              |
| DS      | 4              |
| SWH     | 6285.654 Hz    |
| FIDRES  | 0.191213 Hz    |
| AQ      | 2.6149364 Sec  |
| RG      | 181            |
| DE      | 79.070 usec    |
| TE      | 300.0 K        |
| TD      | 1.00000000 sec |

\*\*\*\*\* CHANNEL f1 \*\*\*\*\*

|      |                 |
|------|-----------------|
| NUC1 | <sup>1</sup> H  |
| P1   | 6.50 usec       |
| PL1  | 3.00 dB         |
| SFO1 | 250.1303371 MHz |

F2 - Processing parameters

|     |                 |
|-----|-----------------|
| SI  | 16384           |
| SF  | 250.1303280 MHz |
| KCN | EM              |
| SSB | 0               |
| LB  | 0.30 Hz         |
| GB  | 0               |
| PC  | 1.00            |

1D NMR plot parameters

|       |                 |
|-------|-----------------|
| CX    | 20.00 cm        |
| F1P   | 10.000 dB       |
| F1    | 2501.30 Hz      |
| F2P   | 0.000 dB        |
| F2    | 0.00 Hz         |
| PHC1A | 0.50000 dB/cm   |
| HZCM  | 125.06250 Hz/cm |

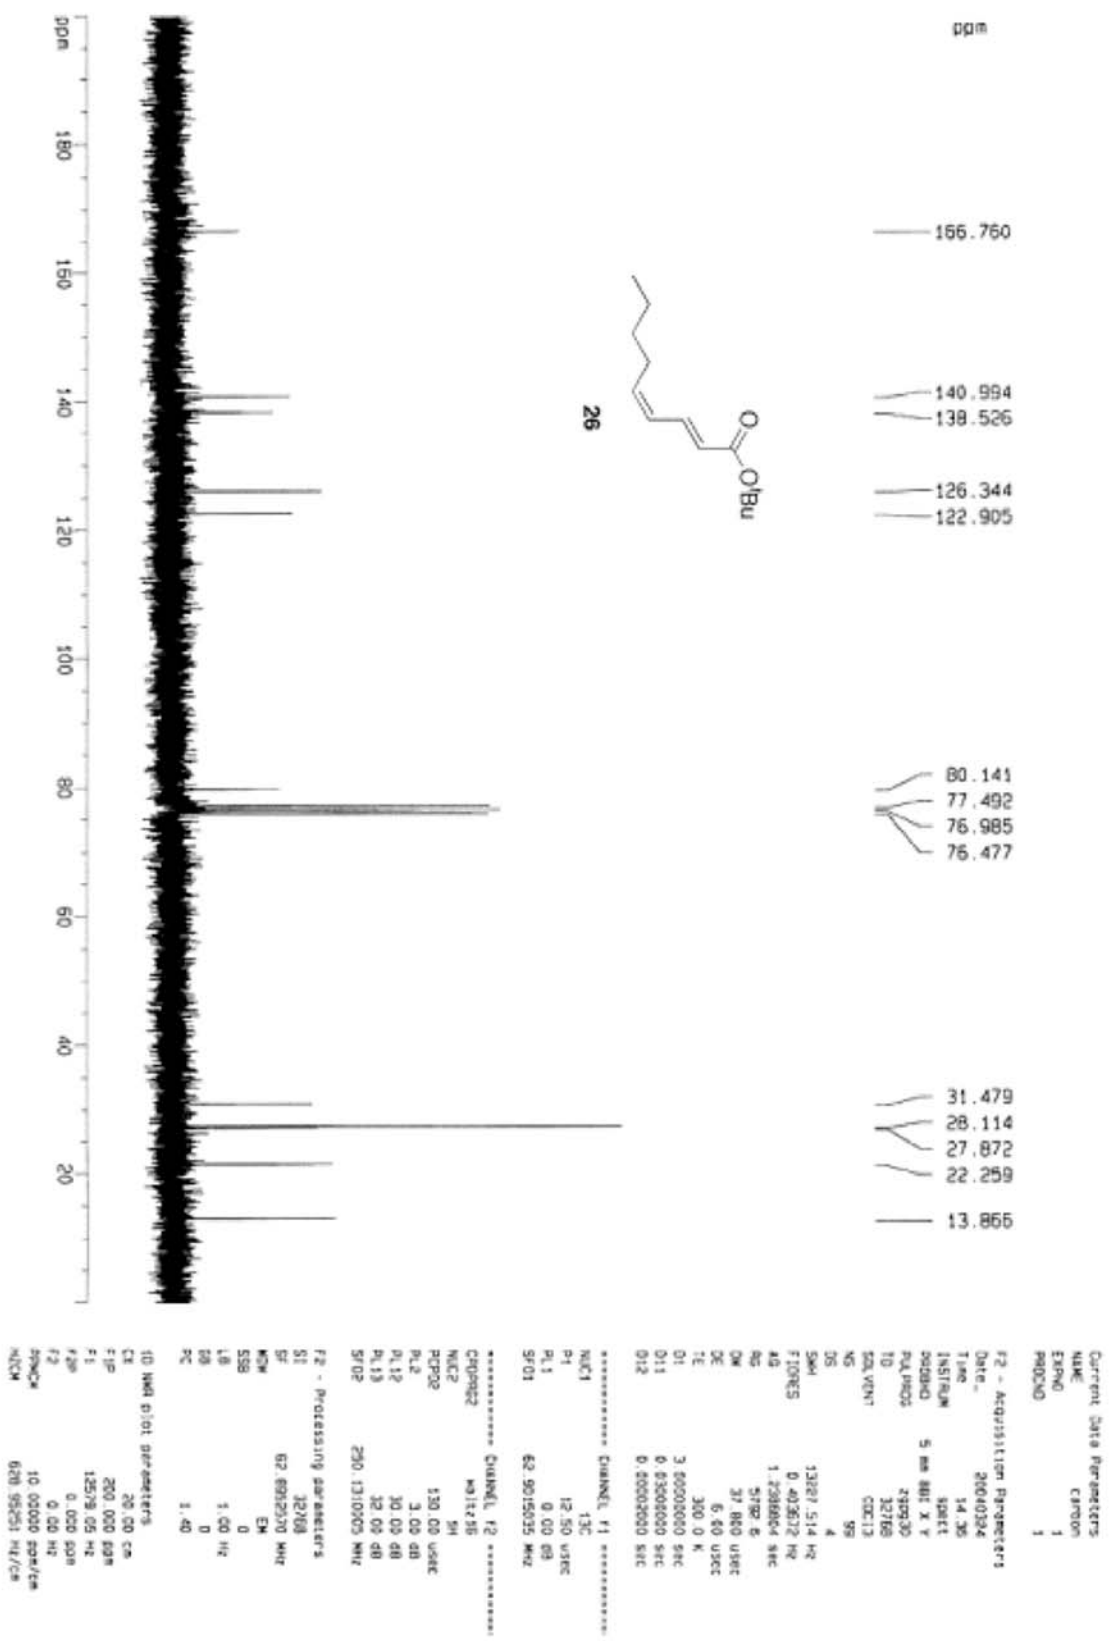

Current Data Parameters  
 NAME Carbon  
 EXPNO 1  
 PROCNO 1

F2 - Acquisition Parameters  
 Date\_ 20040304  
 Time 14.35  
 INSTRUM spect  
 PROCNO 5  
 PULPROG zgpg30  
 TD 32768  
 SFO 125.000  
 SOLVENT CDCl3  
 NS 512  
 DS 4  
 SWH 13027.514 Hz  
 FIDRES 0.403572 Hz  
 AQ 1.7298804 sec  
 RG 512  
 CW 37.860 USEC  
 DE 6.60 USEC  
 TE 300.0 K  
 O1 3.00000000 SEC  
 O11 0.83000000 SEC  
 O12 0.00000000 SEC

\*\*\*\*\* CHANNEL F1 \*\*\*\*\*  
 NUC1 13C  
 P1 12.50 USEC  
 PL1 0.00 DB  
 SFO1 62.9015035 MHz

\*\*\*\*\* CHANNEL F2 \*\*\*\*\*  
 CPDPRG2 waltz16  
 NUC2 1H  
 P2 5.00 USEC  
 PL2 3.00 DB  
 PL12 30.00 DB  
 PL13 32.00 DB  
 SFO2 250.1310000 MHz

F2 - Processing parameters  
 SI 32768  
 SF 62.8912500 MHz  
 KW EM  
 SSB 0  
 LB 1.00 Hz  
 GB 0  
 PC 1.40

10 MHz D101 parameters  
 CX 20.00 cm  
 FID 200.000 GAIN  
 F1 125.9505 MHz  
 F2 0.000 GAIN  
 SFO 10.00000000 MHz  
 SFO1 62.8912500 MHz

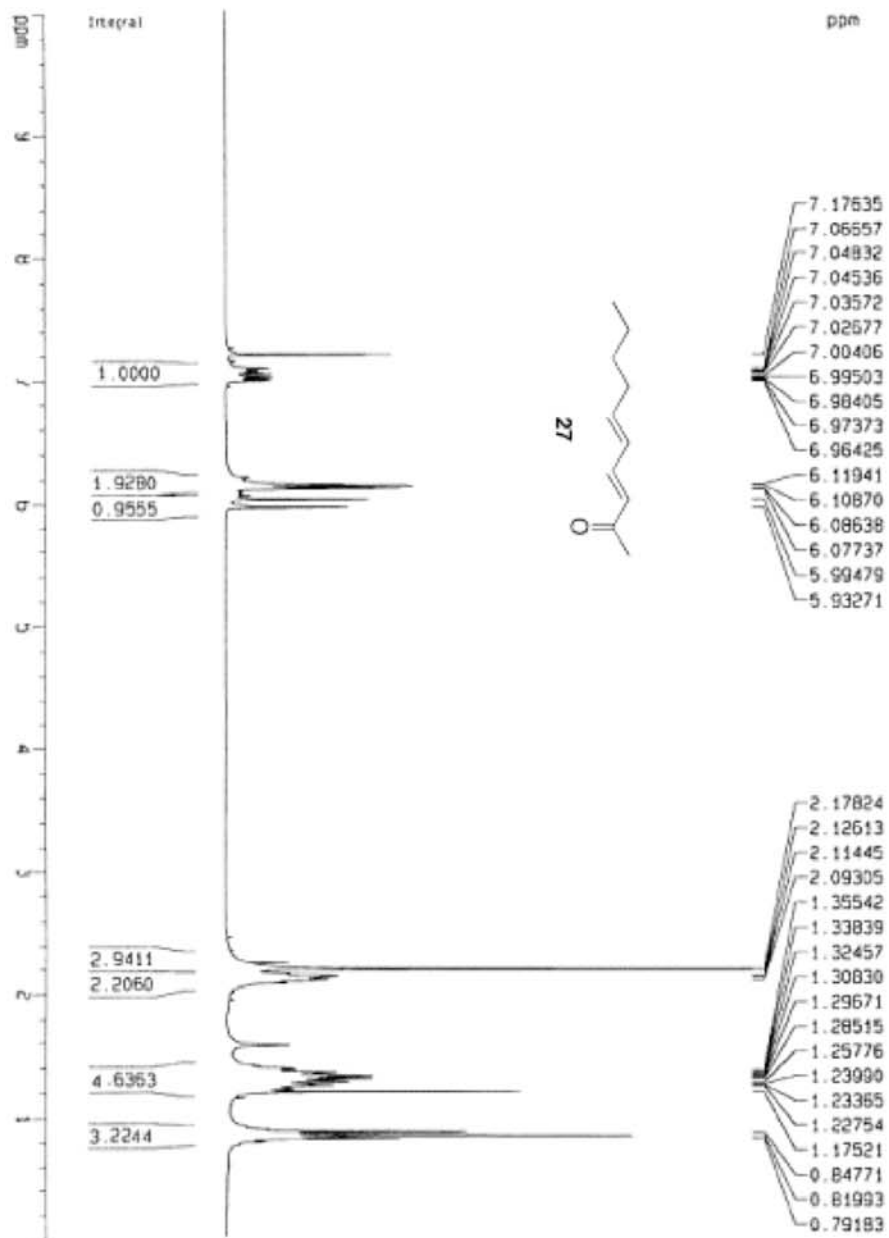

Current Data Parameters  
NAME proton  
EXPNO 1  
PROCNO 1

F2 - Acquisition Parameters  
Date\_ 20080413  
Time 12:33  
INSTRUM spect  
PROBHD 5 mm BBI X Y  
PULPROG zg30  
TO 32768  
SOLVENT CDCl3  
NS 37  
DS 4  
SWH 6289.664 Hz  
FIDRES 0.191213 Hz  
AQ 2.8149364 sec  
RG 512  
DM 79.800 usec  
DE 6.00 usec  
TE 300.0 K  
D1 1.00000000 sec

\*\*\*\*\* Channel f1 \*\*\*\*\*  
NUC1 1H  
P1 6.50 usec  
PL1 3.00 dB  
SFO1 200.1302371 MHz

F2 - Processing parameters  
SI 16384  
SF 200.1302370 MHz  
KOH FM  
SSB 0  
LB 0.30 Hz  
GB 0  
PC 1.00

1D NMR plot parameters  
CX 20.00 cm  
FSP 10.000 ppm  
F1 2501.30 Hz  
F2P 0.000 ppm  
F2 0.00 Hz  
PPMCK 0.50000 ppm/cm  
HZCM 125.05502 Hz/cm

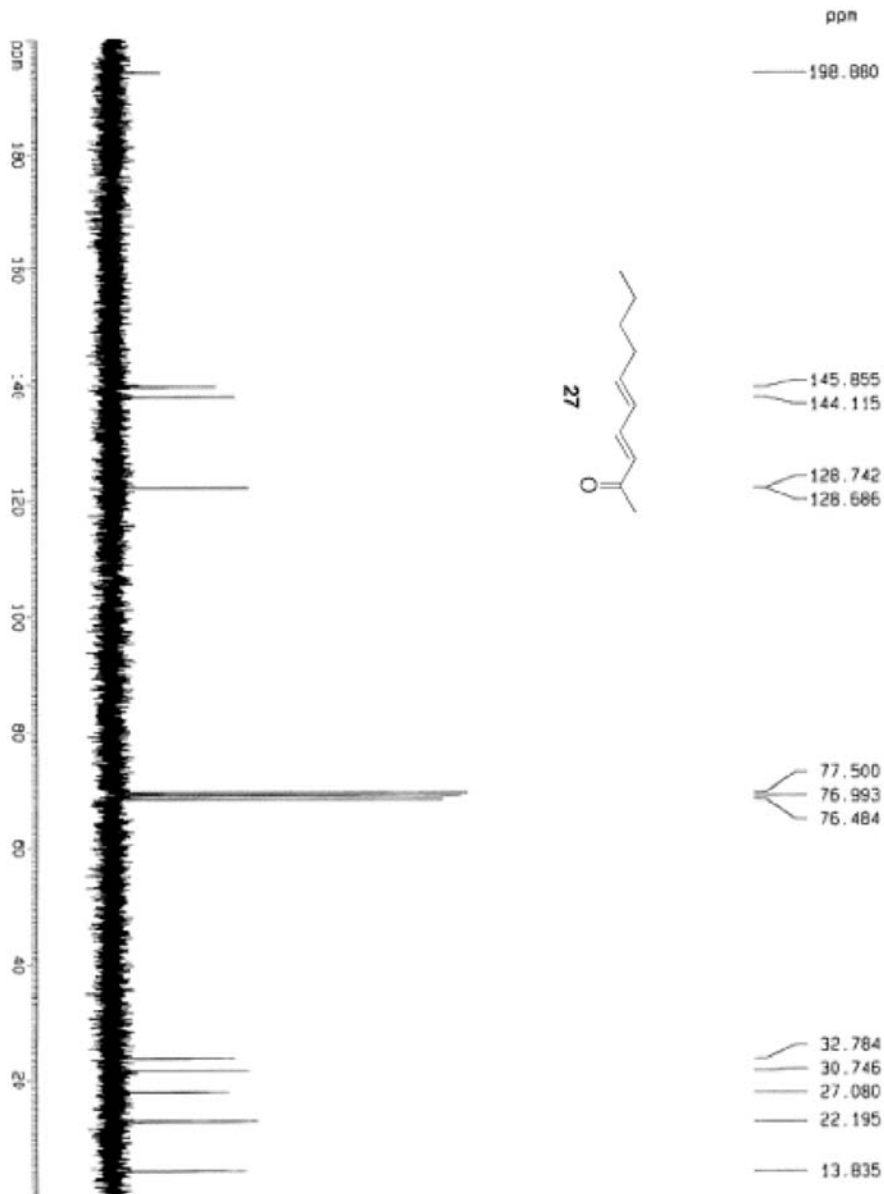

Current Data Parameters  
 NAME: carbon  
 EXPNO: 1  
 PROCNO: 1

F2 - Acquisition Parameters

Date\_ 20040716  
 Time 19:29  
 INSTRUM spect  
 PROBRW 5 mm BBI X Y  
 PULPROG zgpg30  
 TD 32768  
 SOLVENT CDCl3  
 NS 166  
 DS 4  
 SWH 13221.514 Hz  
 FIDRES 0.463872 Hz  
 AQ 1.2168804 sec  
 RG 5195.2  
 DM 31.869 usec  
 DE 6.09 usec  
 TE 300.2 K  
 O1 3.0000000 sec  
 O11 0.0300000 sec  
 O12 0.0000000 sec

\*\*\*\*\* CHANNEL f1 \*\*\*\*\*  
 NUC1 13C  
 P1 12.50 usec  
 PL1 0.00 dB  
 SF01 50.150335 MHz

\*\*\*\*\* CHANNEL f2 \*\*\*\*\*  
 CPDPRG2 waltz16  
 NUC2 1H  
 PCPD2 130.00 usec  
 PL2 3.00 dB  
 PL12 30.00 dB  
 PL13 32.00 dB  
 SF02 250.131005 MHz

F2 - Processing parameters

SI 32768  
 SF 50.1503350 MHz  
 KW 64  
 SFO 0  
 LB 1.00 Hz  
 DB 0  
 PC 1.40

10 1600 g1at parameters.

CX 20.00 cm  
 P1P 200.000 gpa  
 F1 12075.00 Hz  
 F2 0.000 50M  
 PRNCH 10.00000 gpa/cm  
 HZCM 528.95251 Hz/cm

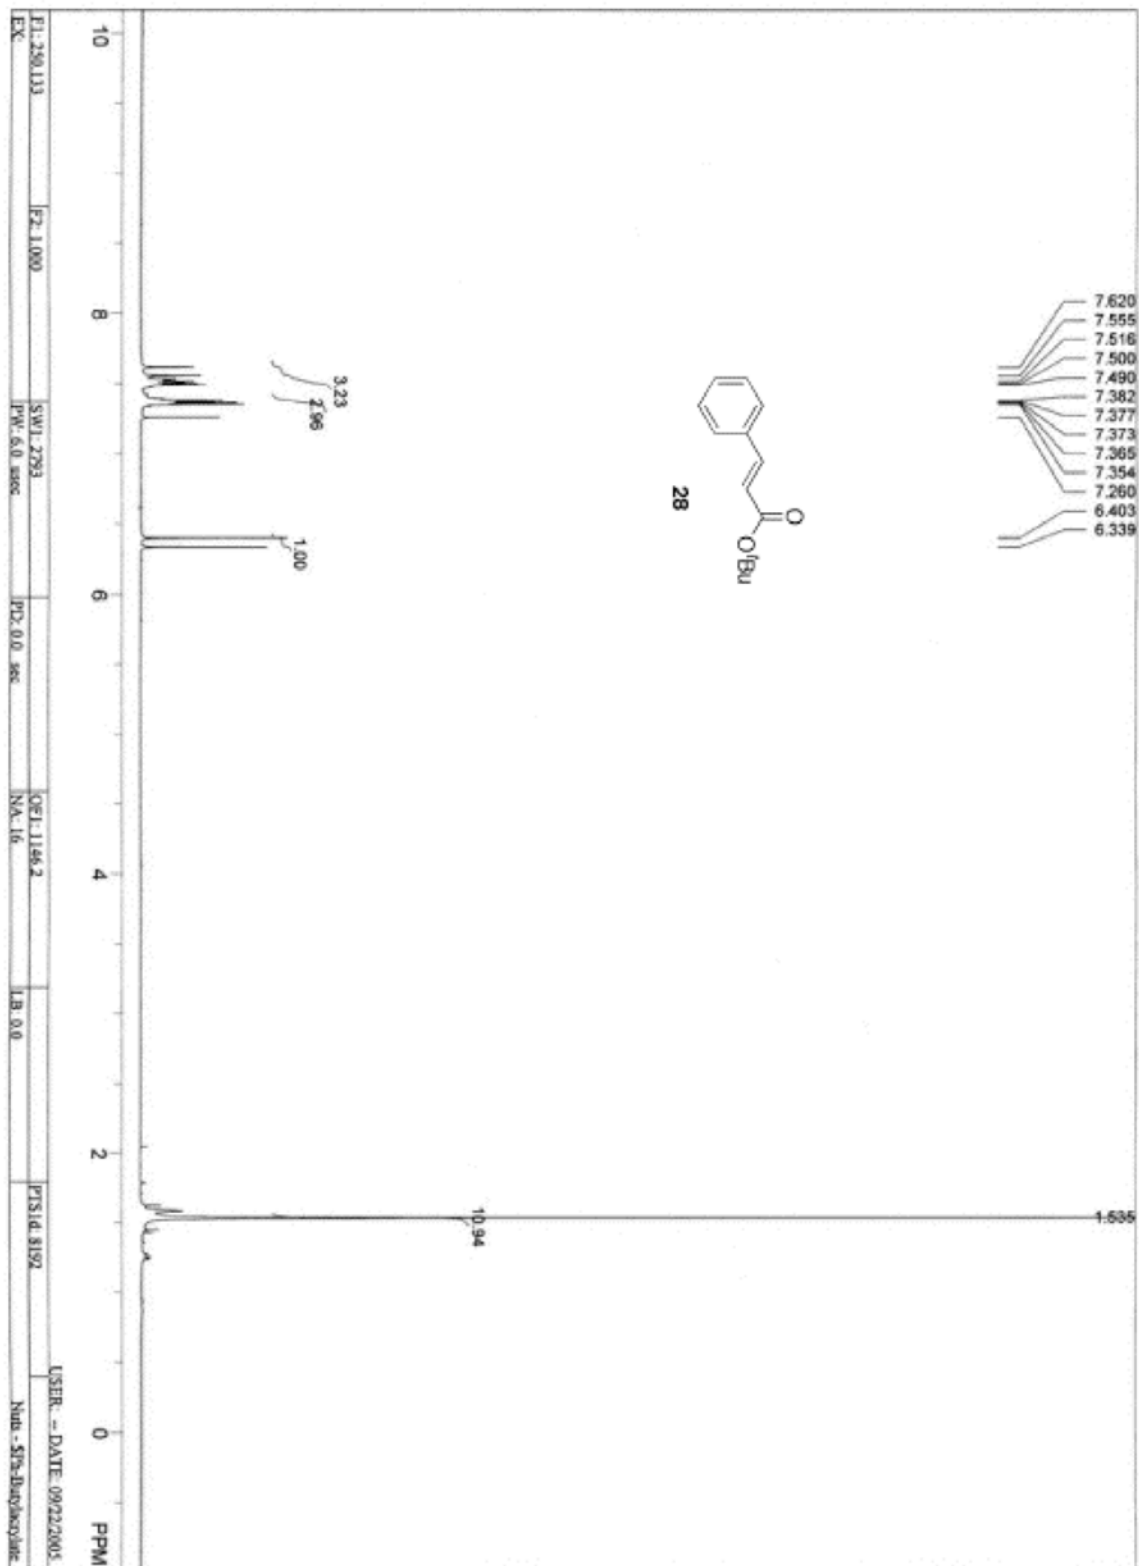





Methoxyphen-butylacrylate\_#2502000  
Archive directory: /afs/mona03/d1/jung/kyoo/umc-tye/data  
Sample directory: Methoxyphen-butylacrylate\_#2502000  
File: PROTON  
Pulse Sequence: zgpg30

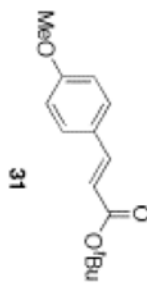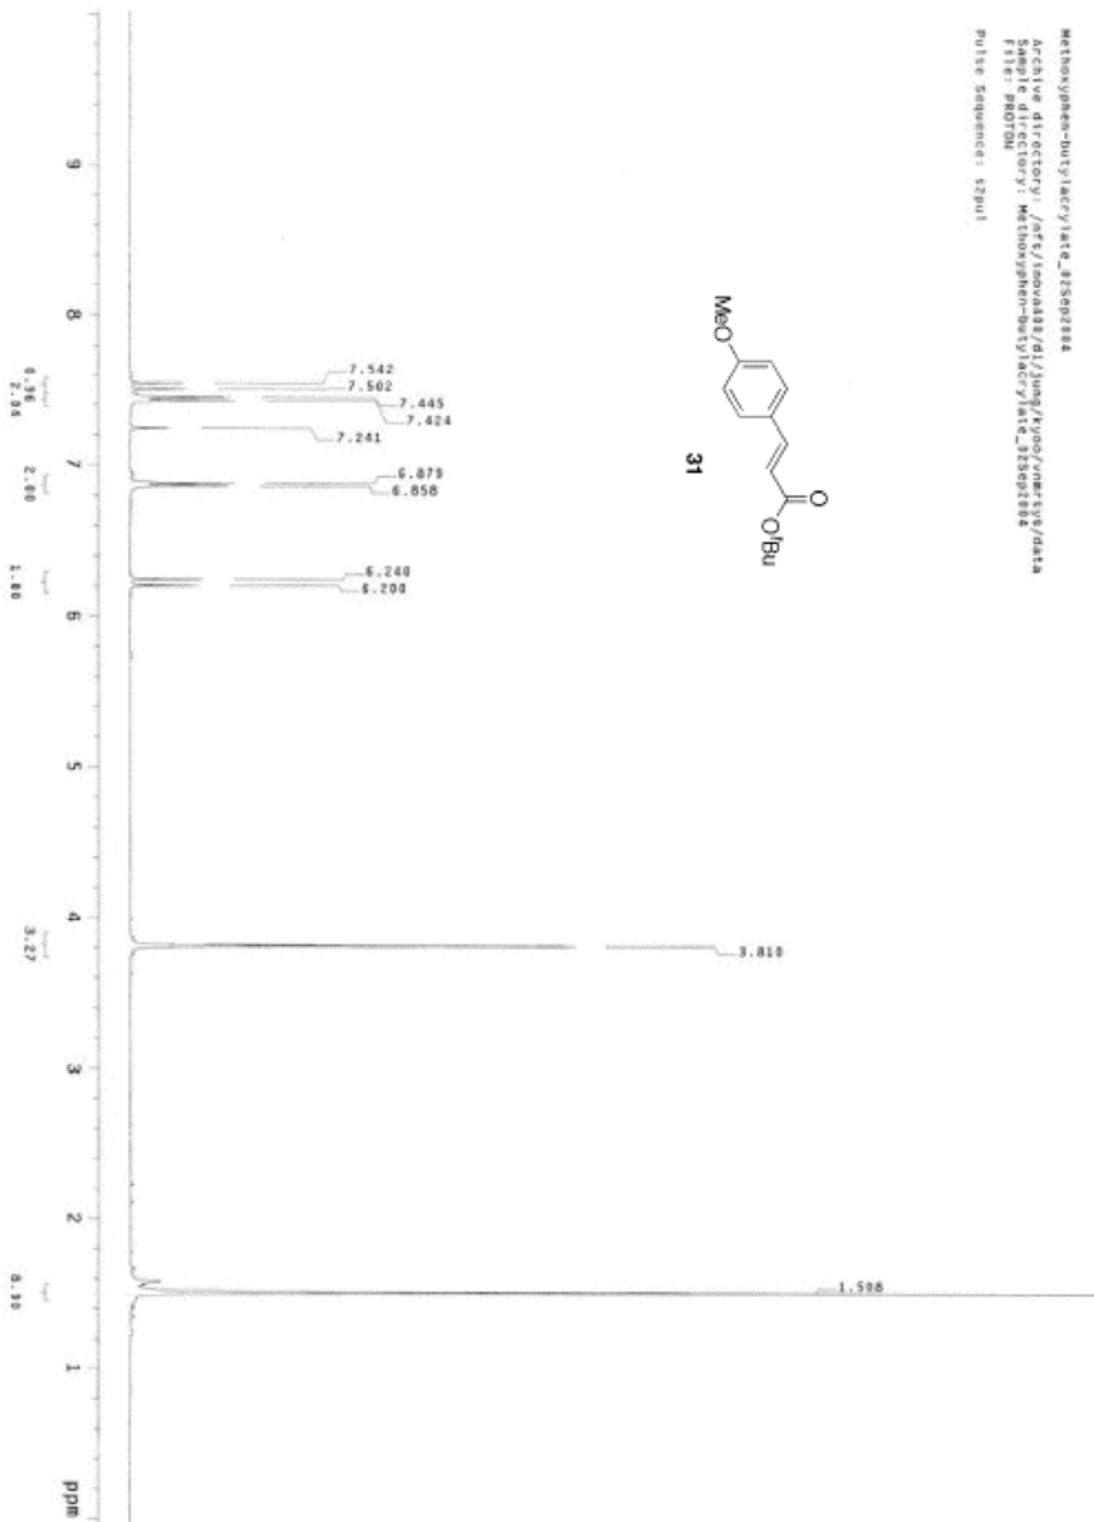

methoxyphen-butylacrylate\_02Sep2014  
Archive director : /afs/inovate9/c1/jung/kyoo/varsys/data  
Sample director : methoxyphen-butylacrylate\_02Sep2014  
File : C18001  
Pulse Sequence : zgpg31

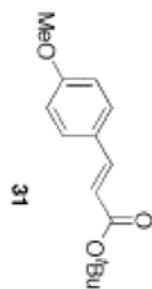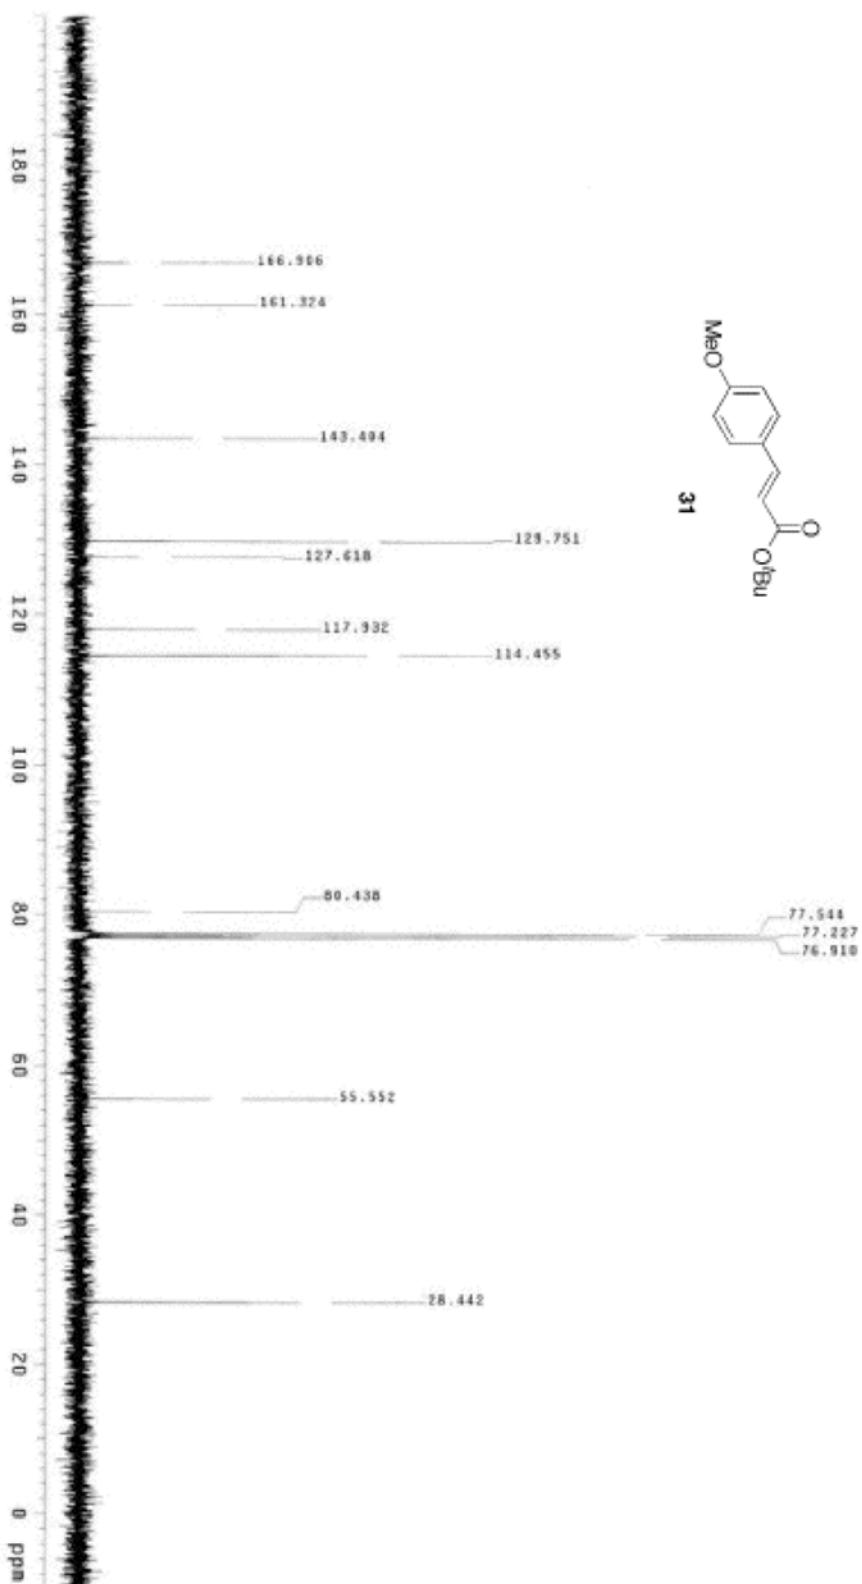

acphenyl-butylacrylate\_01Sep2004  
Archive directory: /nfs/inovaa00/d1/jung/kyoo/wmr/sfs/data  
Sample directory: acphenyl-butylacrylate\_01Sep2004  
File: PROTON  
Pulse Sequence: zgpg3

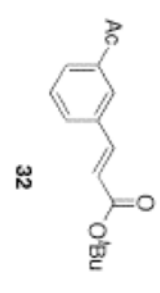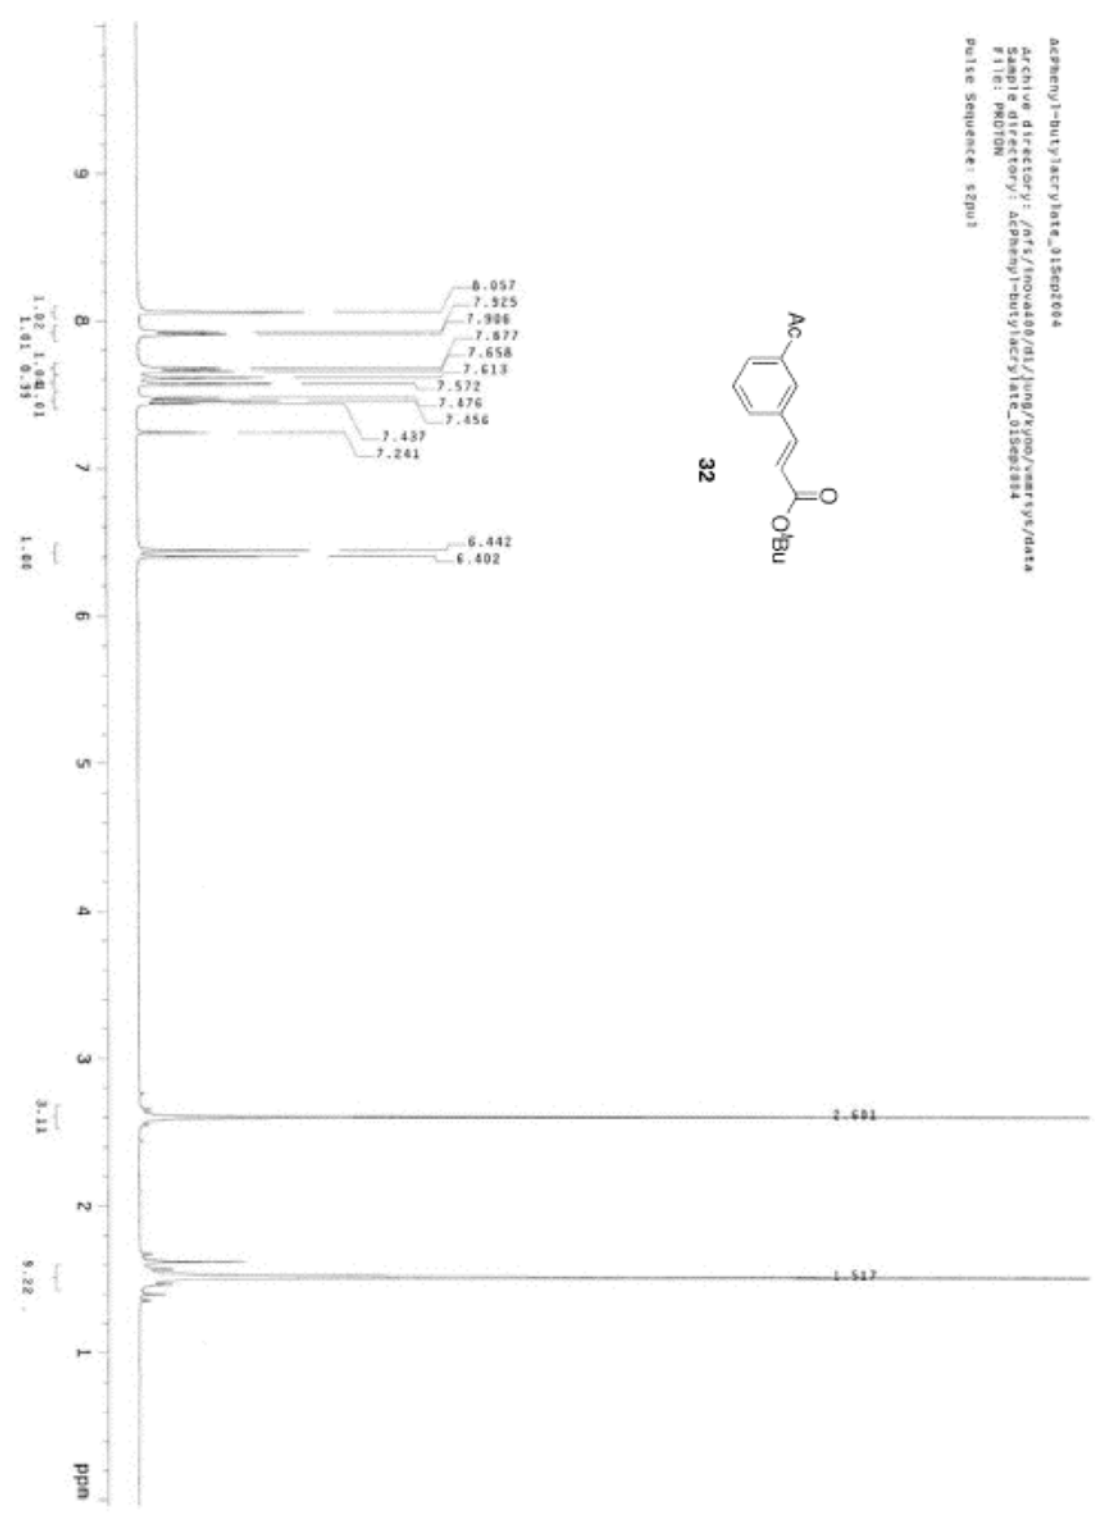

acphenyl-butylacrylate-C\_01Sep2004  
archive directory: /afs/innov80/d1/jung/kyoo/vmr-sys/data  
sample directory: acphenyl-butylacrylate-C\_01Sep2004  
file: CARSON  
pulse sequence: szput

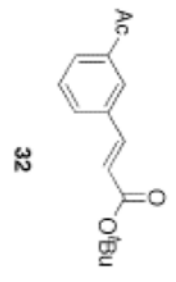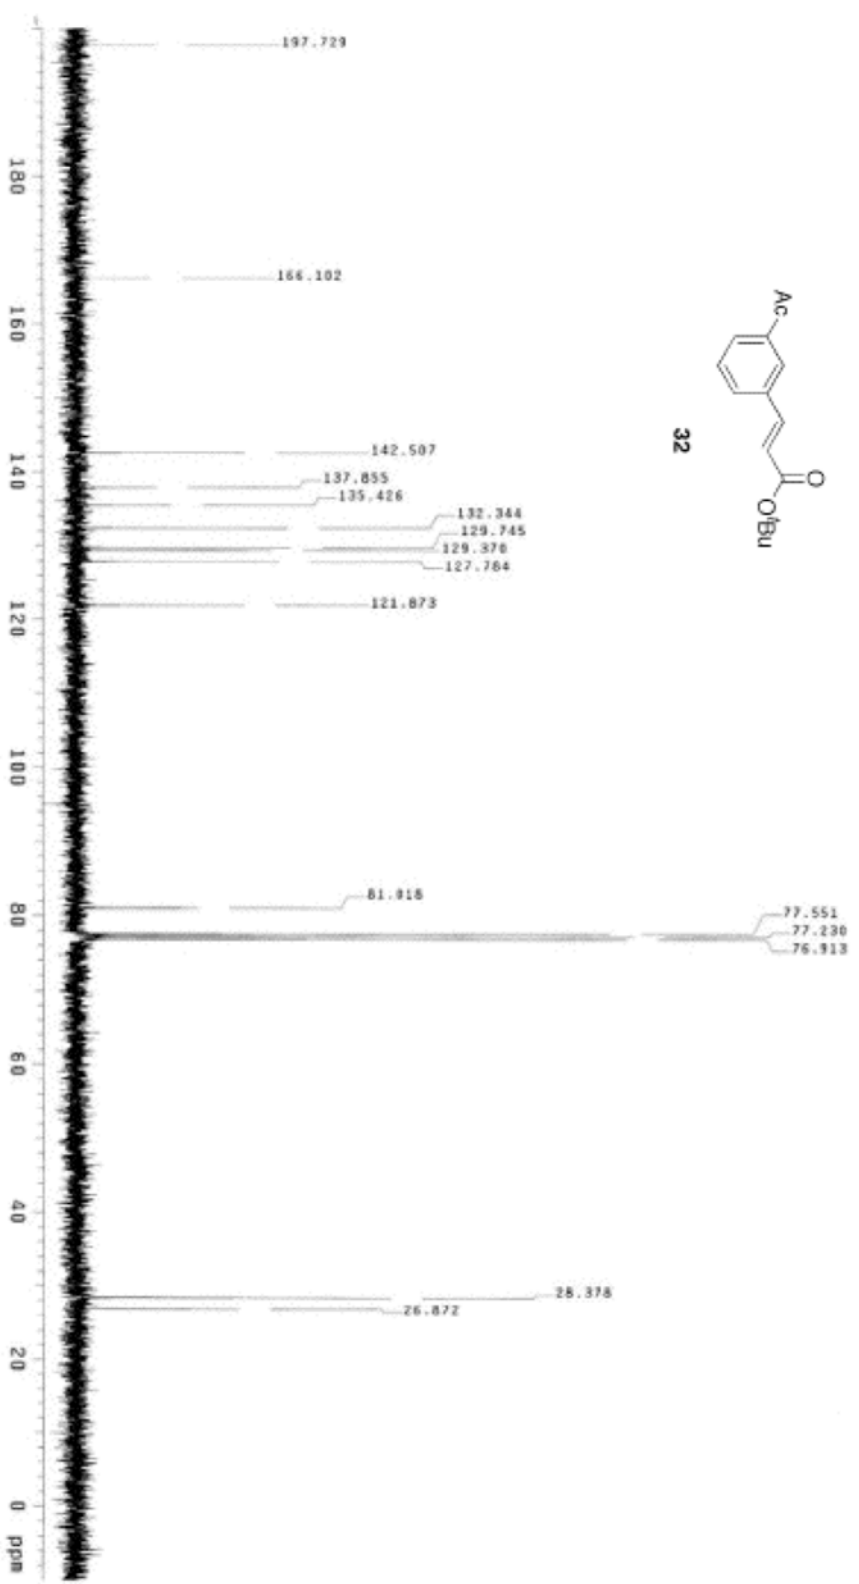

Pheny]-MWK\_03502000  
Archive directory: /afs/lnou.edu/af/jung/ynoo/umrcsps/data  
Sample directory: Pheny]-MWK\_03502000  
File: p80709  
Pulse Sequence: zgpg30

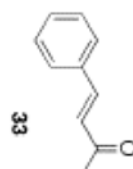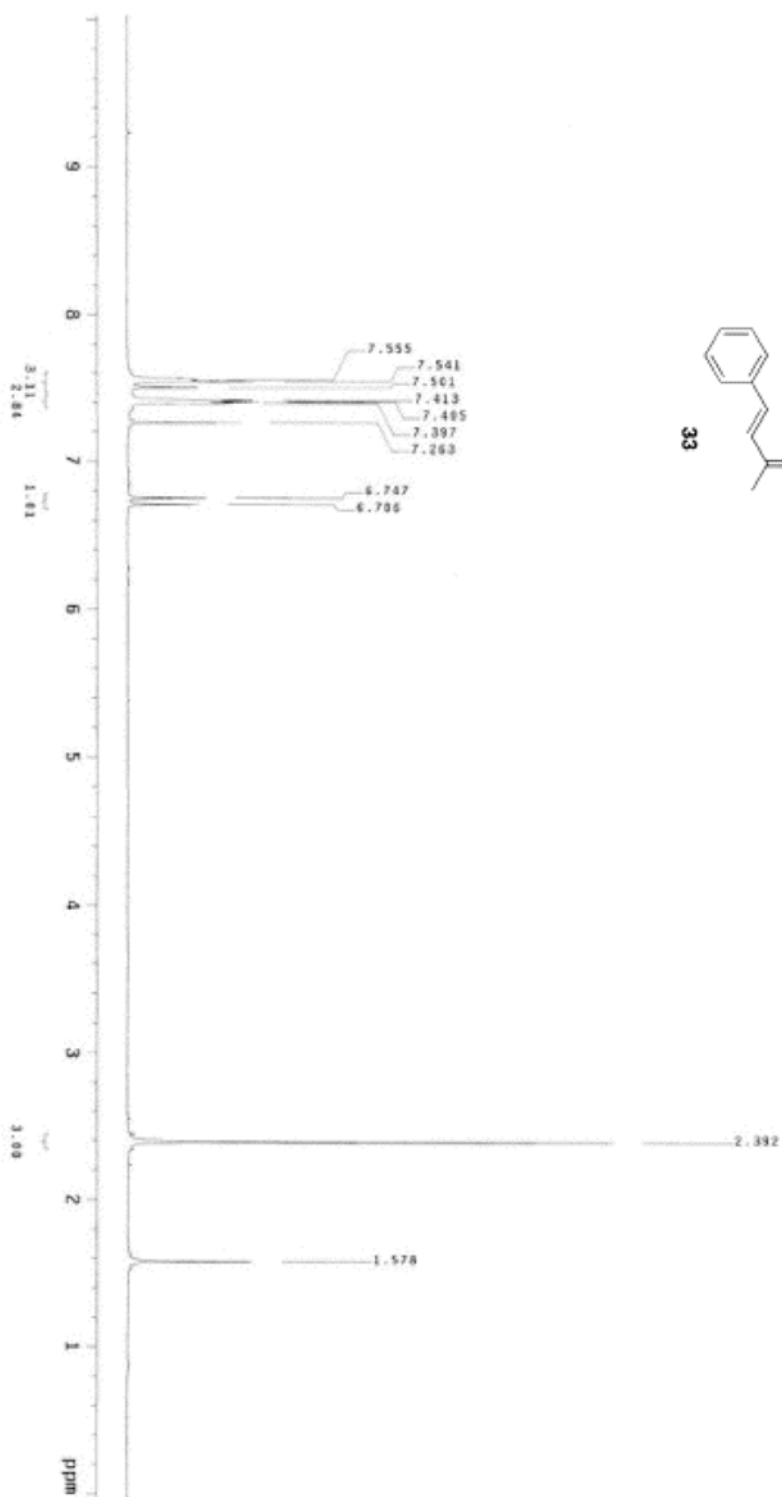

Pheny1-MVK\_83Sep2004  
Archive directory: /nfs/nova400/d1/jung/xyoo/vmr/sy5/data  
Sample directory: Pheny1-MVK\_83Sep2004  
File: CARBON  
Pulse Sequence: zgpg

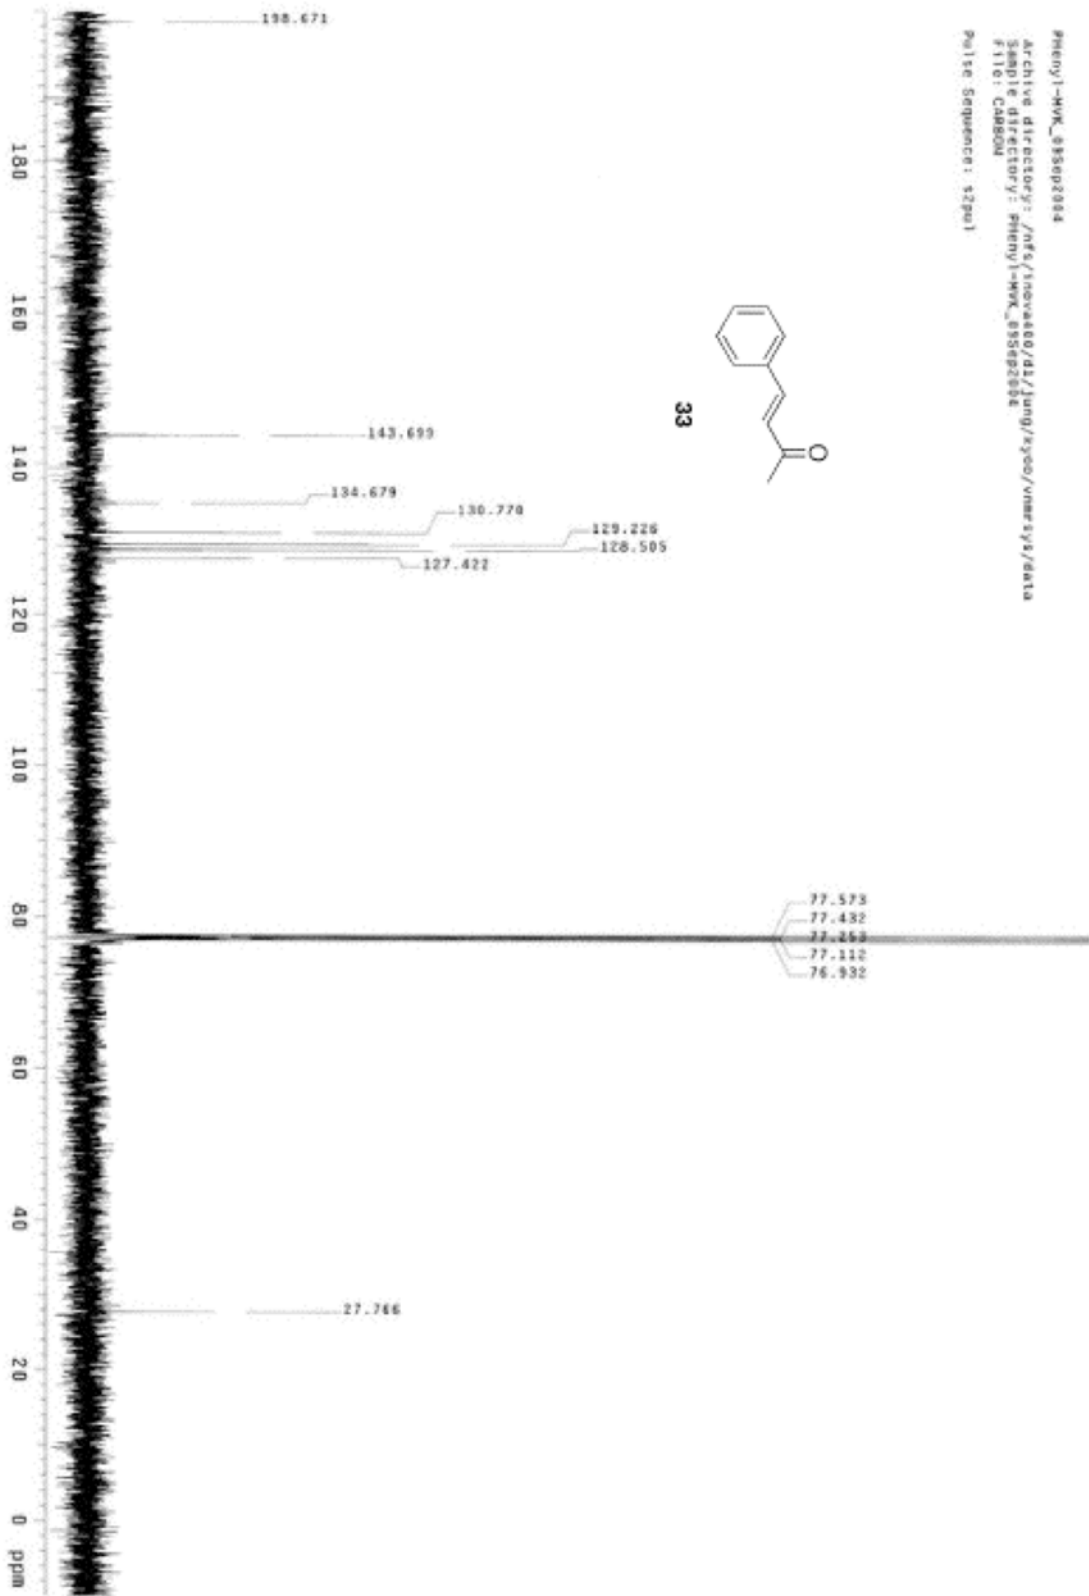

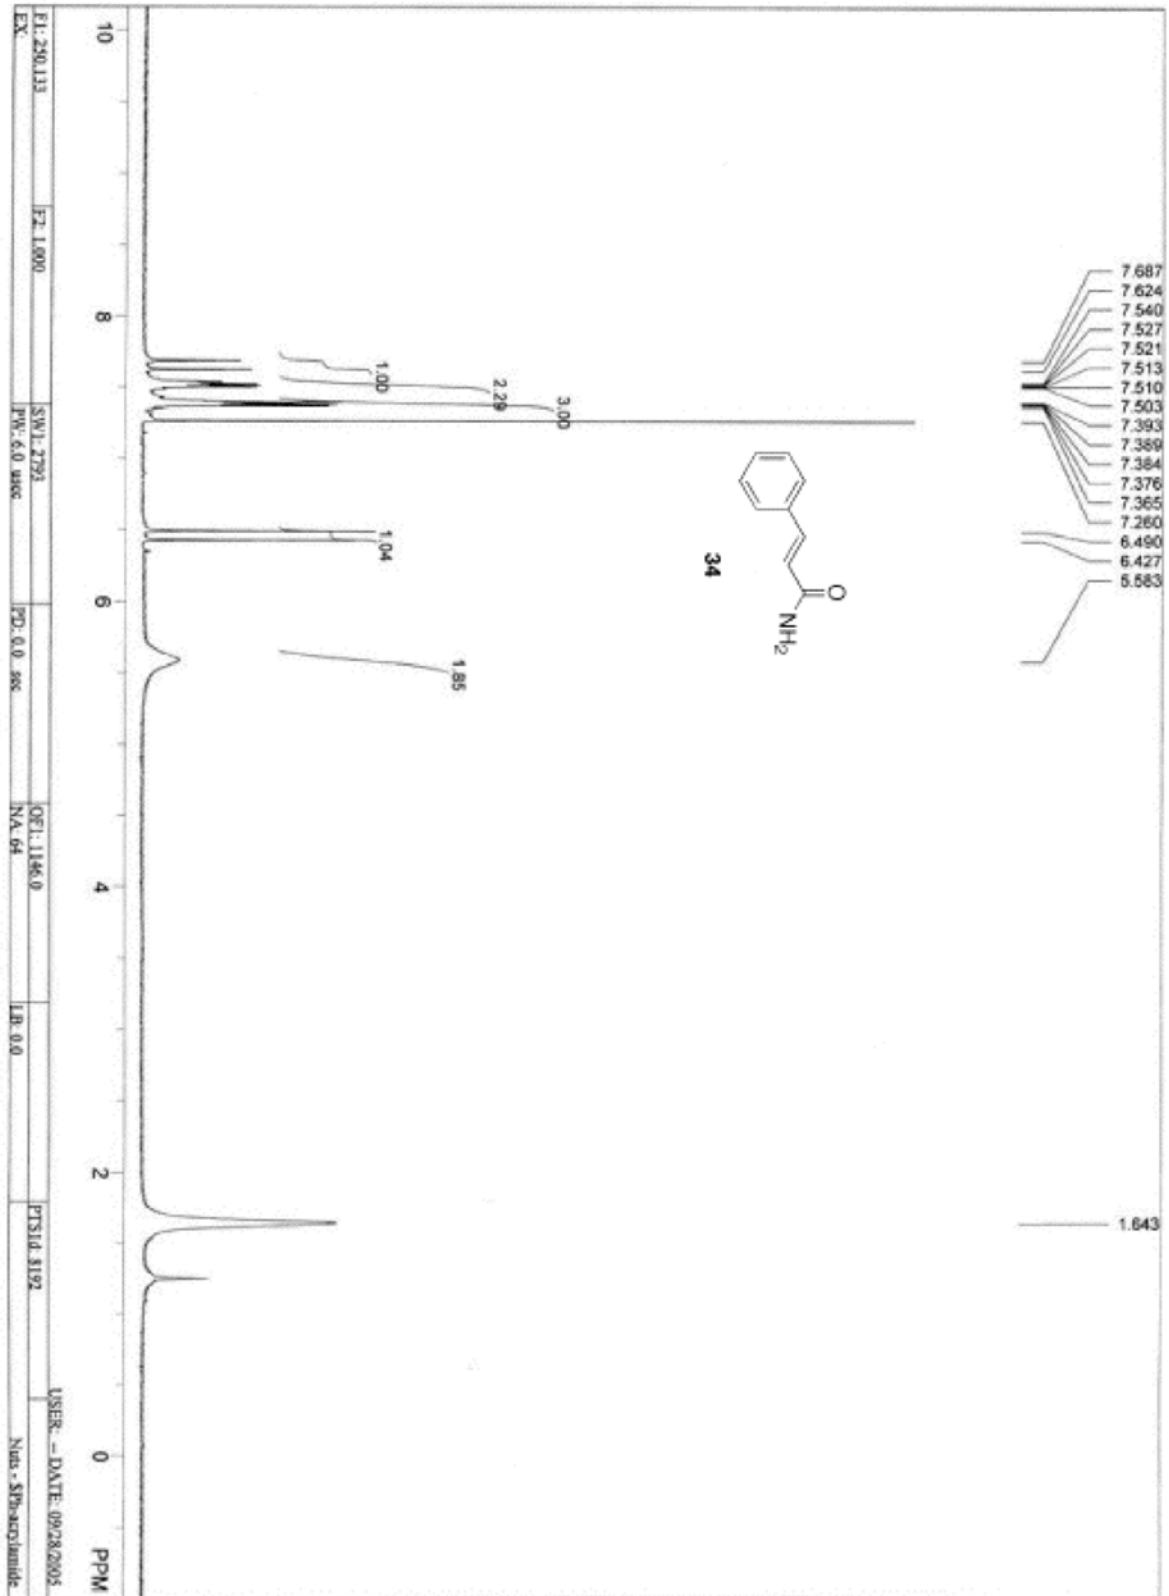

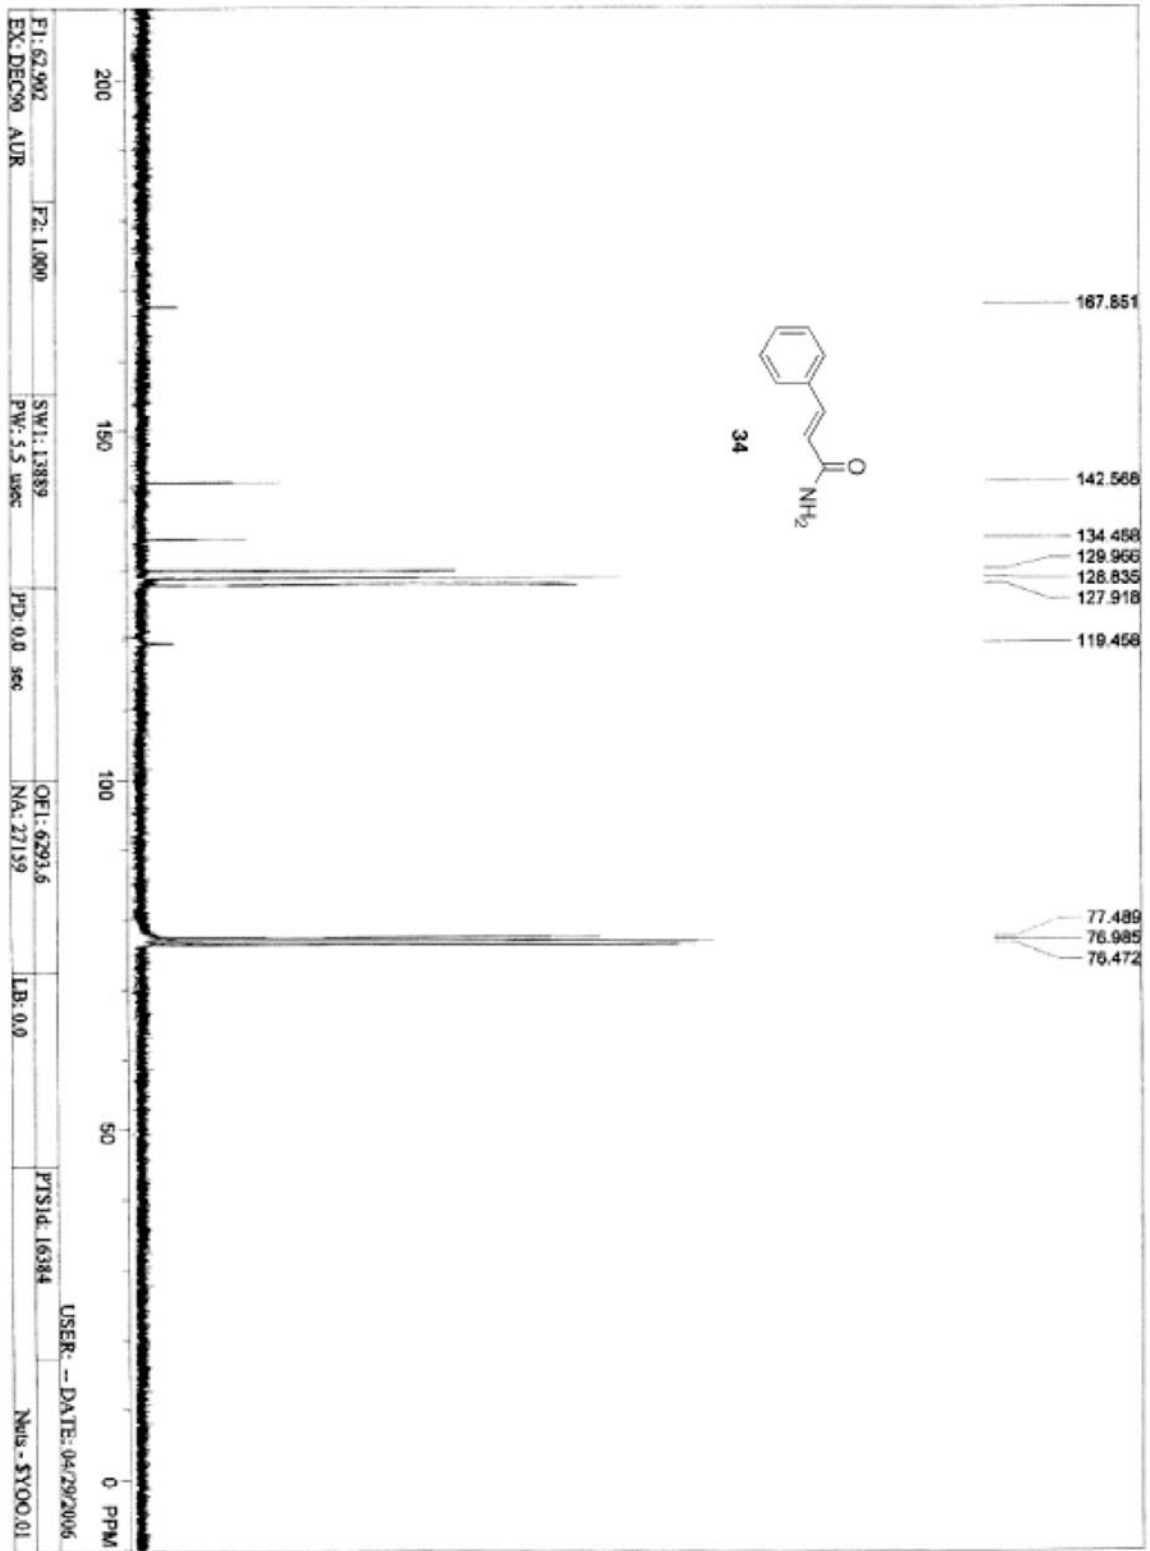



Phenyl-styren\_02847334  
Archive directory: /ntfs/Inovva800/01/Jung/xyco/vnmr/sps/data  
Sample directory: Phenyl-styren\_02847334  
File: PBDTON  
Pulse Sequence: zgpg1

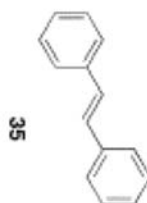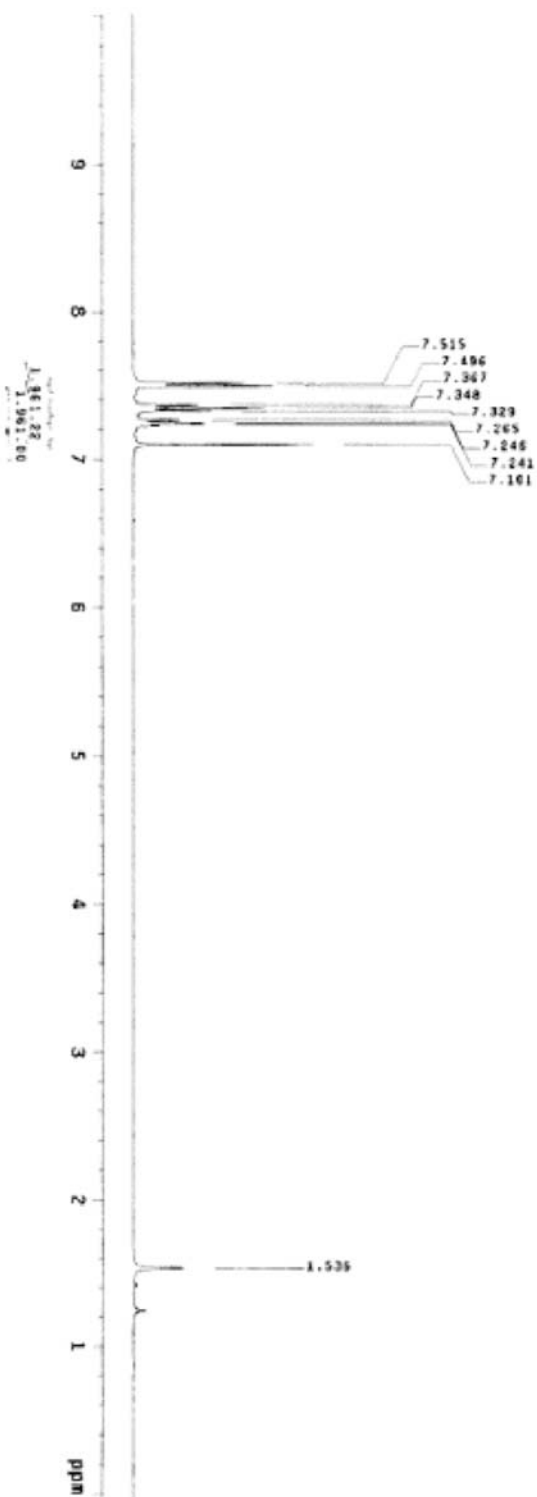

Pheny1-styrenC\_015eP2884  
Archive directory: /mnt/1/sova08/d1/Jung/xyoo/vmr/sys/data  
Sample directory: Pheny1-styrenC\_015eP2884  
File: CARBON  
Pulse Sequence: szpu1

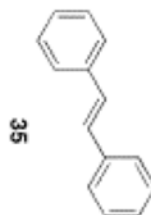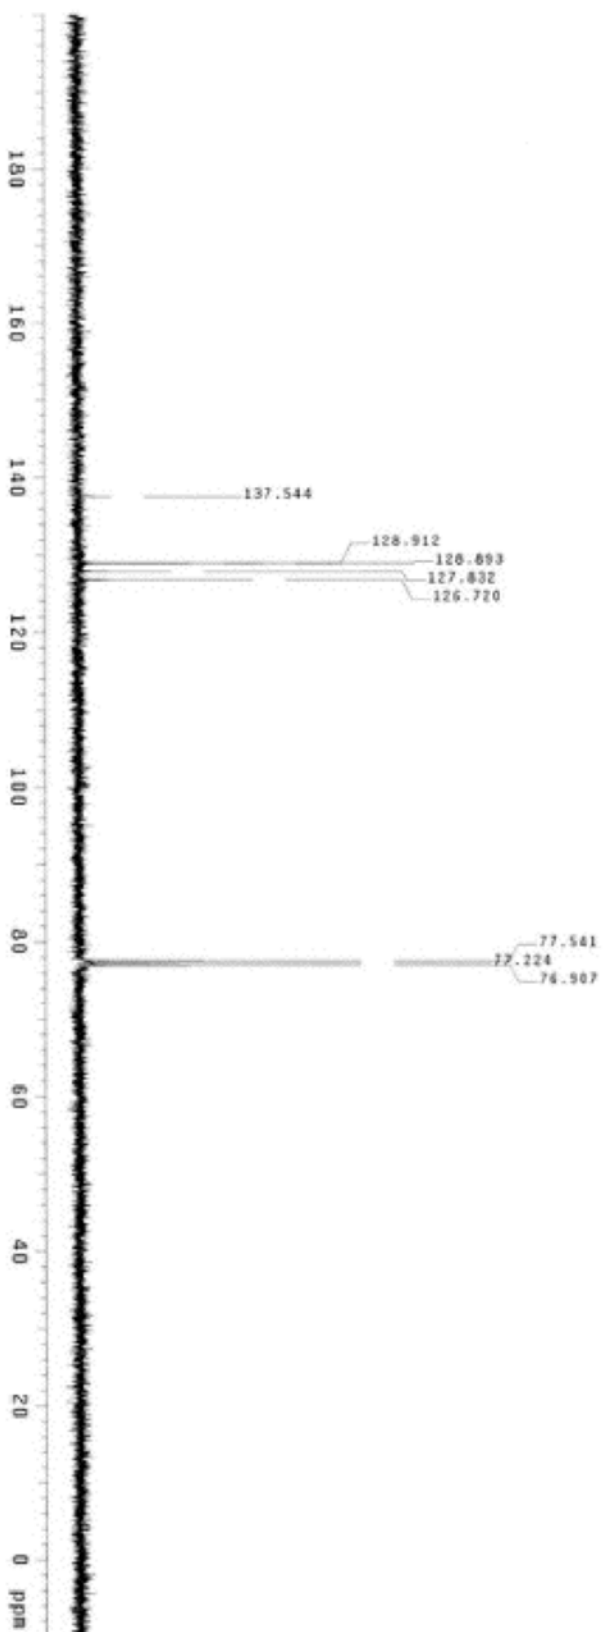

Arvi-acrylCN\_01Sep2014  
Archive directory: /nfs/inova088/d1/jung/yjoo/vmr/sys/data  
Sample directory: /nfs-acrylCN\_01Sep2014  
File: PMOTON  
Pulse Sequence: szpu1

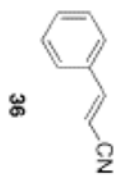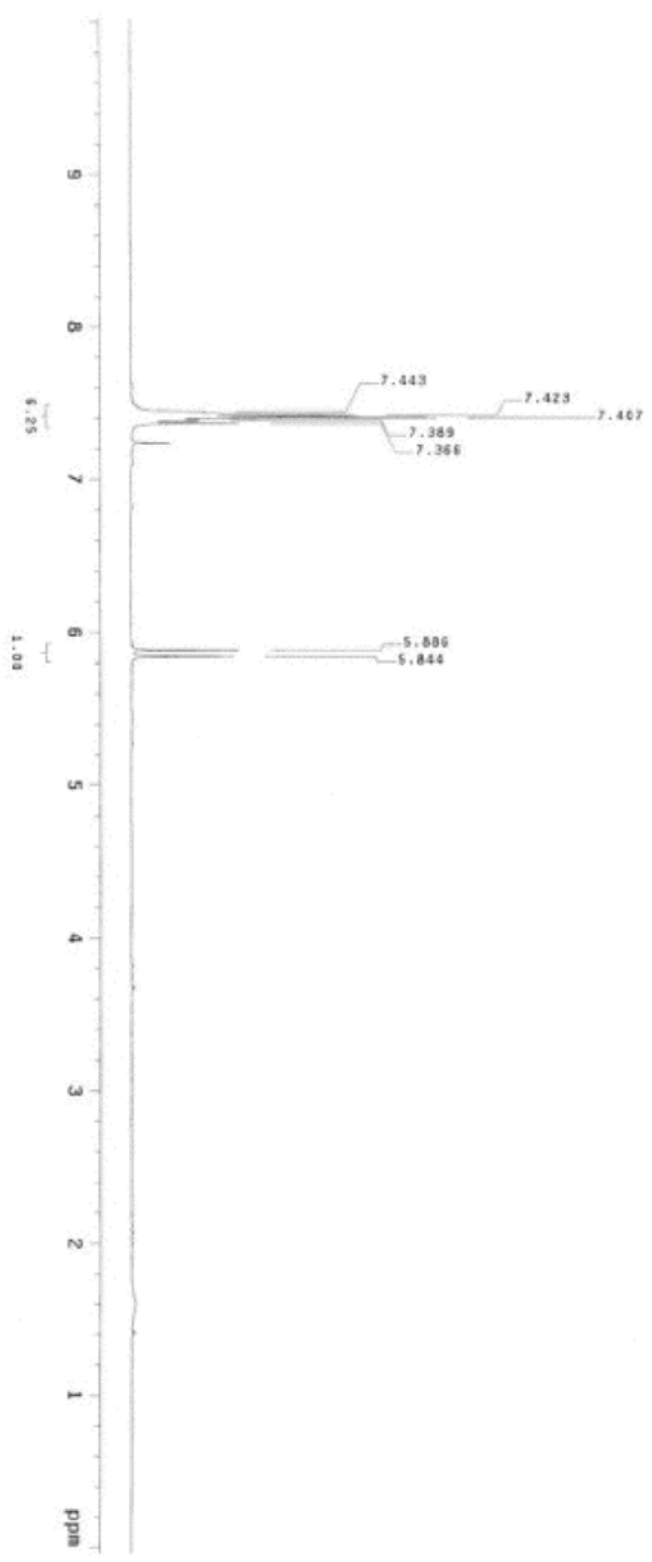

ArY1-acrylCN\_C\_01Sep2004  
Archive directory: /nfs/nova400/d1/jung/kyoo/vnmr/sys/akta  
Sample directory: ArY1-acrylCN\_C\_01Sep2004  
File: CARBON  
Pulse Sequence: zgpg30

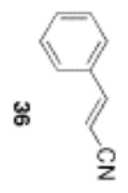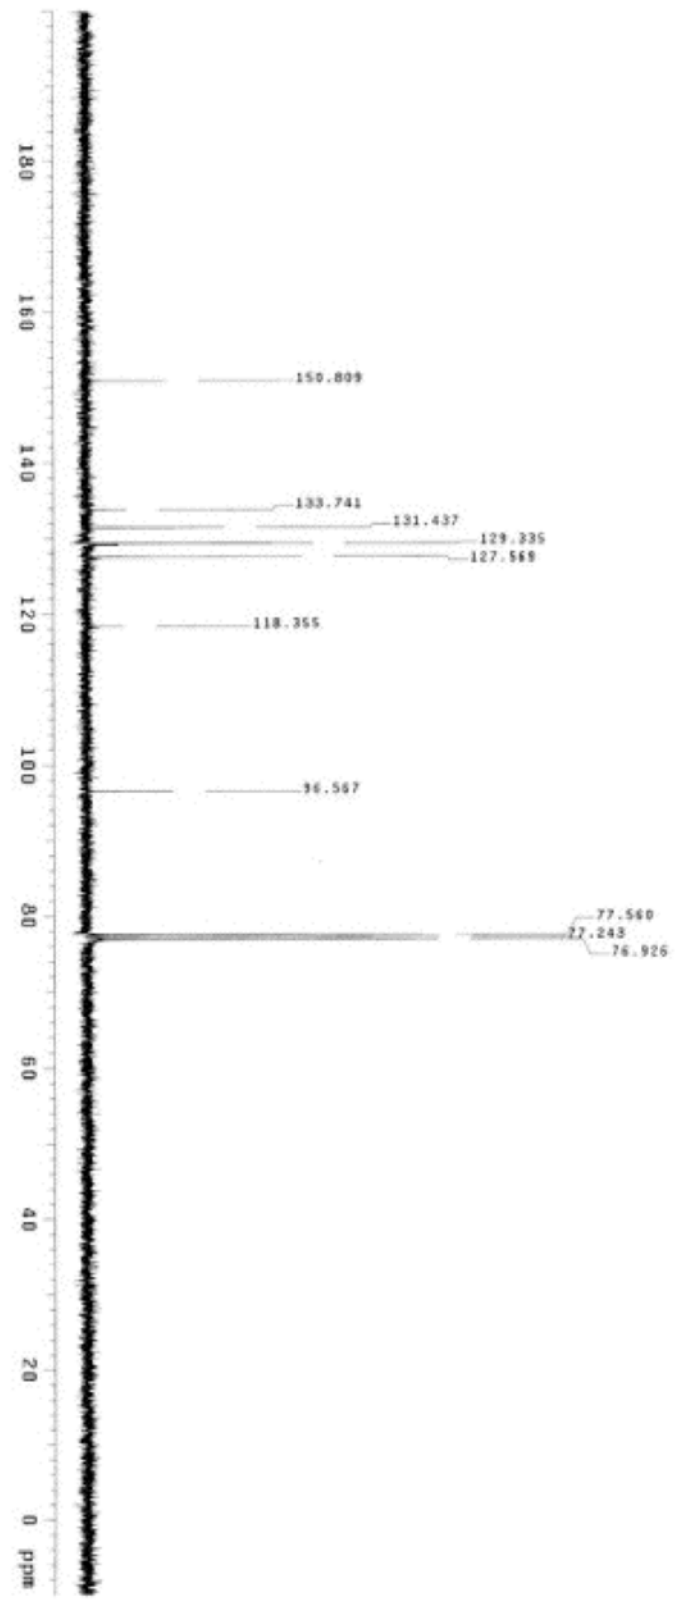

Phenyl-methacrylate\_32sep2004  
 Archive directory: /afs/innovations/jung/kyoo/vmr-sys/data  
 Sample directory: Phenyl-methacrylate\_32sep2004  
 File: proton  
 Pulse sequence: szpu1

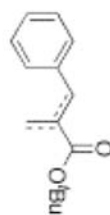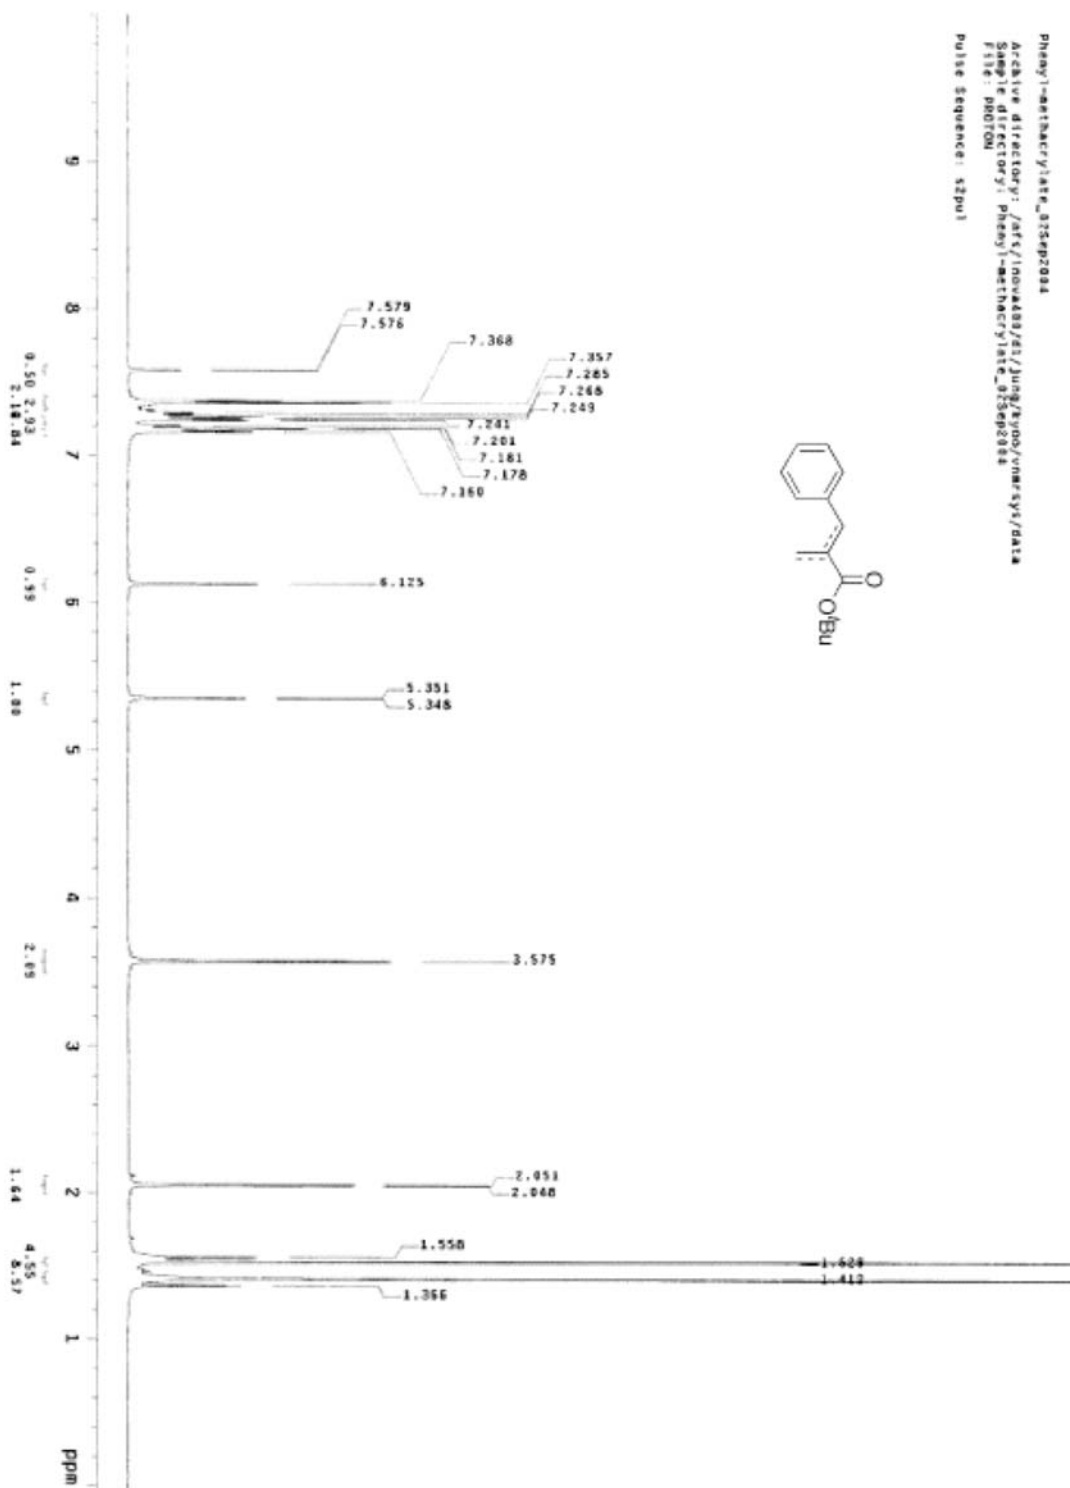

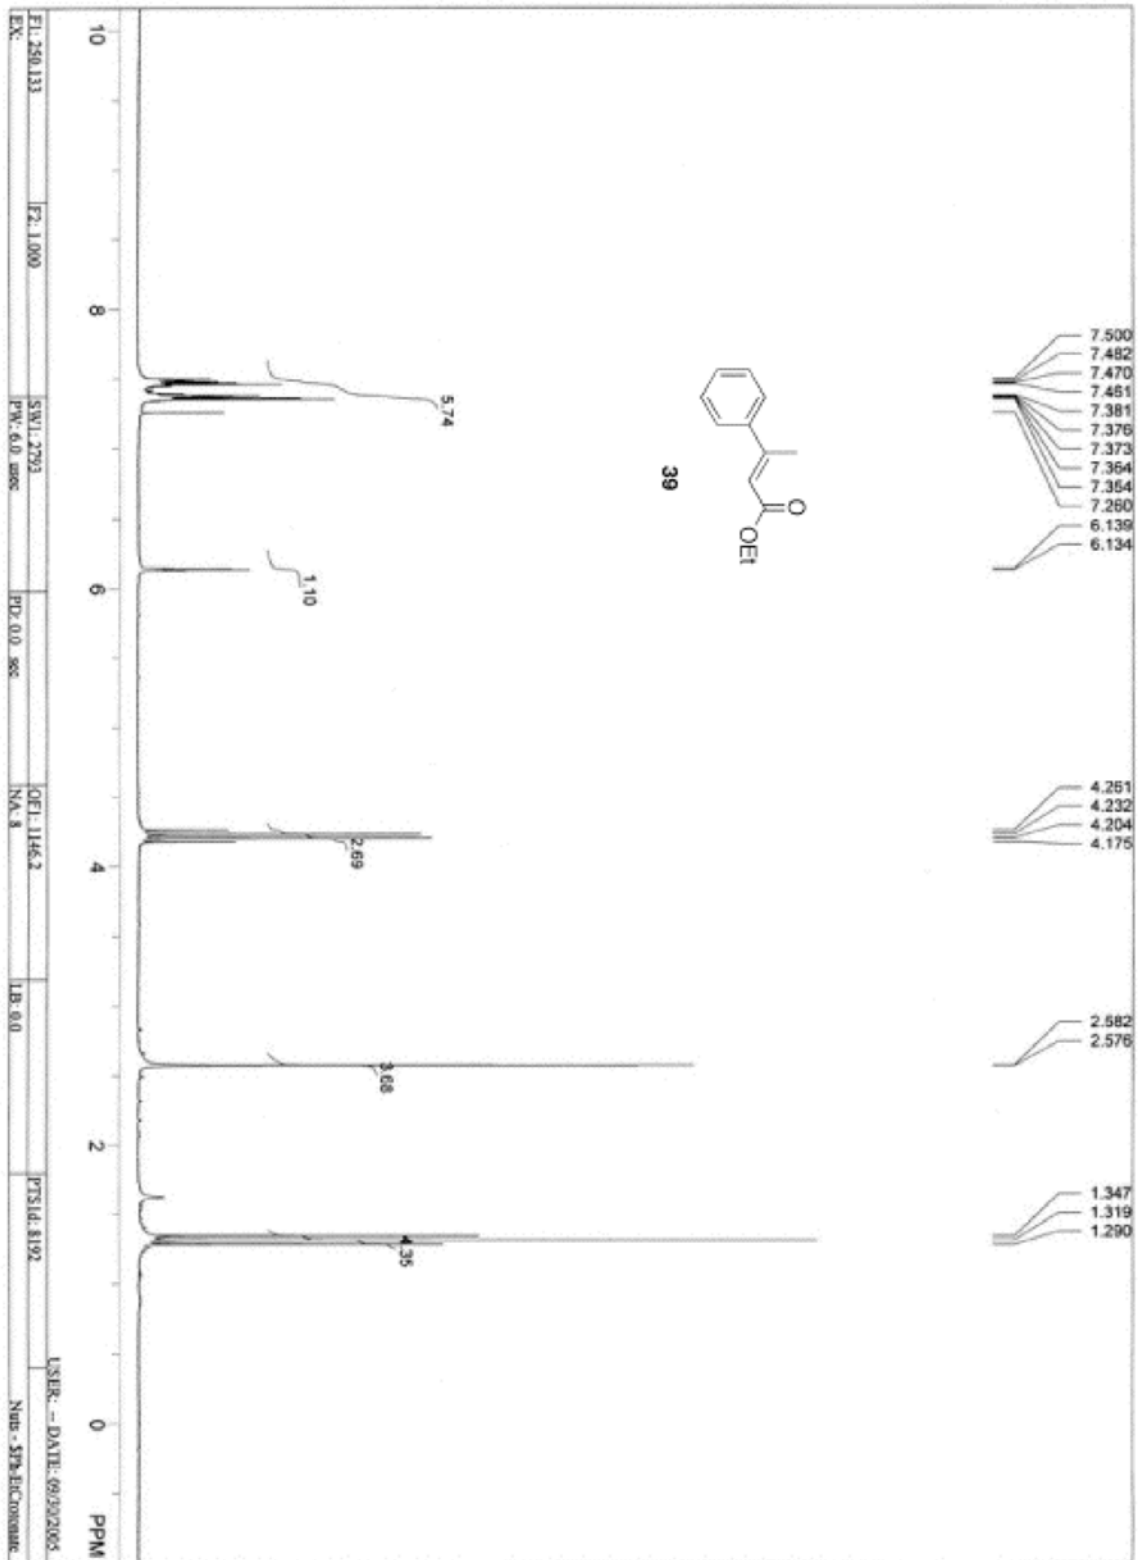



n-dimethylphenylacrylate\_025ep2004  
Archive directory: /afs/150u0002/01/11u00/ru00/vnmr/sus/Date  
Sample directory: n-dimethylphenylacrylate\_025ep2004  
File: n020M  
Pulse sequence: szpu1

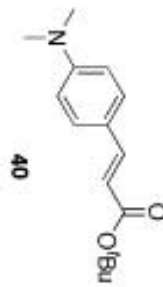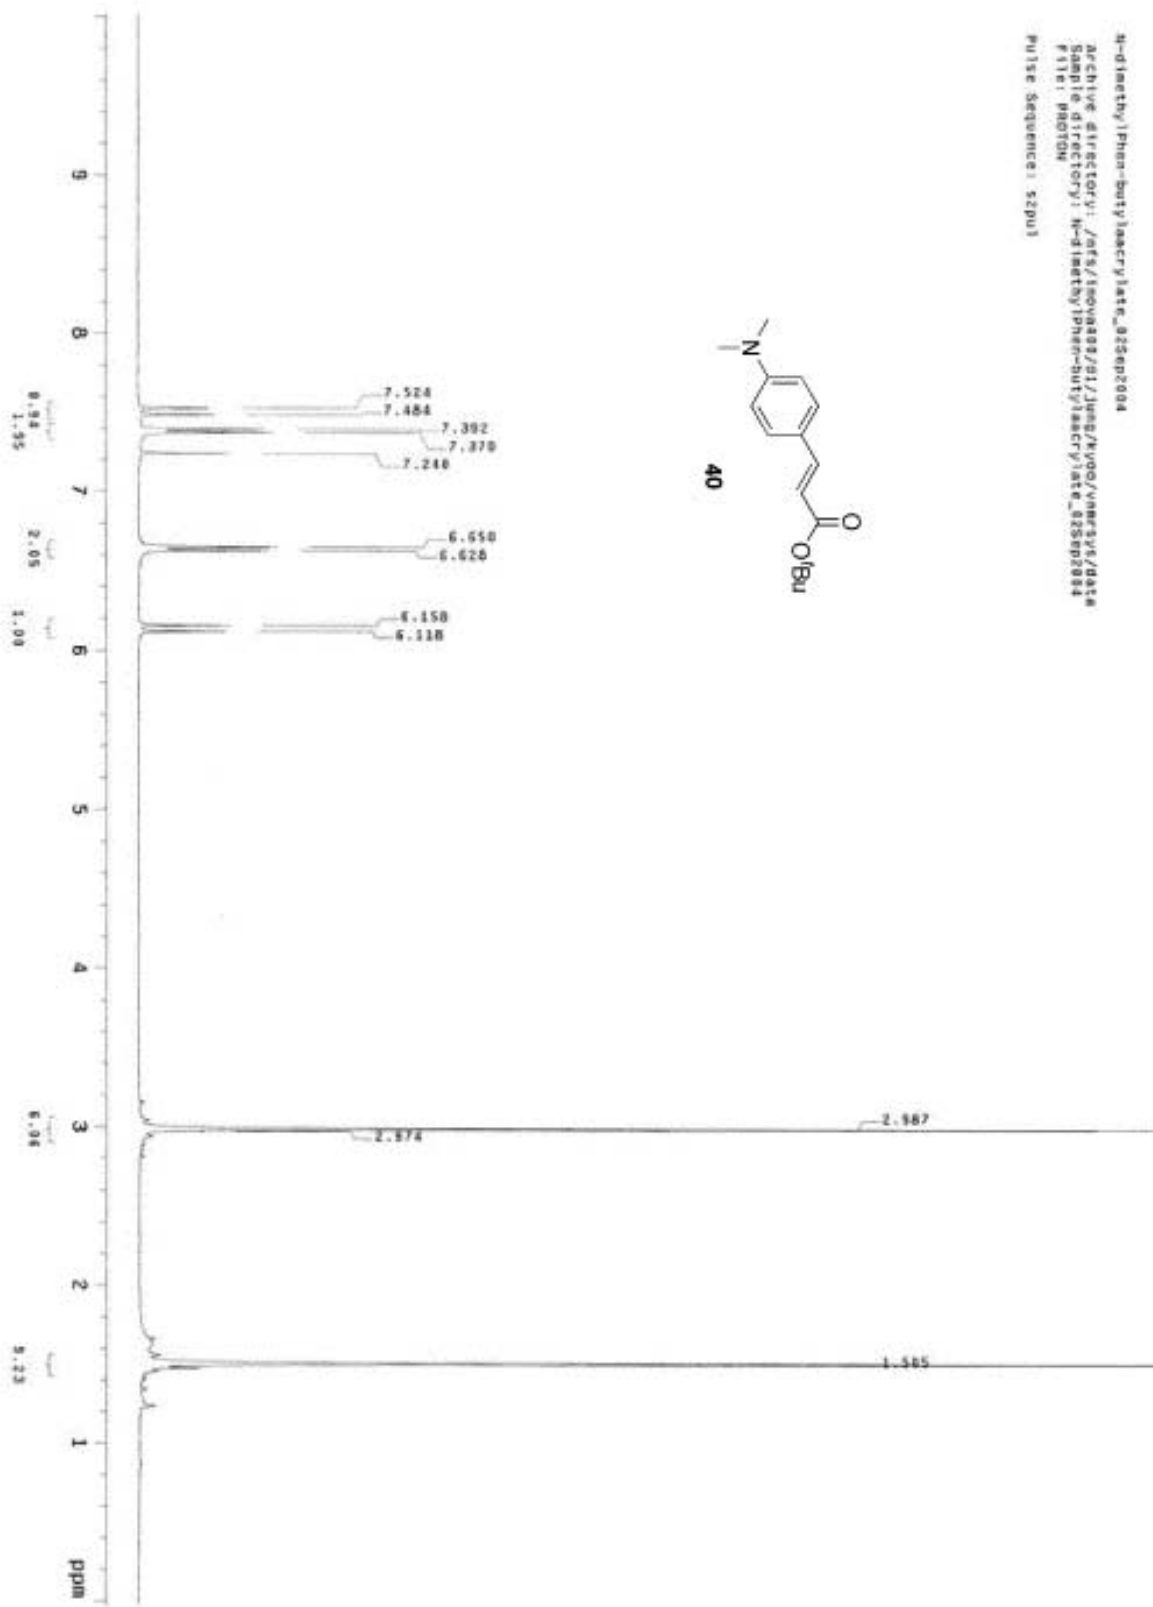



N-methoxyphen-butylacryl\_0250p100  
Archive directory: /nfs/lnovate01/d1/luog/luog/umartyz/data  
Sample directory: N-methoxyphen-butylacryl\_0250p100  
File: CARBON  
Pulse Sequence: s2pu1

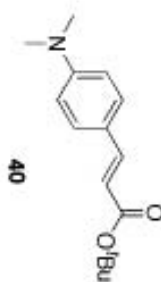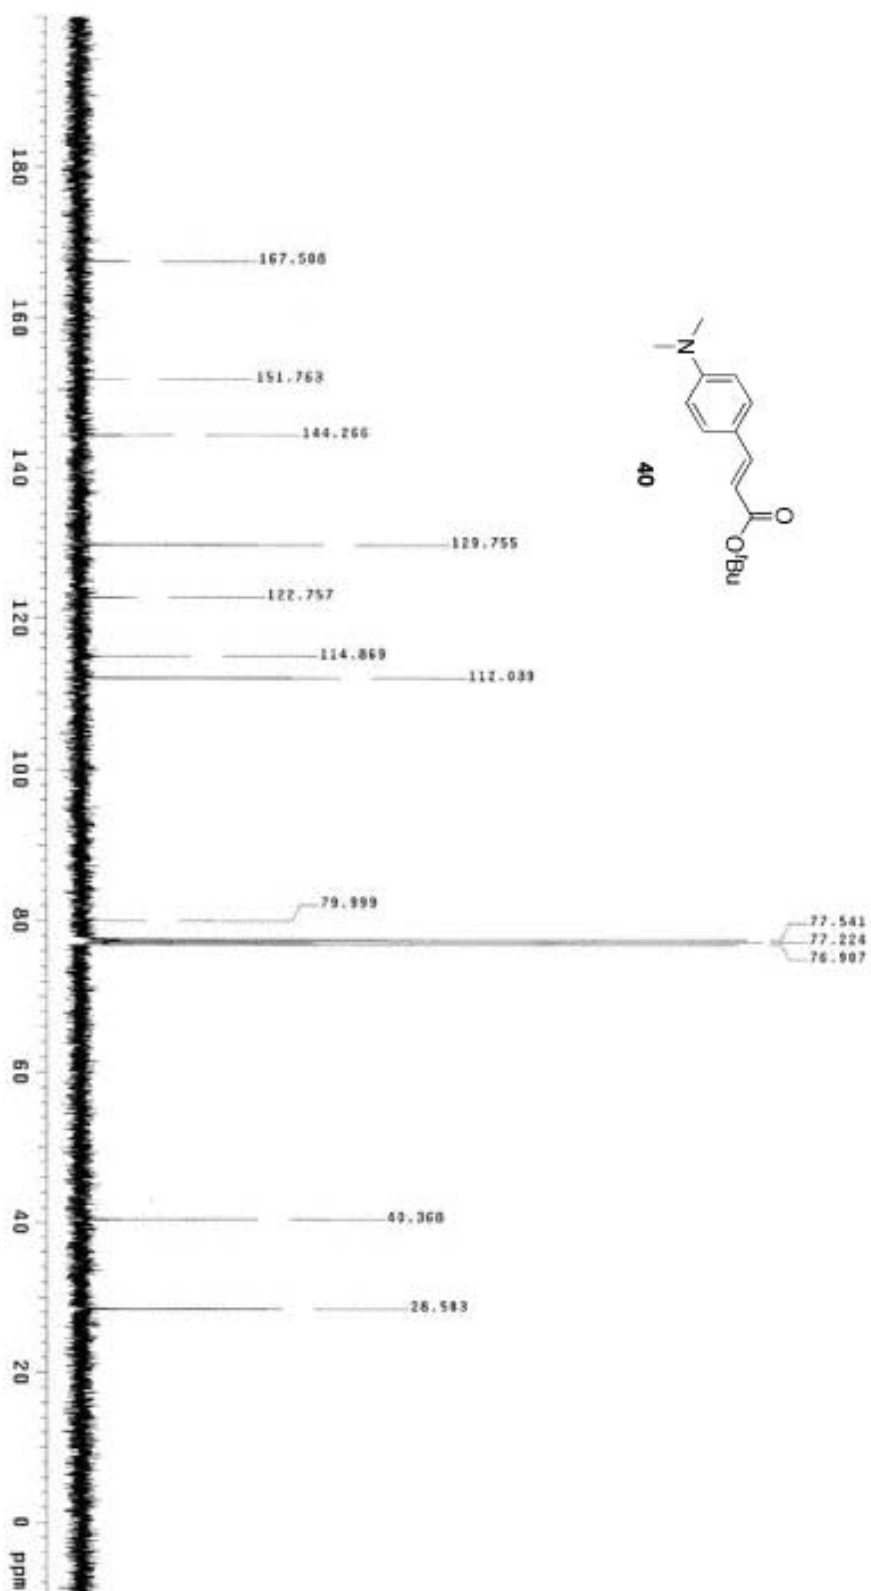

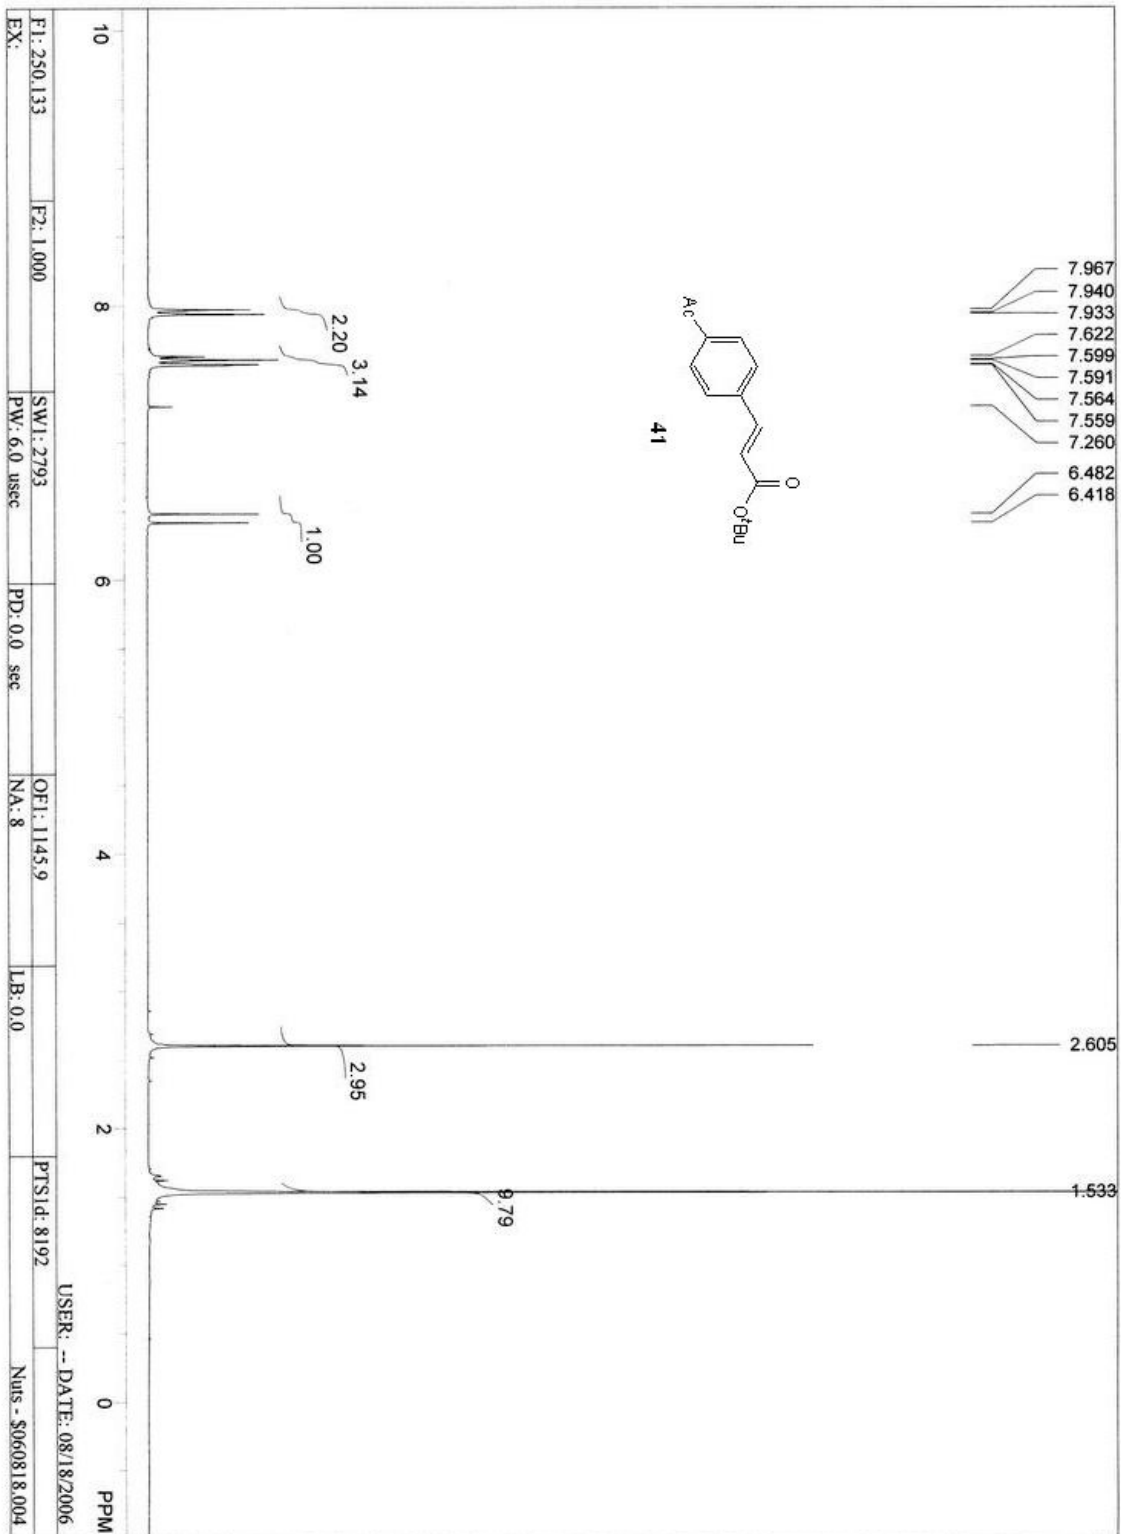

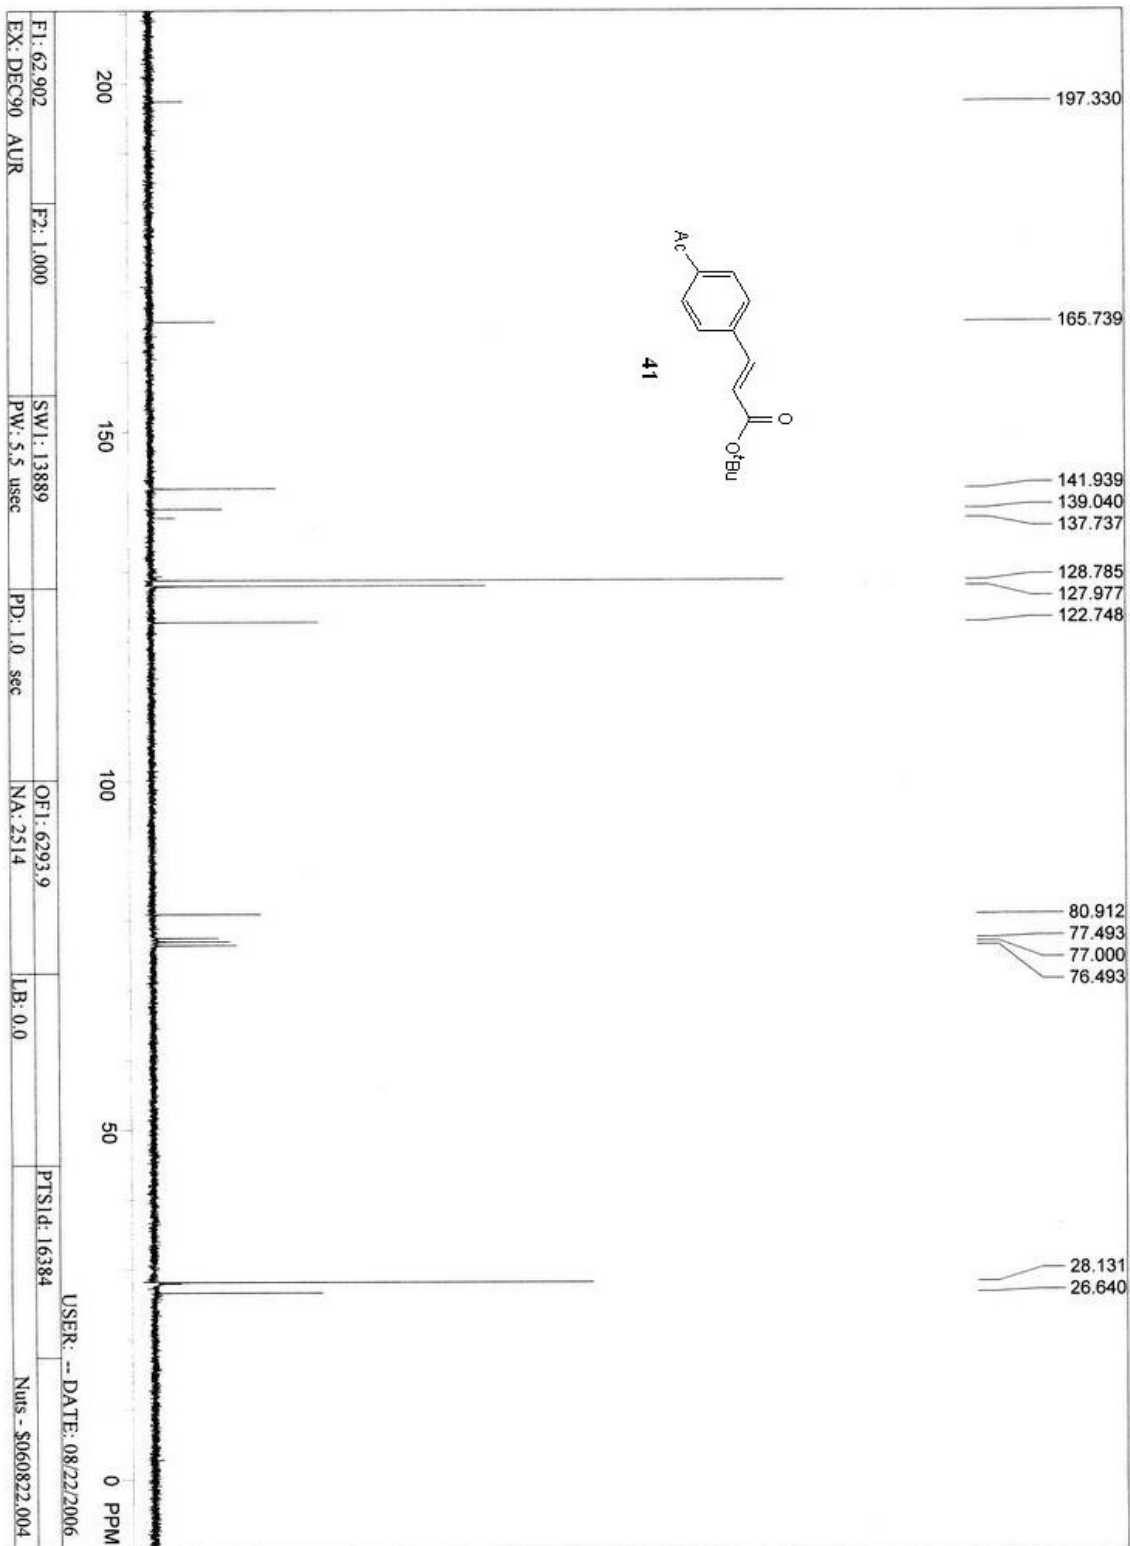

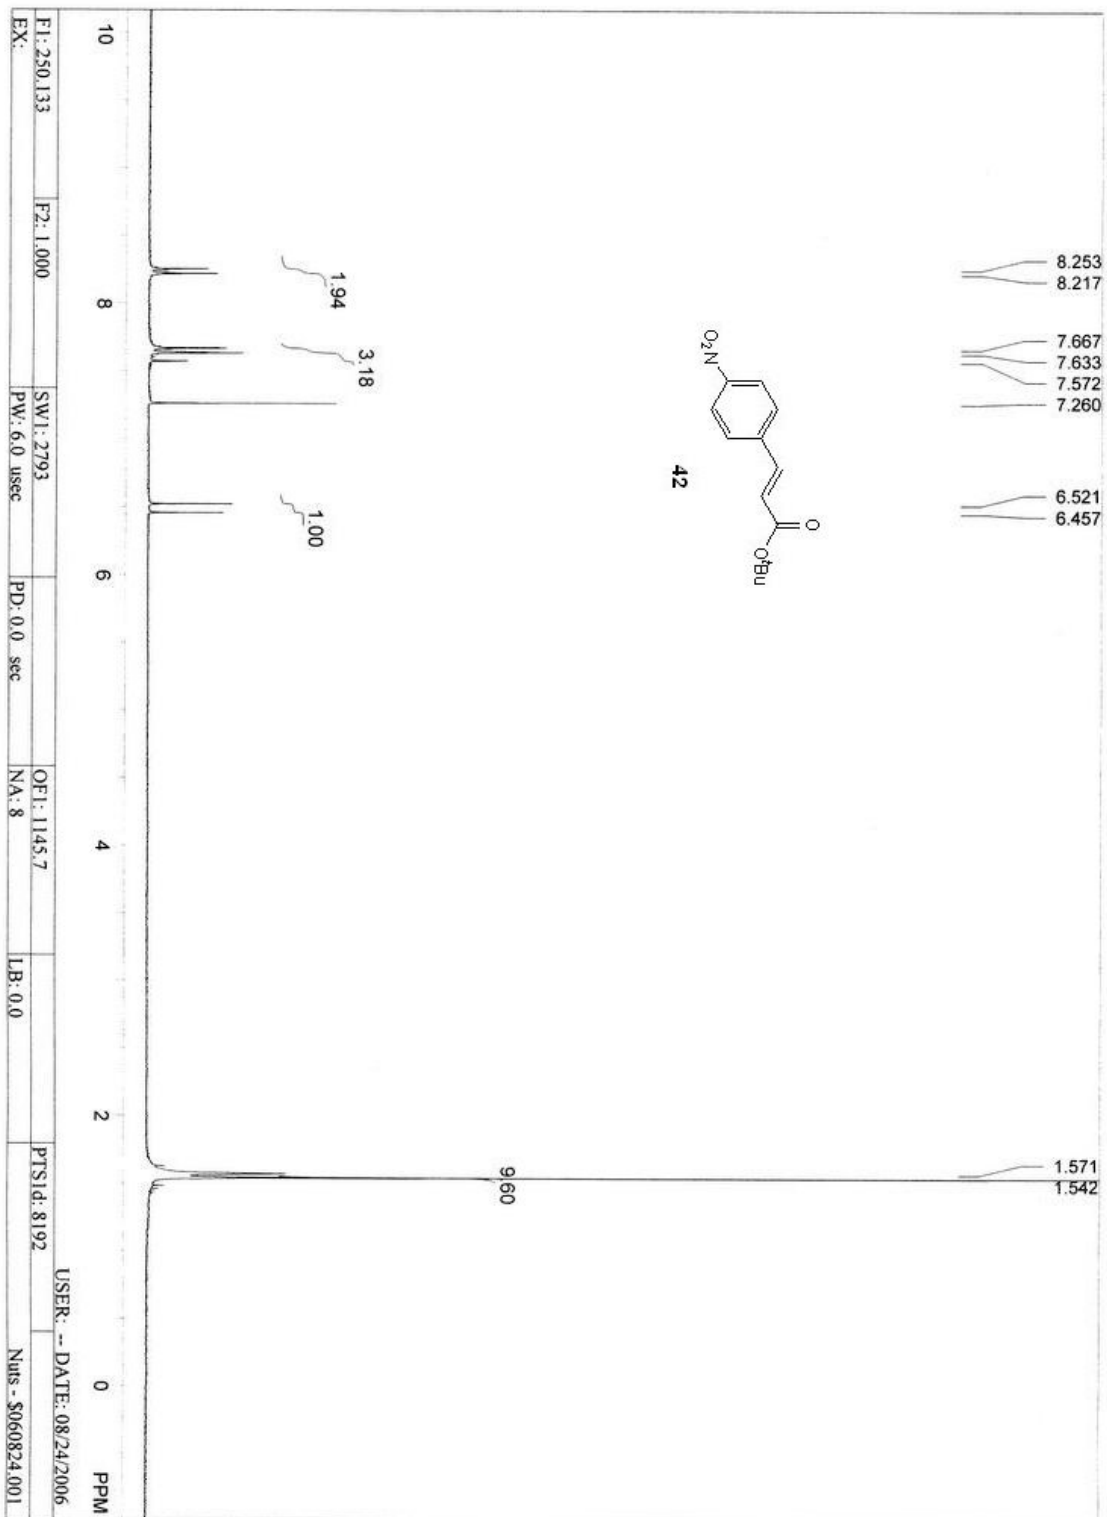

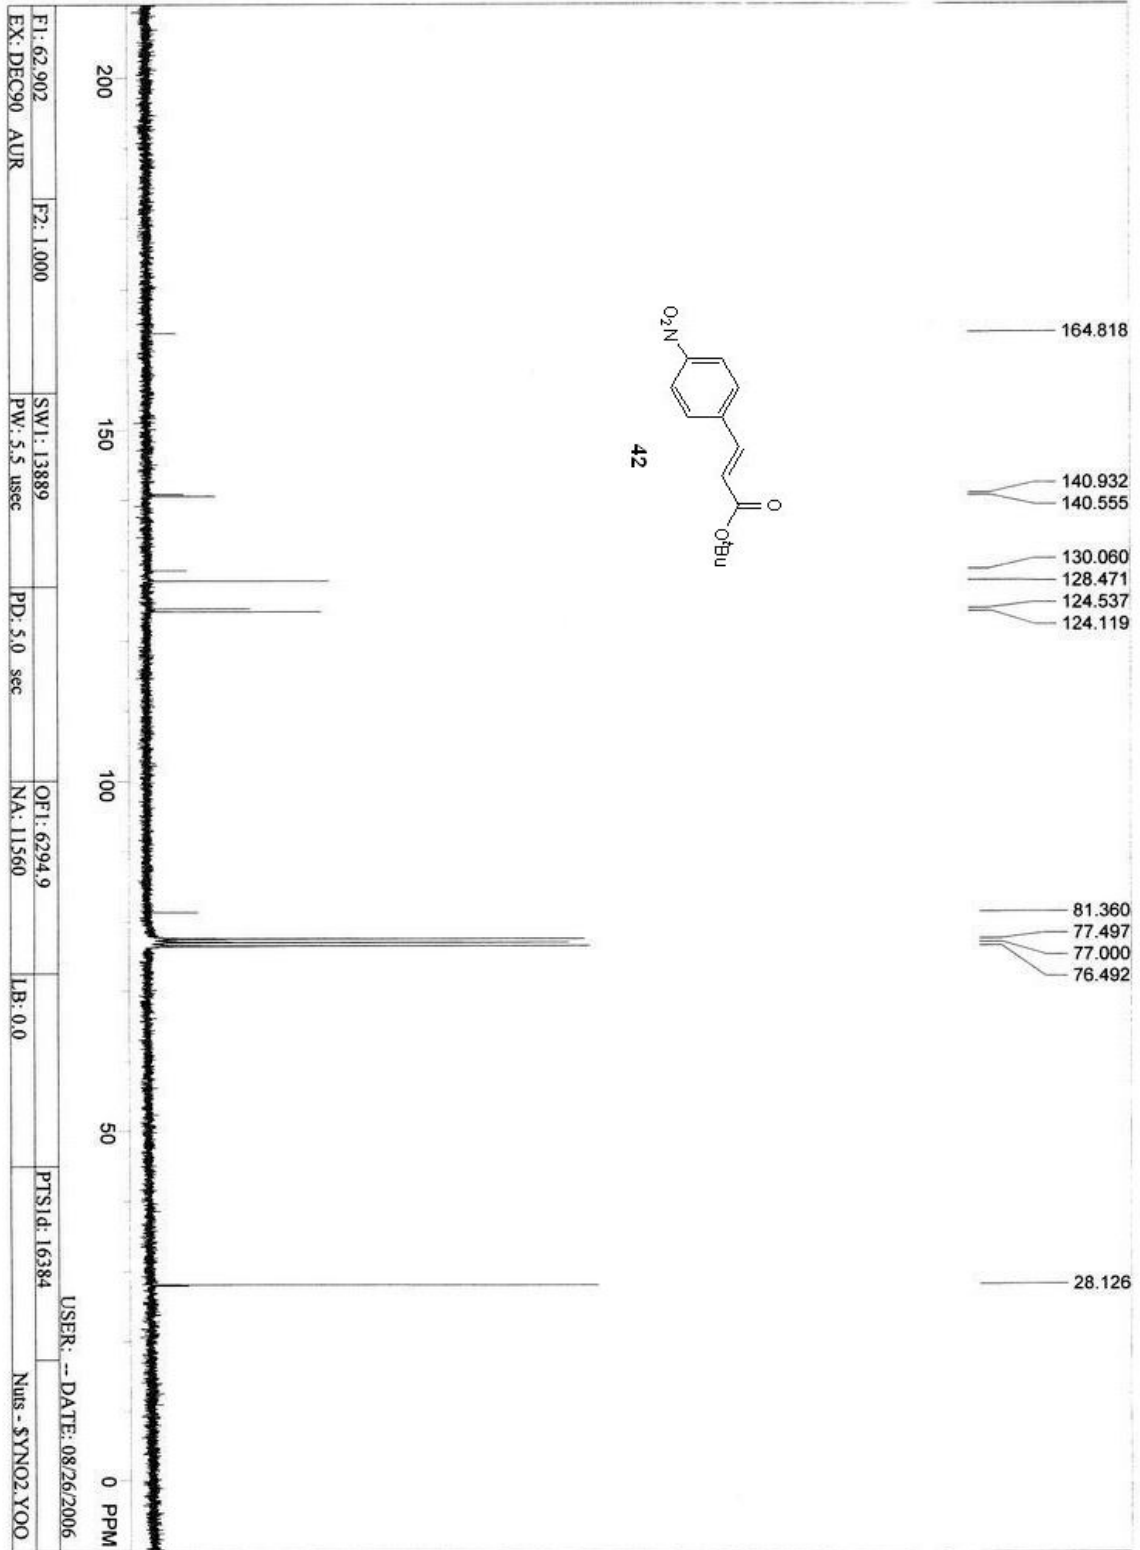

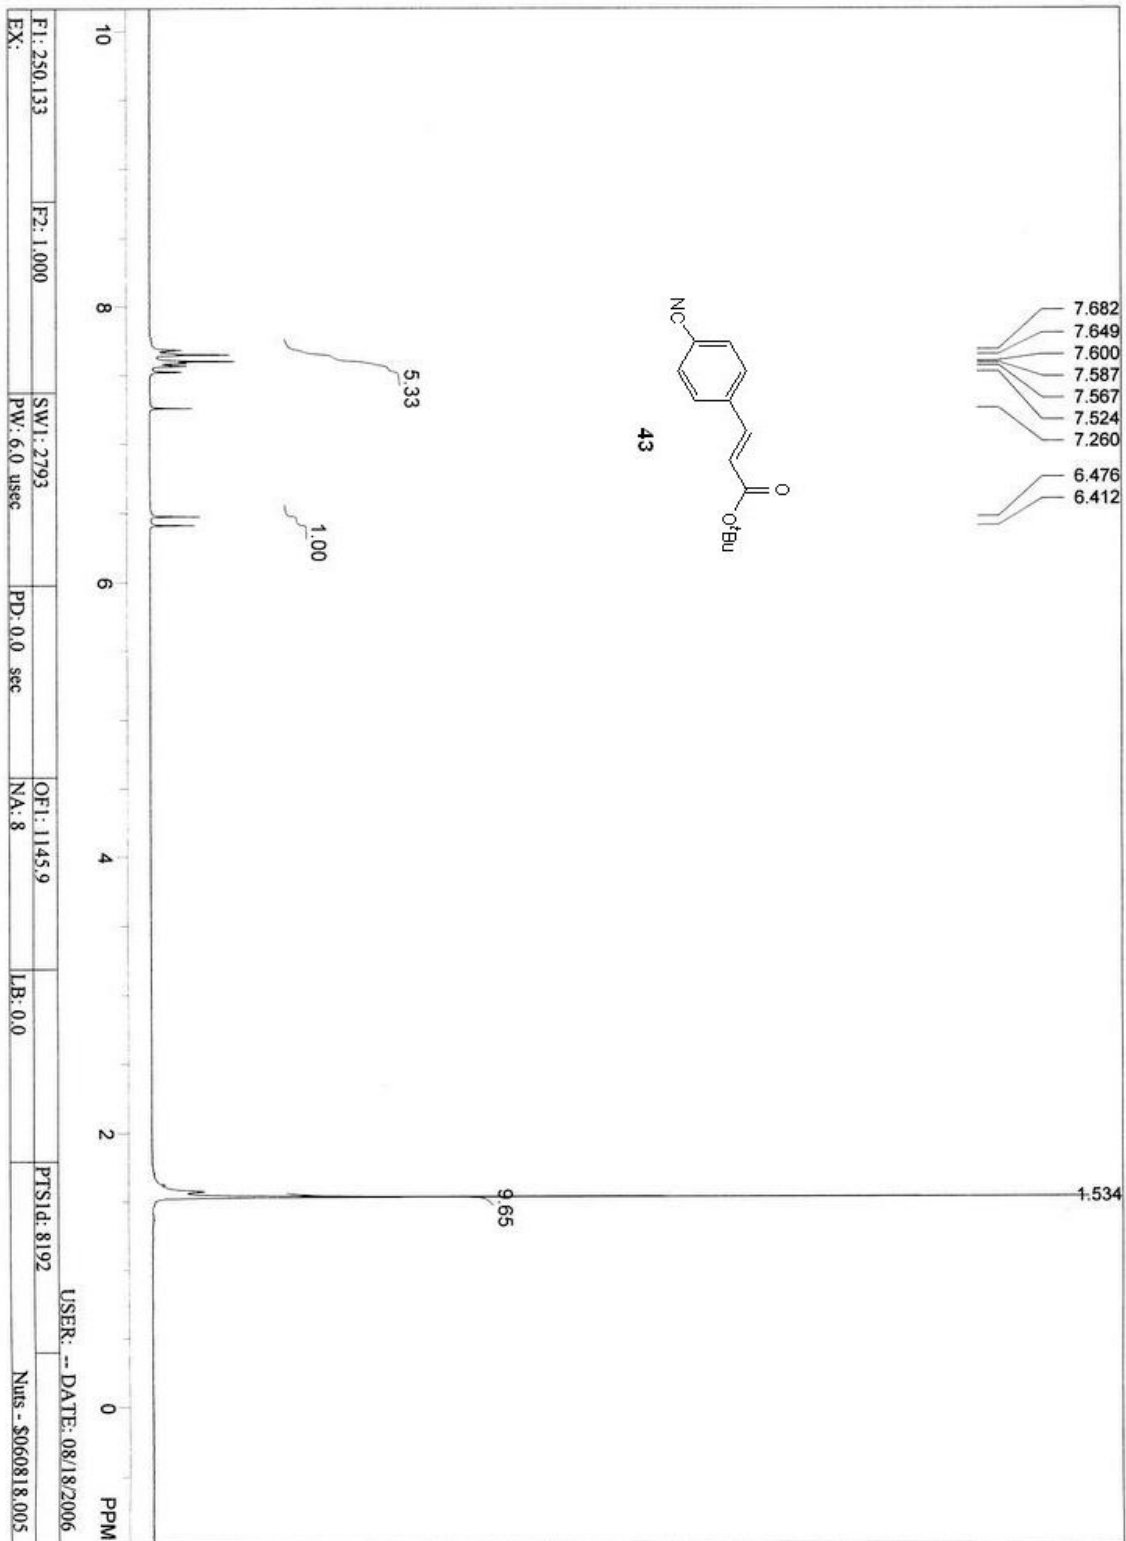

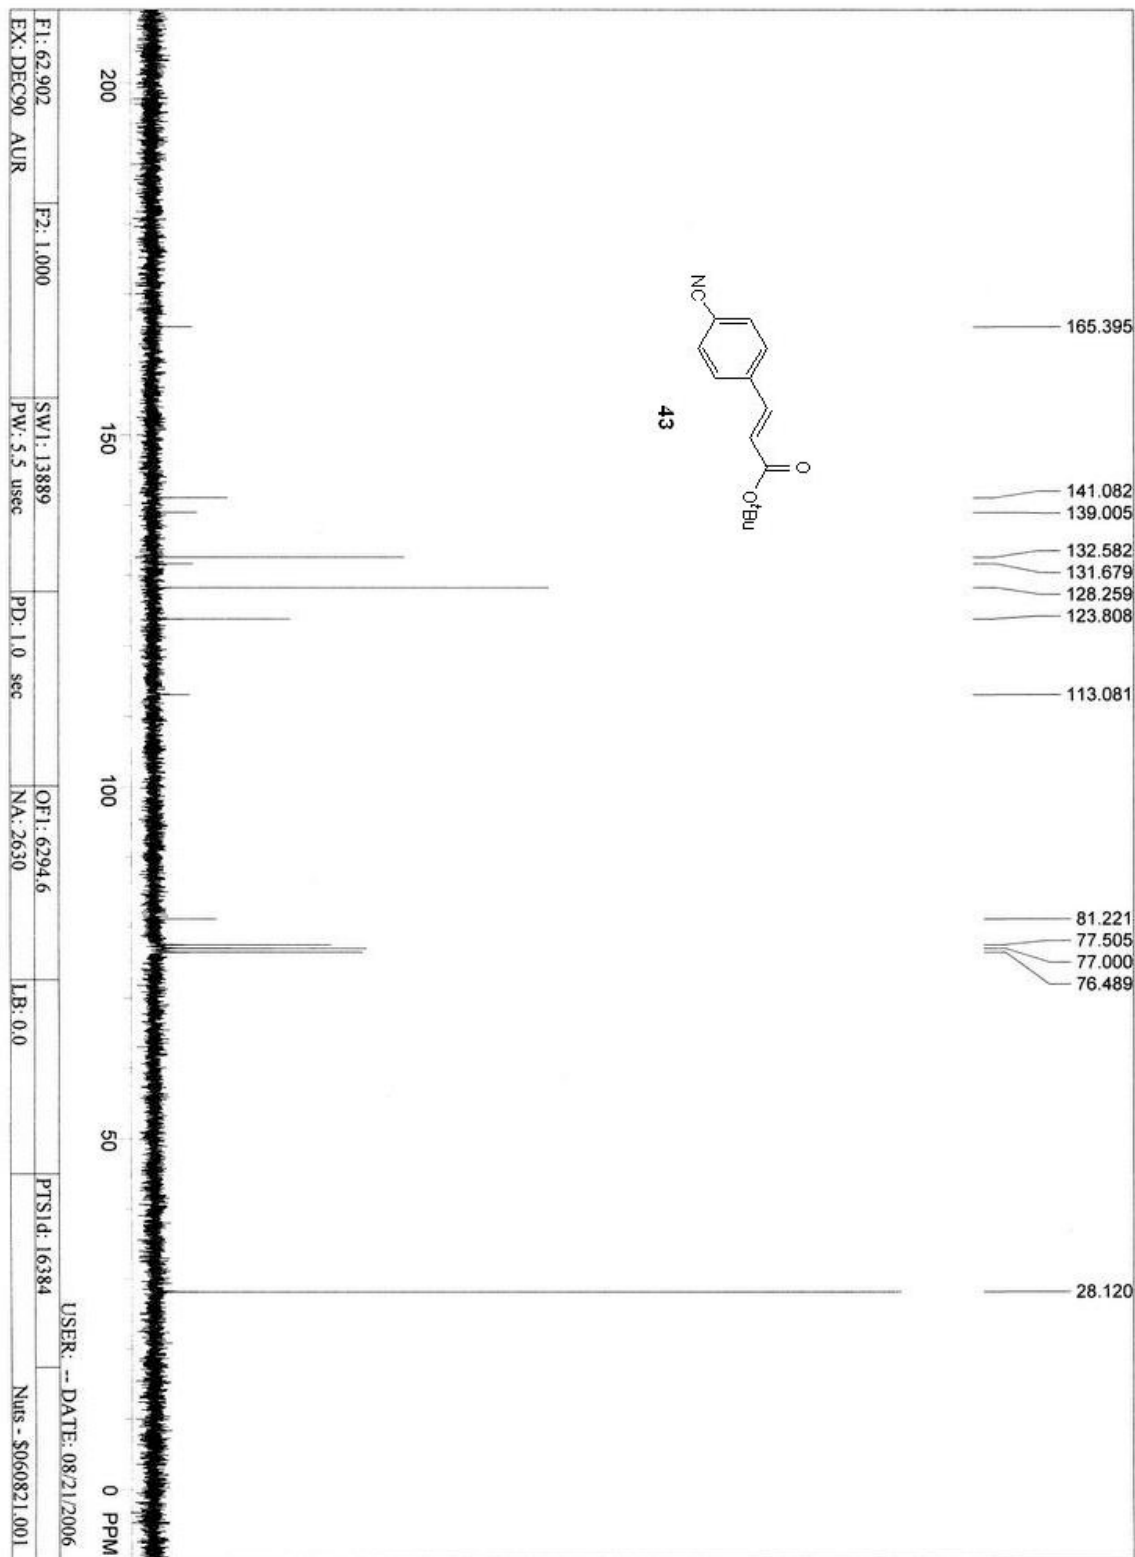

toluyl-butylacrylate\_01sep2004  
 Atch'ac Director: /rfd/inovak80/d1/jung/kyoo/wwr-sys/data  
 Sample directory: toluyl-butylacrylate\_01sep2004  
 File: P80104  
 Pulse sequence: zgpg1

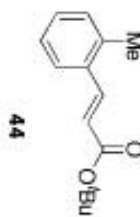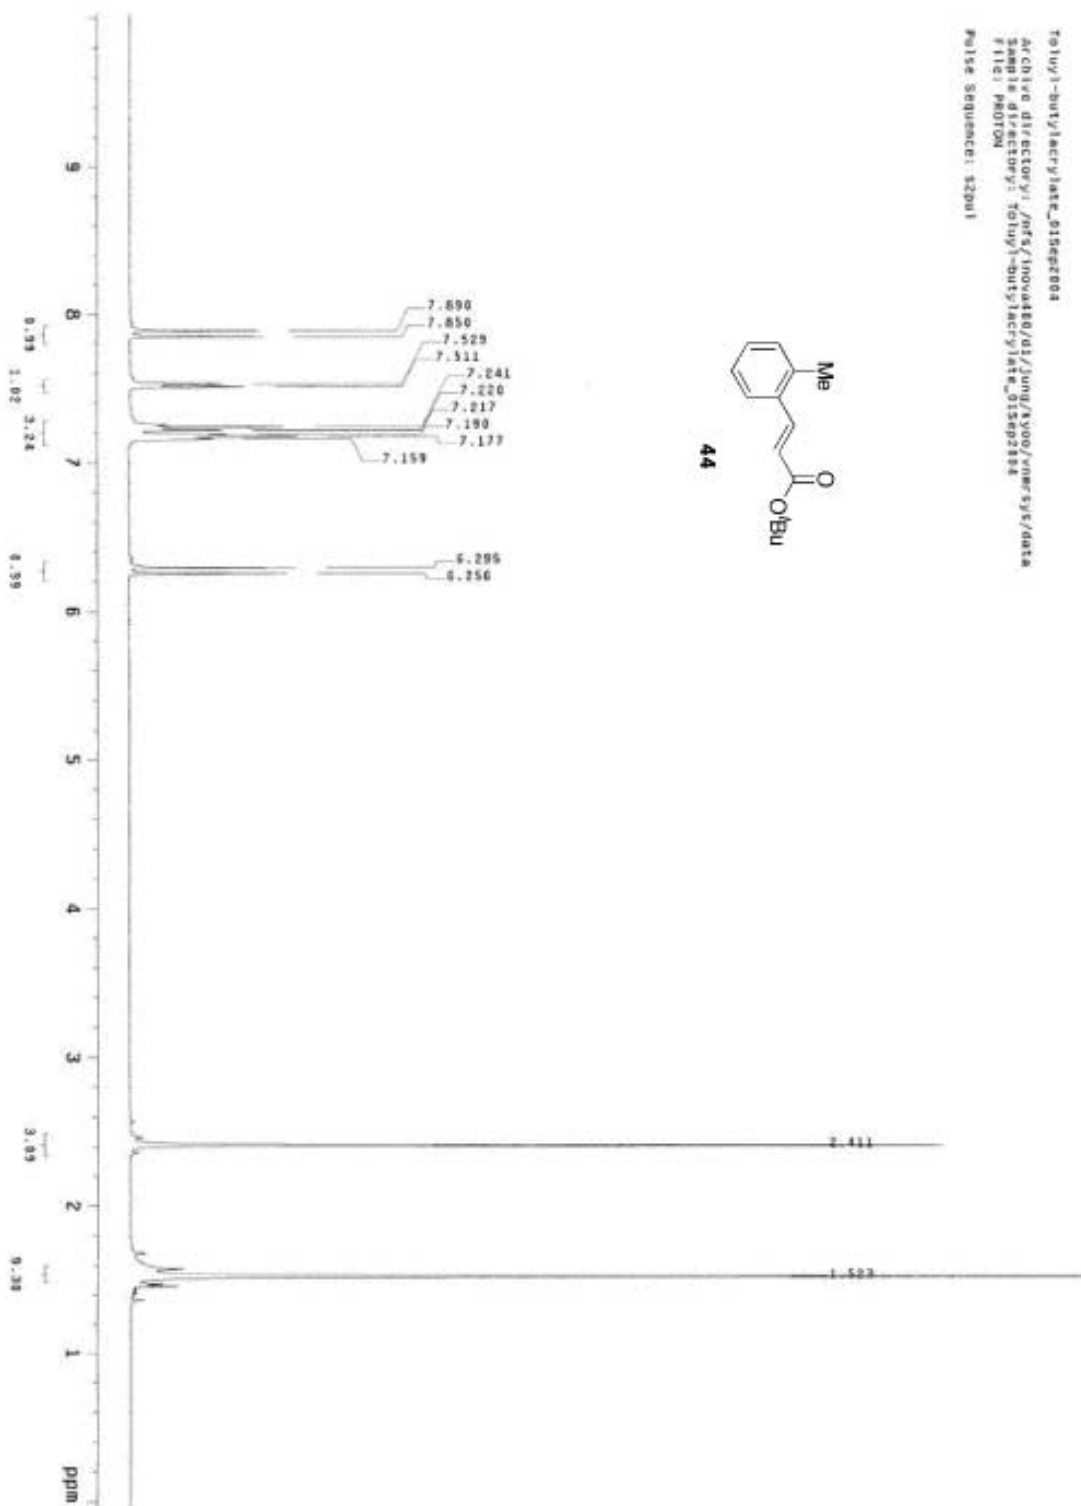



Toluyl-butylacrylate\_C\_01sep2004  
Archive directory: /nfs/innovate00/d1/jung/kyoo/vmr/tvs/data  
Sample directory: Toluyl-butylacrylate\_C\_01sep2004  
File: CARBON  
Pulse Sequence: szpu1

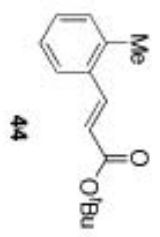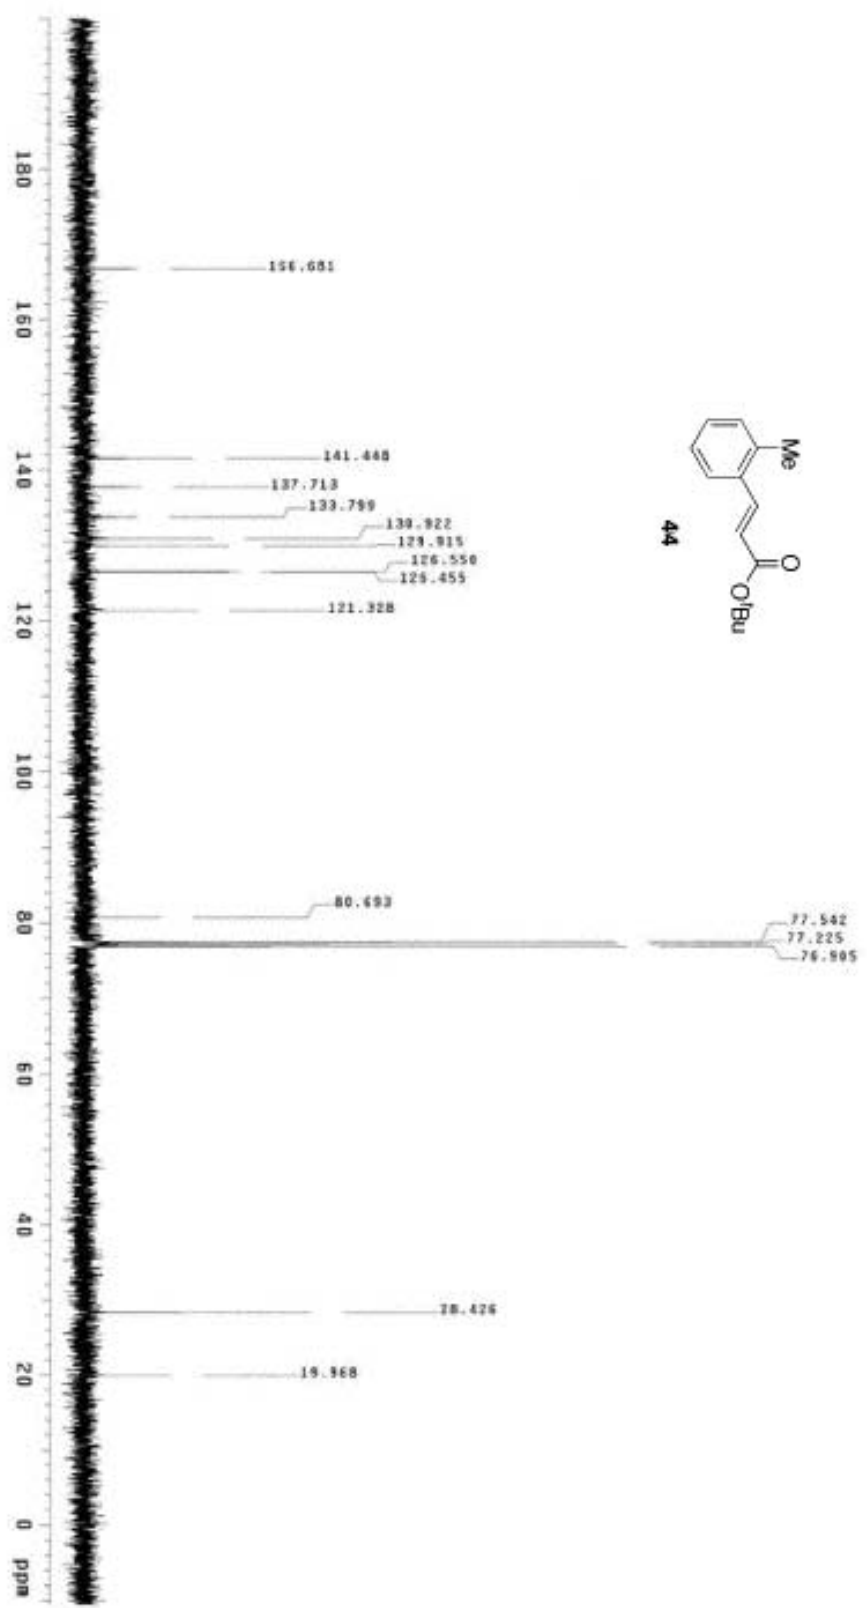

3-Indol-3-ylbutylacrylate\_15Sep2004  
Archive directory: /afs/innovate/dl/jung/kyoo/ymw/sy/4data  
Sample directory: 3-Indol-3-ylbutylacrylate\_15Sep2004  
File: PROTON  
Pulse Sequence: zgpg30

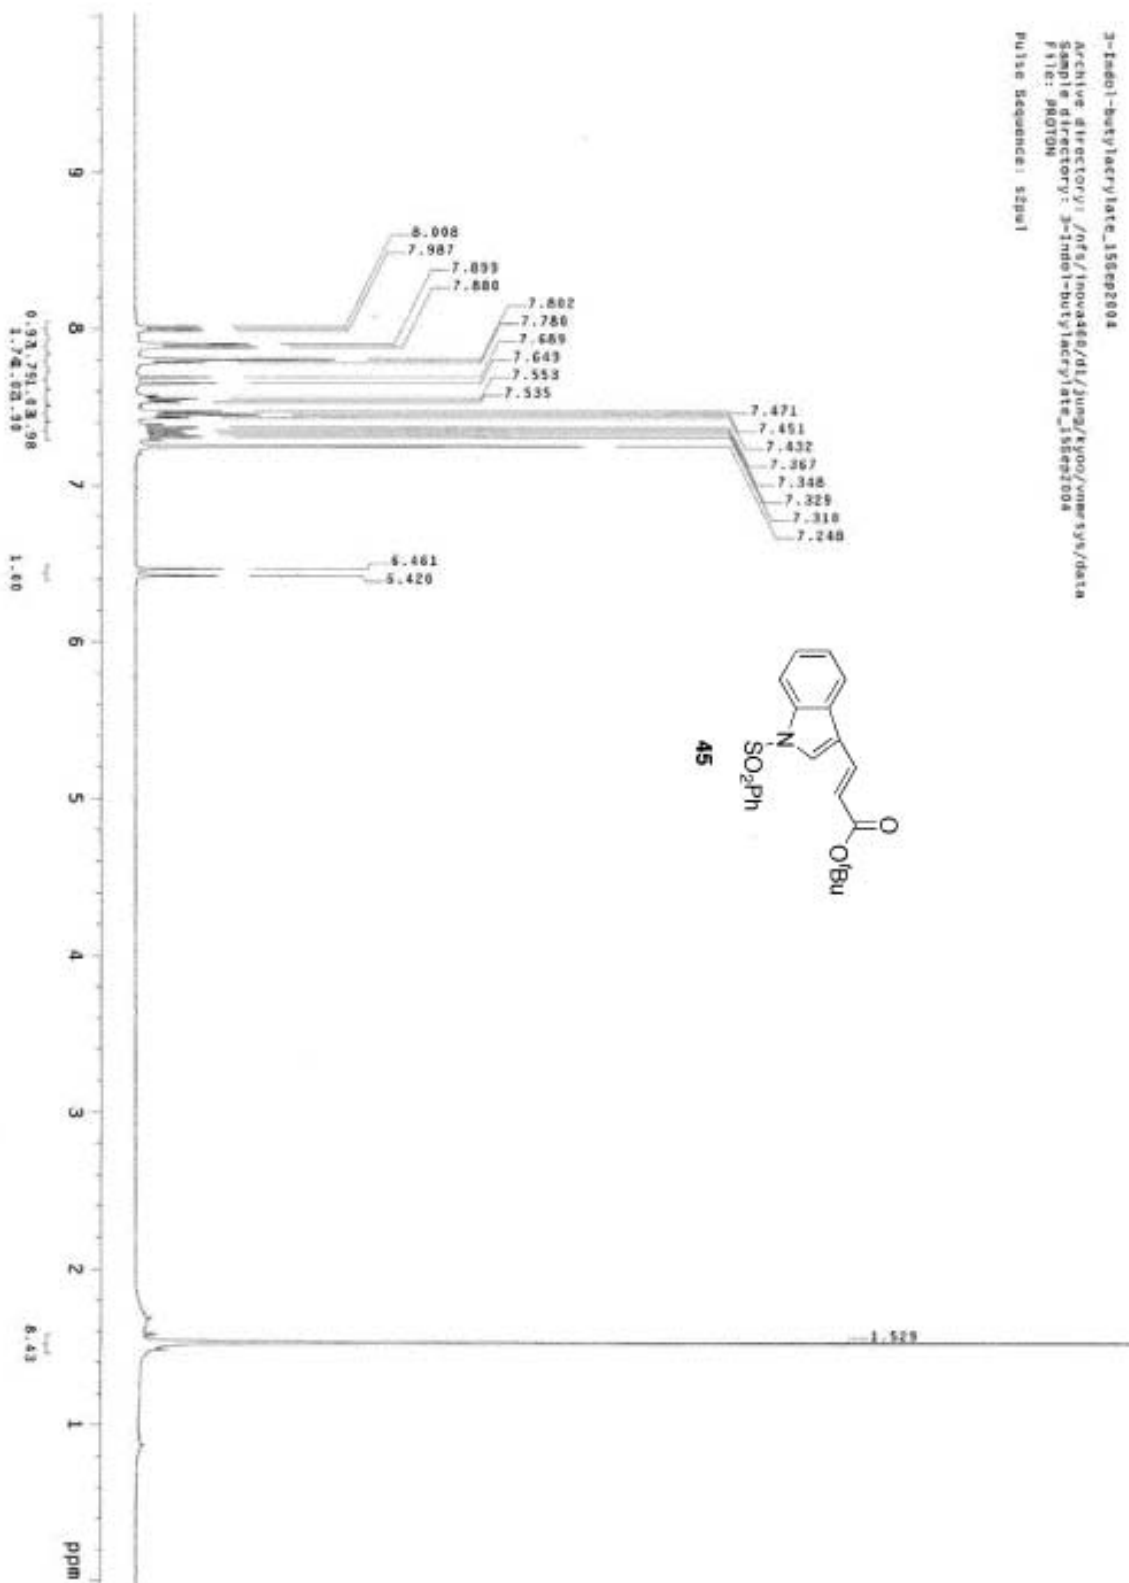

Z-Indol-3-butylacrylate\_15Sep2004  
 Archive directory: /nfs/soovass/d1/jung/kyoo/veer/sys/data  
 Sample directory: Z-INDOL-BUTYLACRYLATE\_15SEP2004  
 File: PROTON  
 Pulse Sequence: zgpg30

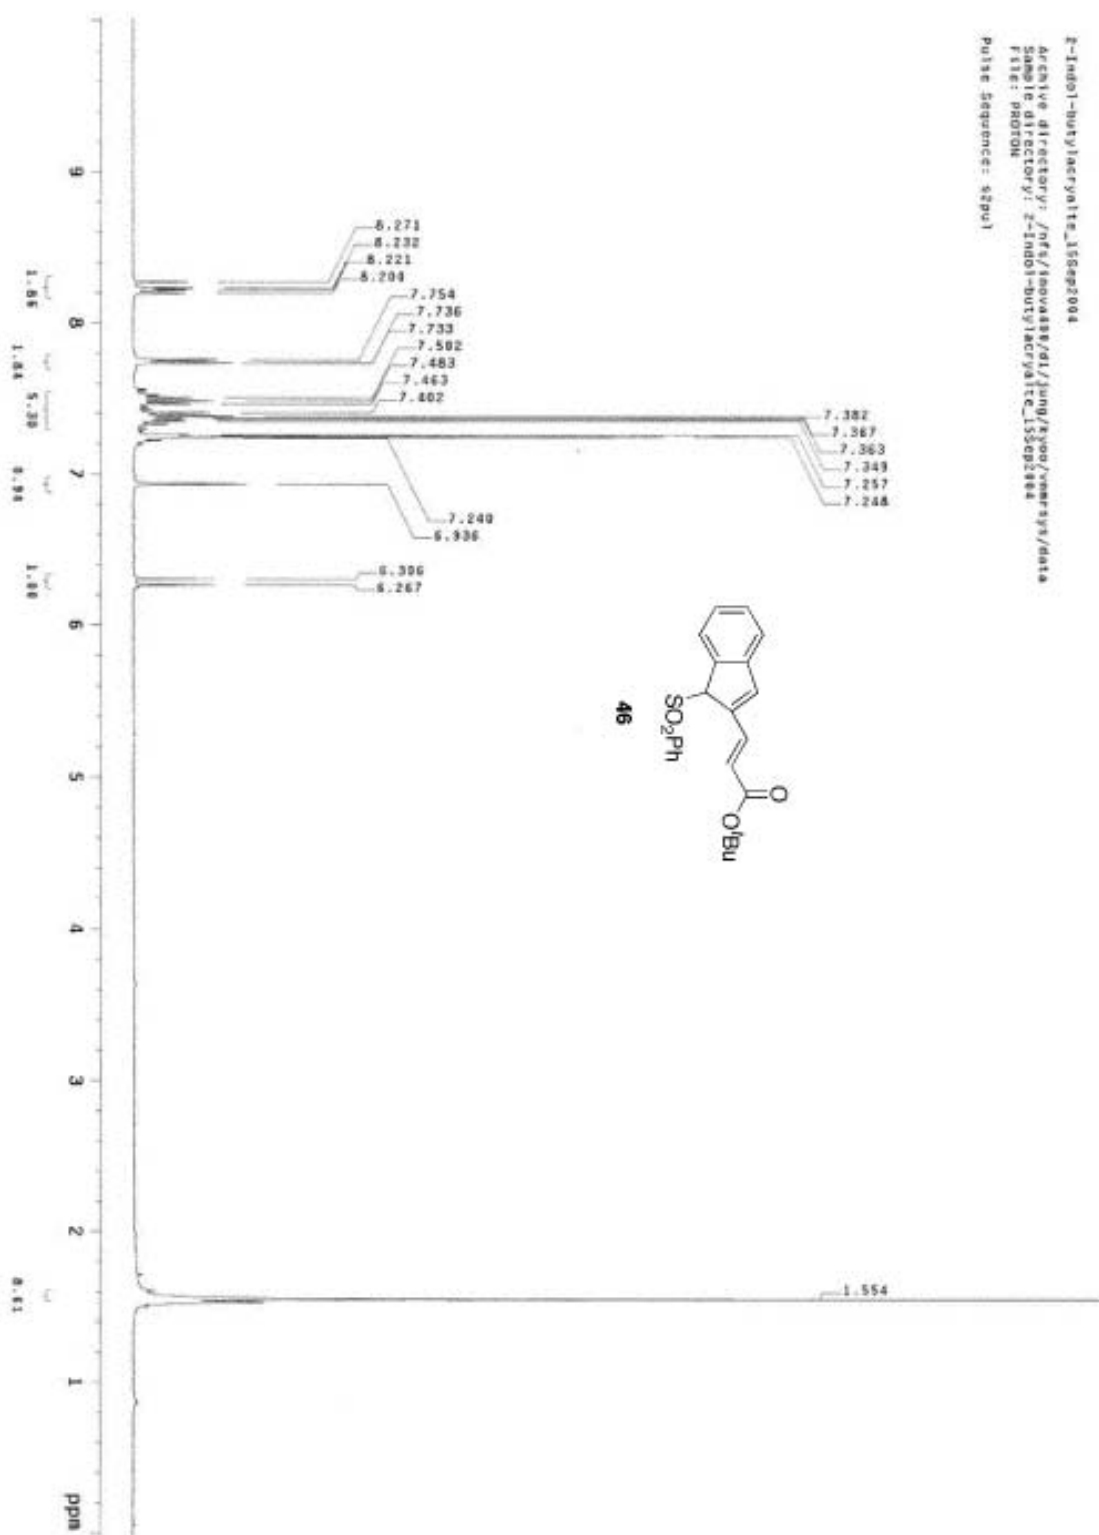

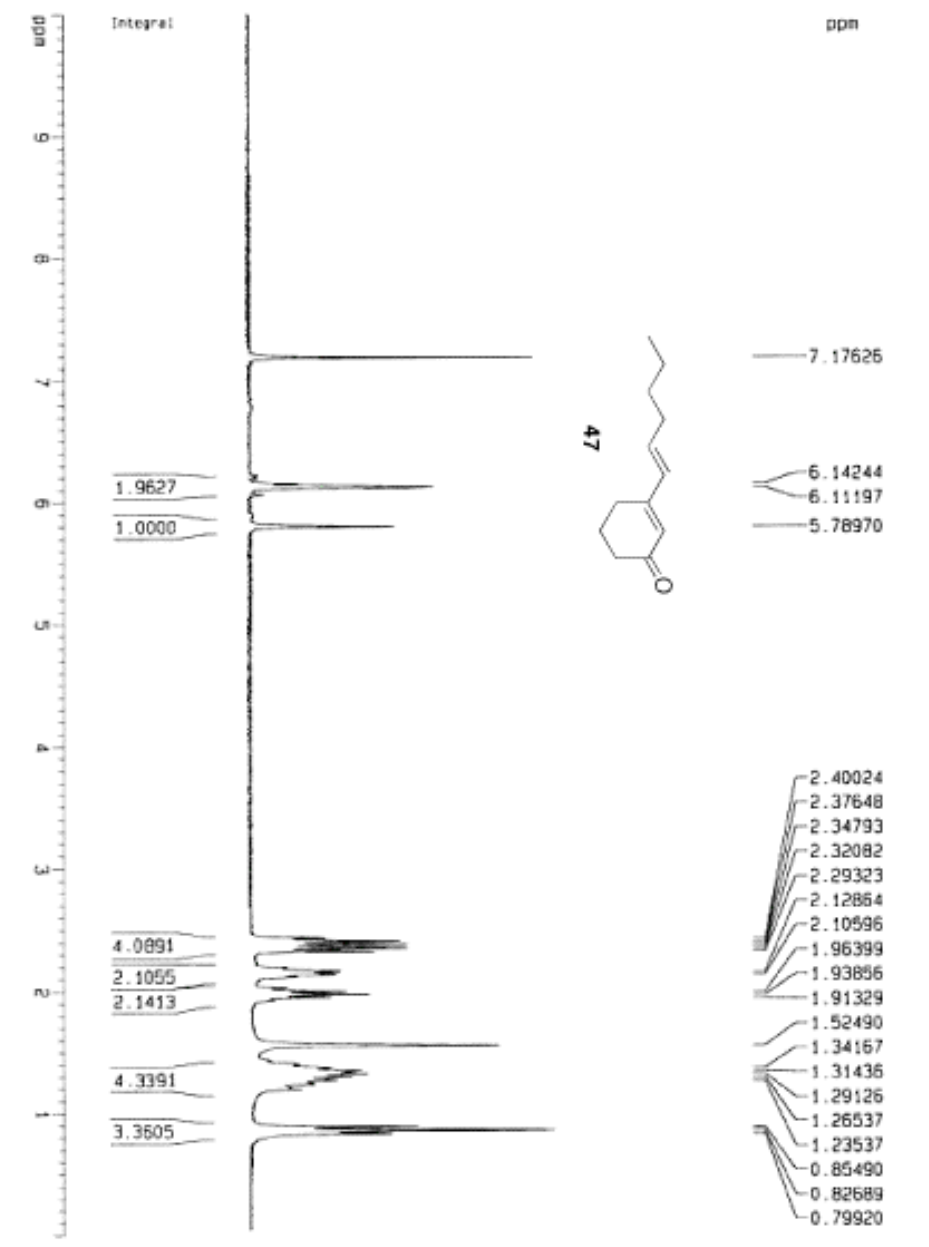

Current Data Parameters  
 NAME proton  
 EXPNO 1  
 PROCNO 1

F2 - Acquisition Parameters  
 Date\_ 20000216  
 Time 13.05  
 INSTRUM spect  
 PROSD 5 mm BBI X Y  
 PULPROG zgpg  
 TO 32768  
 SOLVENT CDCl3  
 NS 8  
 DS 4  
 SWH 6265.664 Hz  
 FIDRES 0.191213 Hz  
 AQ 2.6169384 sec  
 RG 514.7  
 DW 79.800 usec  
 DE 6.00 usec  
 TE 300.0 K  
 O1 1.00000000 sec

\*\*\*\*\* CHANNEL f1 \*\*\*\*\*  
 NUC1 1H  
 P1 6.50 usec  
 PL1 3.00 dB  
 SFO1 200.1303371 MHz

F2 - Processing parameters  
 SI 16384  
 SF 250.1300250 MHz  
 KCM EM  
 SSB 0  
 LB 0.30 Hz  
 GB 0  
 PC 1.00

1D NMR plot parameters  
 CX 20.00 cm  
 FIP 10.000 Dps  
 F1 2501.50 Hz  
 F2 0.000 Dps  
 F3 0.00 Hz  
 SFOCM 0.50000 Dps/cm  
 HZCM 125.06500 Hz/cm

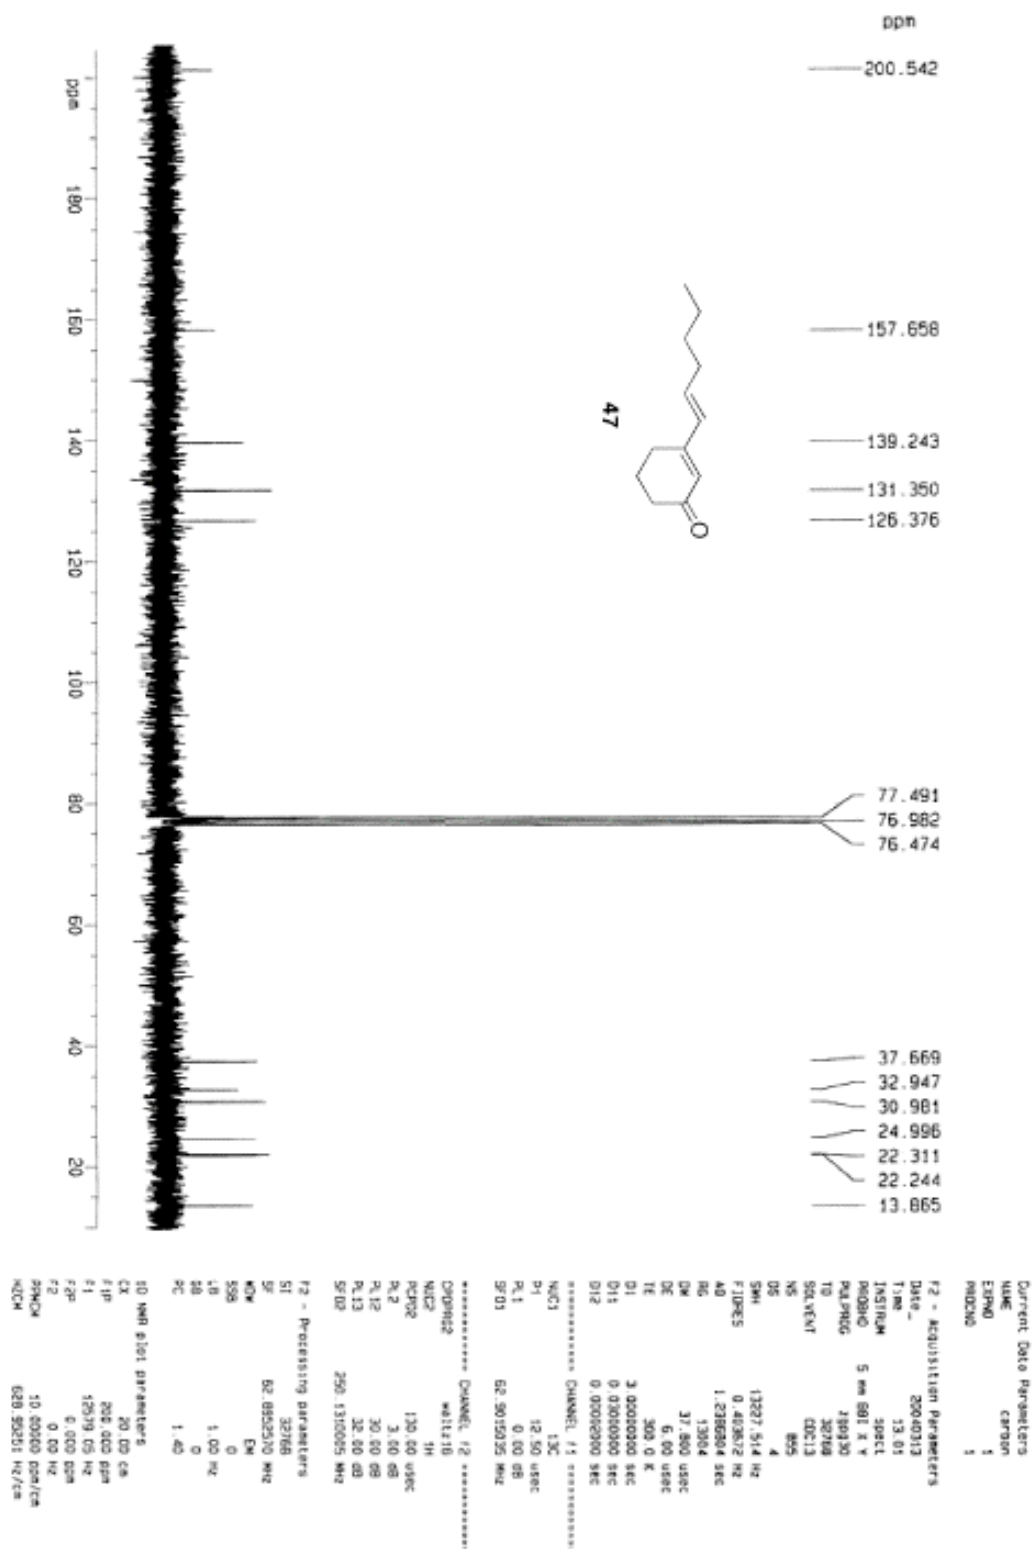

gu\_17Aug2004  
 Archive directory: /nfs/innov480/41/Jung/cyoom/vmr/sys/data  
 Sample directory: gu\_17Aug2004  
 File: PROTON  
 Pulse Sequence: szpul1

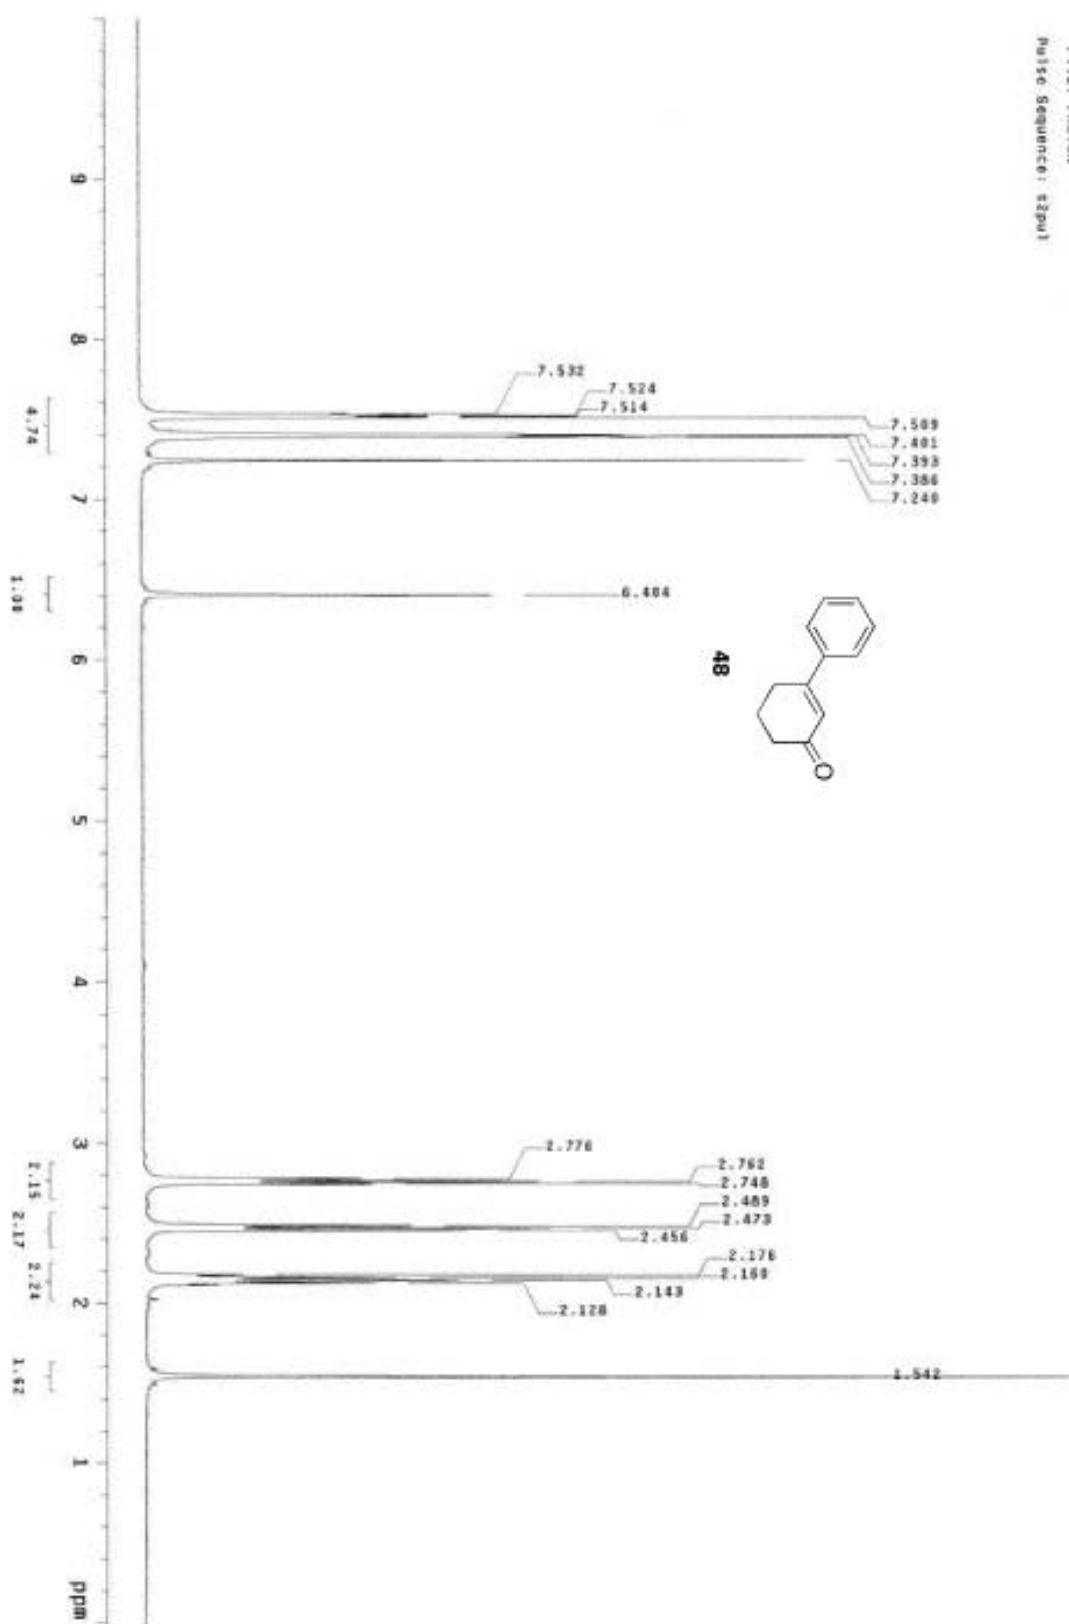

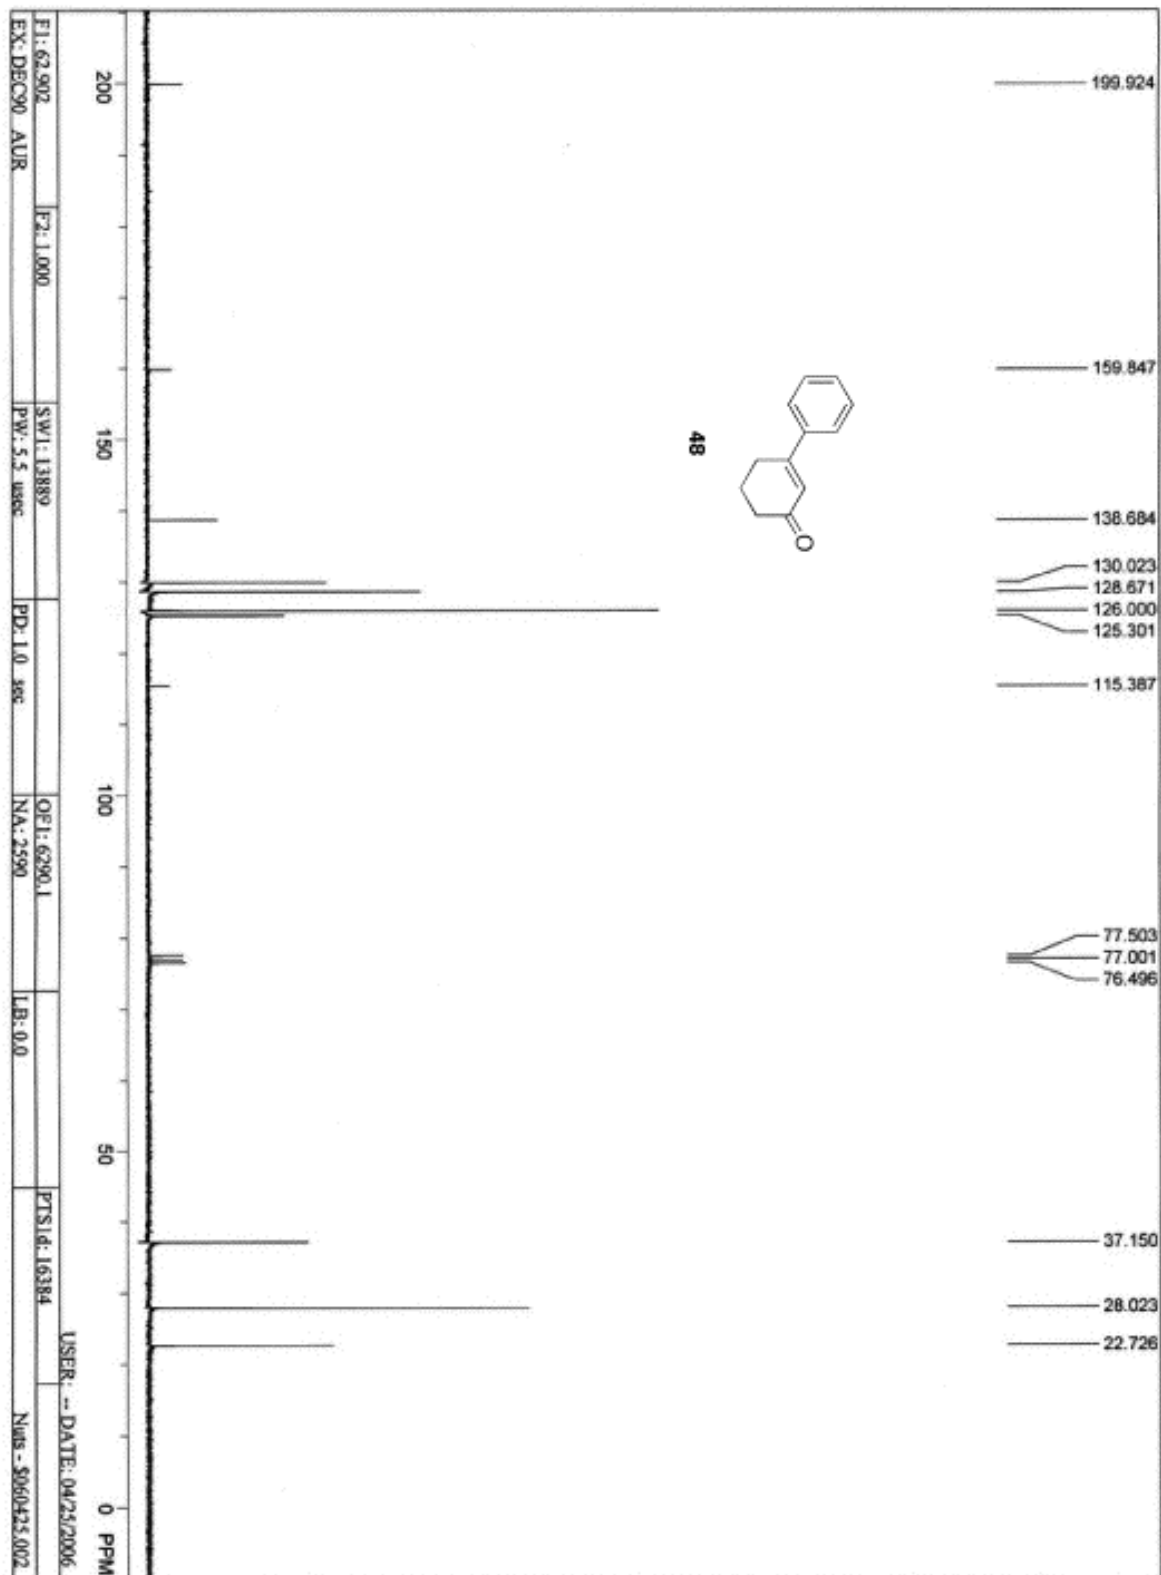

Iphen-butylacryl\_02sep2004  
Archive directory: /nfs/inovado/q1/jung/kyoo/var/sys/data  
Sample directory: Iphen-butylacryl\_02sep2004  
File: p02004  
Pulse Sequence: zgpg1

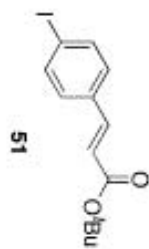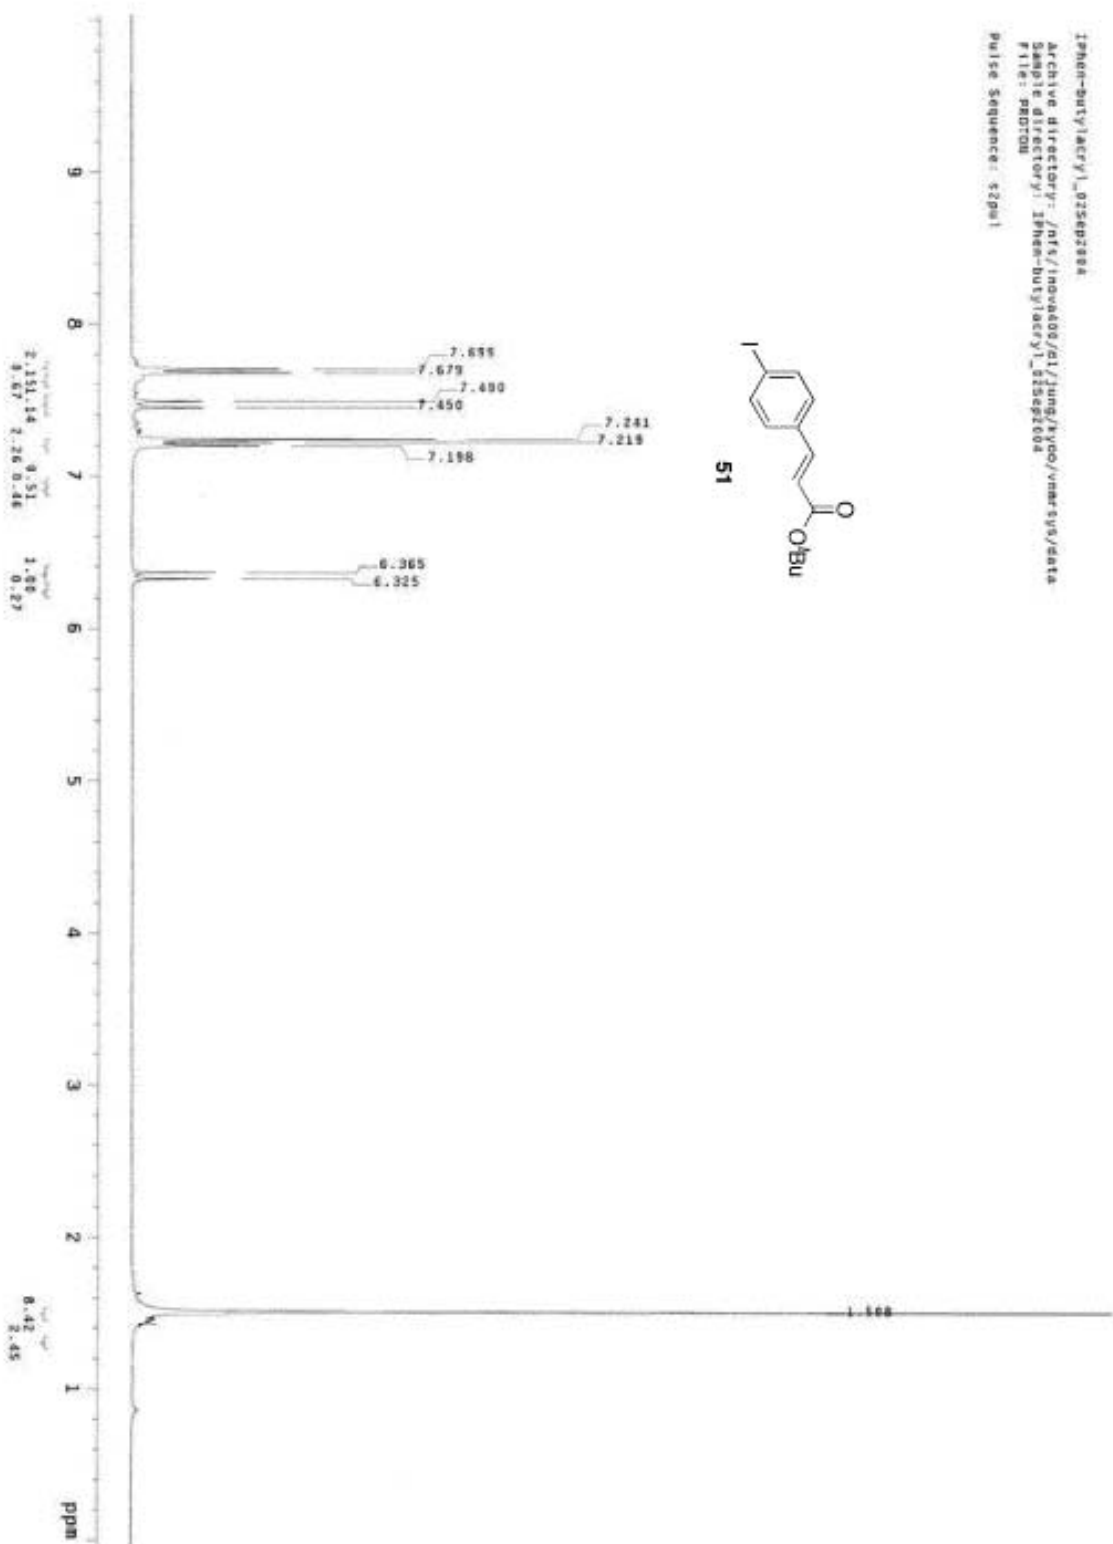



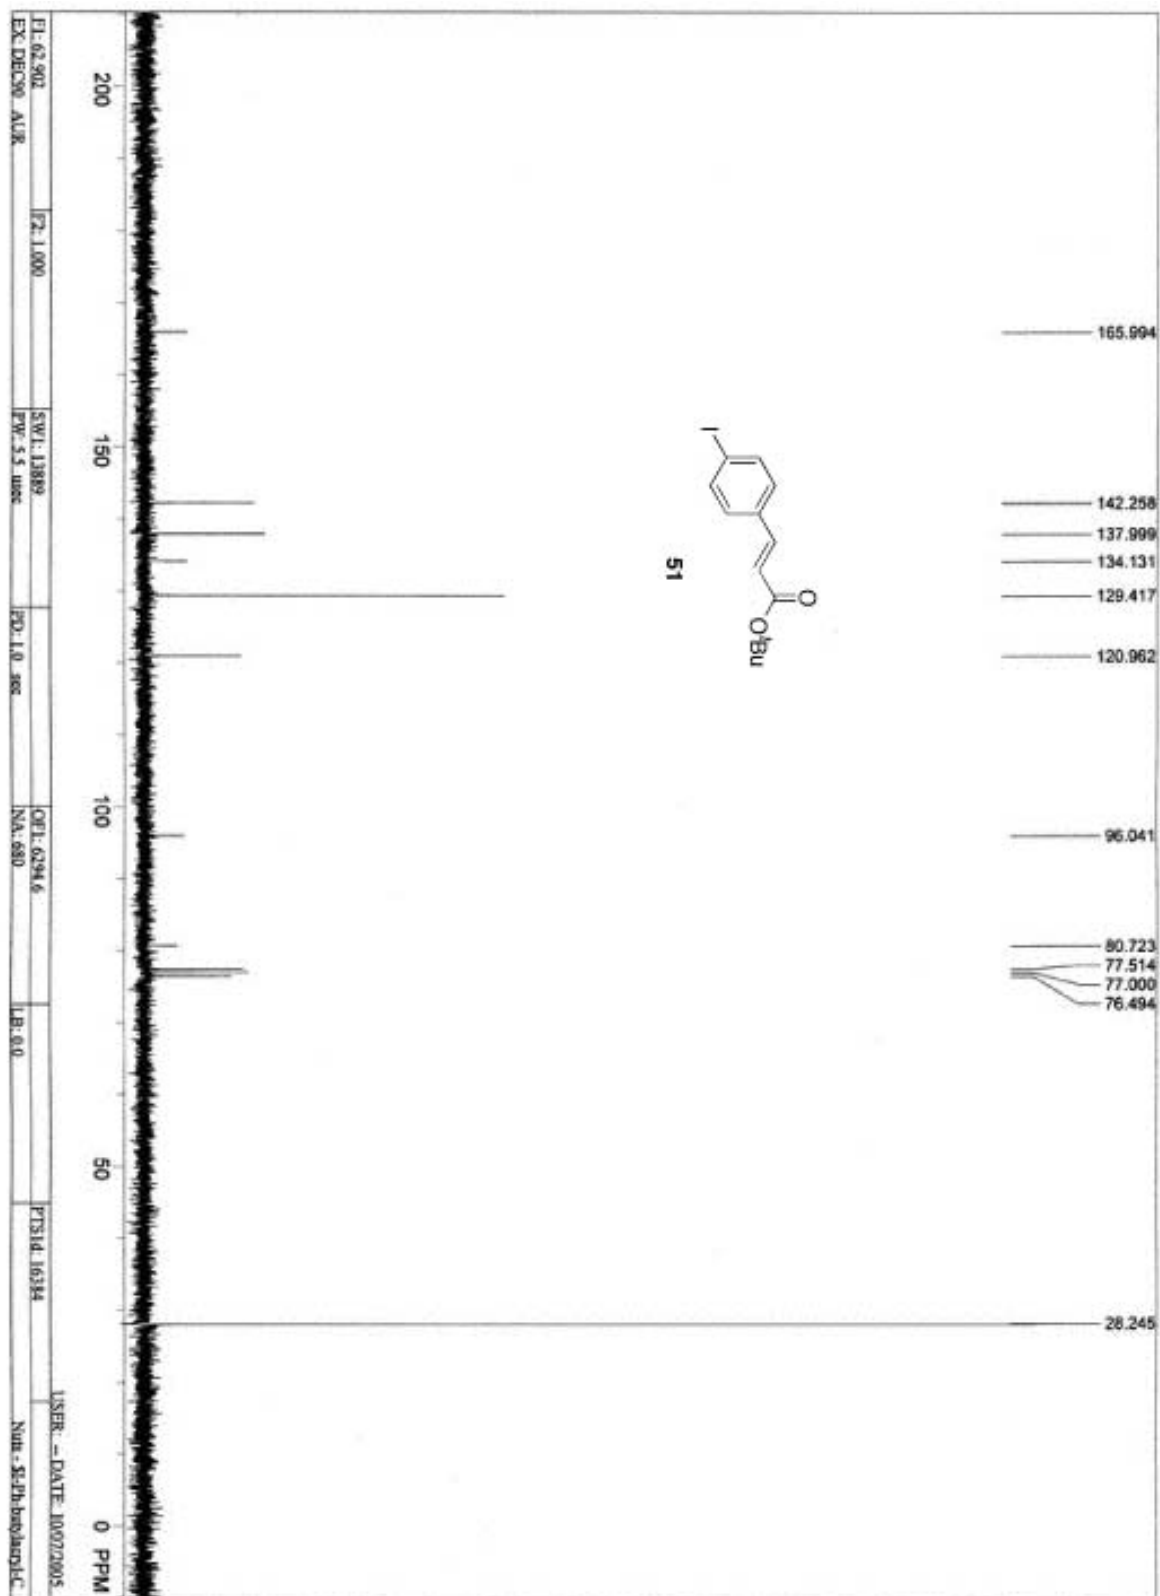

Supplement: NIHMS61669-supplement-si20061017_051.pdf [file NIHMS61669-supplement-si20061017_051.pdf]
